# Supplementary material for: Hypoestins A–D: highly modified fusicoccane diterpenoids with promising Cav3.1 calcium channel inhibitory activity from Hypoestes purpurea
Source: Royal Society of Chemistry journal article supplement (doi:10.1039/d2qo00265e), 2022-01-01
Supplement: d2qo00265e1.pdf [file d2qo00265e1.pdf]

## Supplementary Information

### **Hypoestins A-D: highly modified fusicoccane diterpenoids with promising Ca<sub>v</sub>3.1 calcium channel inhibitory activity from *Hypoestes purpurea***

Xing-De Wu<sup>a,b,†</sup>, Lin-Fen Ding<sup>a,c,†</sup>, Wen-Yan Li<sup>a,†</sup>, Bin Cheng<sup>a</sup>, Tie Lei<sup>a,c</sup>, Hao-Feng Zhou<sup>a</sup>, Qin-Shi Zhao<sup>\*,a</sup>

<sup>a</sup>State Key Laboratory of Phytochemistry and Plant Resources in West China, Kunming Institute of Botany, Chinese Academy of Sciences, Kunming 650201, People's Republic of China

<sup>b</sup> Key Laboratory of Ethnic Medicine Resource Chemistry, State Ethnic Affairs Commission & Ministry of Education, Yunnan Minzu University, Kunming, 650500, People's Republic of China

<sup>c</sup> School of Pharmaceutical Science & Yunnan Key Laboratory of Pharmacology for Natural Products, Kunming Medical University, Kunming 650500, People's Republic of China

† These authors contributed equally to this work.

\*E-mail: qinshizhao@mail.kib.ac.cn

## Contents

|                                                                                                                                                      |         |
|------------------------------------------------------------------------------------------------------------------------------------------------------|---------|
| ECD calculation method of compounds <b>2</b> and <b>4-6</b> .....                                                                                    | S3      |
| Table S1-S4. Computational results of ECD for compound <b>2</b> .....                                                                                | S4-S6   |
| Table S5-S7. Computational results of ECD for compound <b>4</b> .....                                                                                | S7-S8   |
| Table S8-S11. Computational results of ECD for compound <b>5</b> .....                                                                               | S9-S11  |
| Table S12-S14. Computational results of ECD for compound <b>6</b> .....                                                                              | S12-S13 |
| Table S15. Crystallographic data of compound <b>1</b> .....                                                                                          | S14     |
| Table S16. Crystallographic data of compound <b>3</b> .....                                                                                          | S15     |
| Table S17. Crystallographic data of compound <b>6</b> .....                                                                                          | S16     |
| Figure S1. Experimental and calculated ECD spectra for compound <b>4</b> .....                                                                       | S17     |
| Figure S2. Experimental and calculated ECD spectra for compound <b>5</b> .....                                                                       | S17     |
| Figure S3. Experimental and calculated ECD spectra for compound <b>6</b> .....                                                                       | S18     |
| Figure S4. Effects of compounds <b>1, 3, 4,</b> and <b>6</b> on current of human Ca <sub>v</sub> 3.1 low-voltage-gated calcium channel at 25 μM..... | S18     |
| Figure S5. Dose-response curves of inhibition of compound <b>1</b> and mibefradil.....                                                               | S19     |
| Figures S6-S17. <sup>1</sup> H, <sup>13</sup> C, and 2D NMR, HRESIMS, and IR spectra of compound <b>1</b> .....                                      | S19-S25 |
| Figures S18-S29. <sup>1</sup> H, <sup>13</sup> C, and 2D NMR, HRESIMS, and IR spectra of compound <b>2</b> .....                                     | S25-S31 |
| Figures S30-S41. <sup>1</sup> H, <sup>13</sup> C, and 2D NMR, HRESIMS, and IR spectra of compound <b>3</b> .....                                     | S31-S37 |
| Figures S42-S54. <sup>1</sup> H, <sup>13</sup> C, and 2D NMR, HRESIMS, and IR spectra of compound <b>4</b> .....                                     | S37-S43 |
| Figures S55-S66. <sup>1</sup> H, <sup>13</sup> C, and 2D NMR, HRESIMS, and IR spectra of compound <b>5</b> .....                                     | S44-S54 |
| Figures S67-S78. <sup>1</sup> H, <sup>13</sup> C, and 2D NMR, HRESIMS, and IR spectra of compound <b>6</b> .....                                     | S50-S55 |

## ECD calculation method of compounds 2 and 4-6

Theoretical calculations of ECD spectra for compounds **2** and **4-6** were performed with the Gaussian 09 program package<sup>1</sup>. The conformations of **2** and **4-6** were searched by the CHARMM force field and then optimized at the b3lyp/6-311g+(d,p) level of theory with CPCM solvent model in Methanol. All conformers were checked and none of them possess imaginary frequencies. The ECD computation of compounds **2** and **4-6** were performed with time-dependent density functional theory (TDDFT) calculations at the b3lyp/6-311+g(d,p) level with CPCM solvent model in Methanol. For fitting of the calculated curves and experimental CD spectra, the program SpecDis 1.62 was used with  $\sigma$  value of 0.35 eV and UV shift of 15 nm<sup>2</sup>.

## References

1. M. J. Frisch, G. W. Trucks, H. B. Schlegel, G. E. Scuseria, M. A. Robb, J. R. Cheeseman, G. Scalmani, V. Barone, B. Mennucci, G. A. Petersson, H. Nakatsuji, M. Caricato, X. Li, H. P. Hratchian, A. F. Izmaylov, J. Bloino, G. Zheng, J. L. Sonnenberg, M. Hada, M. Ehara, K. Toyota, R. Fukuda, J. Hasegawa, M. Ishida, T. Nakajima, Y. Honda, O. Kitao, H. Nakai, T. Vreven, J. A. Montgomery, J. E. Peralta, F. Ogliaro, M. Bearpark, J. J. Heyd, E. Brothers, K. N. Kudin, V. N. Staroverov, T. Keith, R. Kobayashi, J. Normand, K. Raghavachari, A. Rendell, J. C. Burant, S. S. Iyengar, J. Tomasi, M. Cossi, N. Rega, J. M. Millam, M. Klene, J. E. Knox, J. B. Cross, V. Bakken, C. Adamo, J. Jaramillo, R. Gomperts, R. E. Stratmann, O. Yazyev, A. J. Austin, R. Cammi, C. Pomelli, J. W. Ochterski, R. L. Martin, K. Morokuma, V. G. Zakrzewski, G. A. Voth, P. Salvador, J. J. Dannenberg, S. Dapprich, A. D. Daniels, O. Farkas, J. B. Foresman, J. V. Ortiz, J. Cioslowski, D. J. Fox, Gaussian 09, revision C.01. Gaussian, Inc.: Wallingford CT, 2010.
2. T. Bruhn, A. Schaumlöffel, Y. Hemberger, G. Bringmann, *Chirality* 2013, **25**, 243–249.

**Table S1.** Optimized geometries of predominant conformers of compound **2** at the b3lyp/6-311+g(d,p) level.

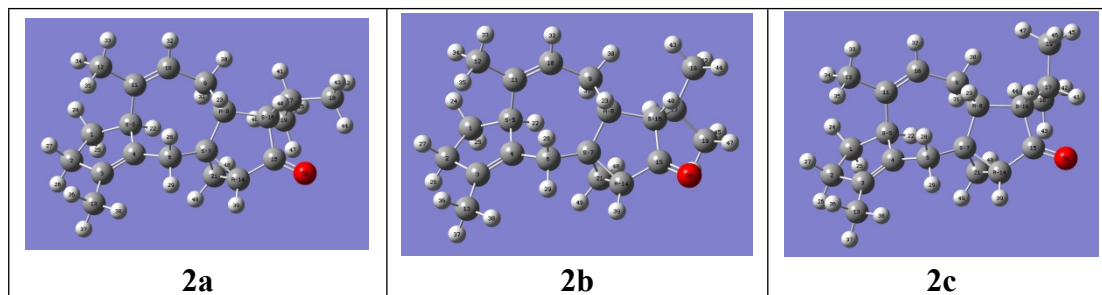

**Table S2.** Boltzmann distribution of conformers **2a-2c**.

| Conformer | E (Hartree) | $\Delta G$ (Kcal/mol) | Proportion (%) |
|-----------|-------------|-----------------------|----------------|
| <b>2a</b> | -853.844869 | 0.591741              | 25.67          |
| <b>2b</b> | -853.845812 | 0                     | 69.69          |
| <b>2c</b> | -853.843254 | 1.605169              | 4.64           |

**Table S3.** Cartesian coordinates of conformers **2a** and **2b**.

| Atomic Type | <b>2a</b> |          |          | <b>2b</b> |          |          |
|-------------|-----------|----------|----------|-----------|----------|----------|
|             | X         | Y        | Z        | X         | Y        | Z        |
| C           | -3.44131  | -0.78922 | 1.456483 | 3.403287  | 0.81743  | 1.500326 |
| C           | -4.34627  | 0.321925 | 0.873199 | 4.304867  | -0.32375 | 0.971397 |
| C           | -3.39564  | 1.192038 | 0.073876 | 3.365153  | -1.19729 | 0.163072 |
| C           | -2.18515  | 0.616183 | -0.05947 | 2.16732   | -0.60773 | -0.01626 |
| C           | -2.11931  | -0.74499 | 0.635898 | 2.097394  | 0.764748 | 0.654459 |
| C           | -1.00562  | 1.138072 | -0.84984 | 1.009062  | -1.11993 | -0.84149 |
| C           | 0.369447  | 0.820896 | -0.253   | -0.38516  | -0.82465 | -0.27902 |
| C           | 1.136057  | -0.43736 | -0.73583 | -1.15828  | 0.43515  | -0.75012 |
| C           | 0.6525    | -1.77254 | -0.11219 | -0.65349  | 1.774081 | -0.15455 |
| C           | -0.65343  | -2.26604 | -0.70191 | 0.65783   | 2.249864 | -0.74541 |
| C           | -1.89519  | -1.85215 | -0.38871 | 1.894713  | 1.850024 | -0.39694 |
| C           | -3.09965  | -2.38914 | -1.12692 | 3.1126    | 2.371802 | -1.12343 |
| C           | -3.87747  | 2.494501 | -0.49679 | 3.846818  | -2.51686 | -0.36694 |
| C           | 1.394874  | 1.942749 | -0.07478 | -1.40657  | -1.97165 | -0.19027 |
| C           | 2.739537  | 1.411877 | -0.38821 | -2.71385  | -1.42594 | -0.60143 |
| C           | 2.675919  | -0.10332 | -0.639   | -2.68573  | 0.108175 | -0.55746 |
| C           | 3.623924  | -0.96699 | 0.251693 | -3.42389  | 0.736307 | 0.681861 |
| C           | 5.095487  | -0.77113 | -0.15786 | -4.16641  | 2.020184 | 0.268908 |
| C           | 3.47063   | -0.77287 | 1.769257 | -4.41078  | -0.21923 | 1.376054 |
| O           | 3.7474    | 2.101459 | -0.52136 | -3.65174  | -2.09225 | -1.03174 |
| C           | 0.683195  | 1.307033 | 1.122035 | -0.76104  | -1.36664 | 1.058083 |
| H           | -1.26672  | -0.75961 | 1.322703 | 1.231717  | 0.793241 | 1.324701 |
| H           | 0.922508  | -0.50975 | -1.80973 | -0.99956  | 0.489268 | -1.83556 |
| H           | -3.9173   | -1.77317 | 1.447231 | 3.893551  | 1.793788 | 1.467173 |
| H           | -3.20988  | -0.56057 | 2.50195  | 3.148657  | 0.628024 | 2.548124 |
| H           | -4.86383  | 0.891334 | 1.656685 | 4.788464  | -0.88262 | 1.783622 |
| H           | -5.13538  | -0.0809  | 0.219955 | 5.120023  | 0.049567 | 0.332922 |
| H           | -1.03022  | 0.730844 | -1.8707  | 1.056543  | -0.69265 | -1.85334 |
| H           | -1.10198  | 2.22345  | -0.95803 | 1.114528  | -2.20207 | -0.96858 |
| H           | 1.409042  | -2.54146 | -0.29725 | -1.40408  | 2.545471 | -0.34992 |
| H           | 0.579935  | -1.66826 | 0.976876 | -0.58015  | 1.685683 | 0.935773 |
| H           | -0.55192  | -3.00375 | -1.4989  | 0.566938  | 2.965753 | -1.56322 |
| H           | -2.80077  | -3.08112 | -1.91972 | 2.827951  | 3.042774 | -1.93917 |
| H           | -3.78587  | -2.92201 | -0.45774 | 3.782787  | 2.923874 | -0.45349 |
| H           | -3.67575  | -1.57469 | -1.58451 | 3.701087  | 1.548551 | -1.5485  |
| H           | -4.69865  | 2.325508 | -1.20689 | 4.693764  | -2.37313 | -1.05184 |
| H           | -4.27947  | 3.142166 | 0.293354 | 4.212871  | -3.15415 | 0.448709 |
| H           | -3.0932   | 3.045719 | -1.02216 | 3.072828  | -3.068   | -0.90731 |
| H           | 1.184271  | 2.982403 | -0.306   | -1.16099  | -2.99354 | -0.4609  |
| H           | 3.077912  | -0.21815 | -1.65385 | -3.23486  | 0.436043 | -1.44688 |
| H           | 3.372788  | -2.01098 | 0.02771  | -2.66693  | 1.012138 | 1.424322 |
| H           | 5.735333  | -1.46718 | 0.395905 | -4.59487  | 2.518075 | 1.145944 |
| H           | 5.24032   | -0.95879 | -1.22781 | -3.51162  | 2.736231 | -0.23607 |
| H           | 5.43482   | 0.247398 | 0.052401 | -4.98824  | 1.780375 | -0.41717 |
| H           | 4.18067   | -1.41762 | 2.298737 | -4.89124  | 0.294808 | 2.215602 |
| H           | 2.470381  | -1.03462 | 2.124552 | -3.91685  | -1.11173 | 1.774257 |
| H           | 3.683546  | 0.260645 | 2.067542 | -5.19605  | -0.55176 | 0.68911  |
| H           | 1.254801  | 0.694846 | 1.809165 | -1.37153  | -0.78373 | 1.739869 |
| H           | -0.04975  | 1.949439 | 1.601799 | -0.04388  | -2.01689 | 1.550711 |

**Table S4.** Cartesian coordinates of conformers **2c**.

| Atomic Type | <b>2c</b> |          |          |
|-------------|-----------|----------|----------|
|             | X         | Y        | Z        |
| C           | 3.393637  | 0.85011  | 1.455505 |
| C           | 4.356671  | -0.15496 | 0.78084  |
| C           | 3.44041   | -1.06307 | -0.01672 |
| C           | 2.186328  | -0.57484 | -0.07944 |
| C           | 2.050915  | 0.749302 | 0.675435 |
| C           | 1.020606  | -1.15325 | -0.8522  |
| C           | -0.36073  | -0.93325 | -0.22594 |
| C           | -1.2162   | 0.285419 | -0.66684 |
| C           | -0.80776  | 1.608389 | 0.037721 |
| C           | 0.444805  | 2.218123 | -0.55821 |
| C           | 1.720438  | 1.879472 | -0.29461 |
| C           | 2.863474  | 2.529006 | -1.04022 |
| C           | 3.992609  | -2.30098 | -0.66255 |
| C           | -1.29862  | -2.12393 | -0.03183 |
| C           | -2.68332  | -1.68659 | -0.29788 |
| C           | -2.72507  | -0.18238 | -0.61045 |
| C           | -3.85969  | 0.540269 | 0.175872 |
| C           | -3.62077  | 0.713887 | 1.684916 |
| C           | -4.30858  | 1.856882 | -0.48322 |
| O           | -3.66346  | -2.42499 | -0.34076 |
| C           | -0.61988  | -1.43557 | 1.155431 |
| H           | 1.222897  | 0.67773  | 1.38781  |
| H           | -0.99629  | 0.432798 | -1.73093 |
| H           | 3.794103  | 1.866747 | 1.489631 |
| H           | 3.216668  | 0.544907 | 2.492095 |
| H           | 4.956207  | -0.71301 | 1.512264 |
| H           | 5.076802  | 0.34081  | 0.112268 |
| H           | 0.998181  | -0.72961 | -1.86643 |
| H           | 1.181136  | -2.22858 | -0.98279 |
| H           | -1.6141   | 2.336384 | -0.067   |
| H           | -0.68787  | 1.433562 | 1.112716 |
| H           | 0.270685  | 2.978375 | -1.32097 |
| H           | 2.495035  | 3.223599 | -1.80085 |
| H           | 3.525594  | 3.088124 | -0.36822 |
| H           | 3.486008  | 1.775755 | -1.53993 |
| H           | 4.762253  | -2.04111 | -1.40239 |
| H           | 4.481641  | -2.9443  | 0.080611 |
| H           | 3.228094  | -2.89193 | -1.1737  |
| H           | -1.01906  | -3.14751 | -0.26129 |
| H           | -3.07633  | -0.17085 | -1.65194 |
| H           | -4.70735  | -0.15077 | 0.074401 |
| H           | -4.52536  | 1.112053 | 2.158082 |
| H           | -3.39568  | -0.24104 | 2.172048 |
| H           | -2.8047   | 1.408894 | 1.901547 |
| H           | -5.2258   | 2.219878 | -0.0058  |
| H           | -4.52123  | 1.711984 | -1.5485  |
| H           | -3.56187  | 2.652064 | -0.39749 |
| H           | -1.22599  | -0.8542  | 1.843165 |
| H           | 0.158307  | -2.02312 | 1.634028 |

**Table S5.** Optimized geometries of predominant conformers of compound **4** at the b3lyp/6-311+g(d,p) level.

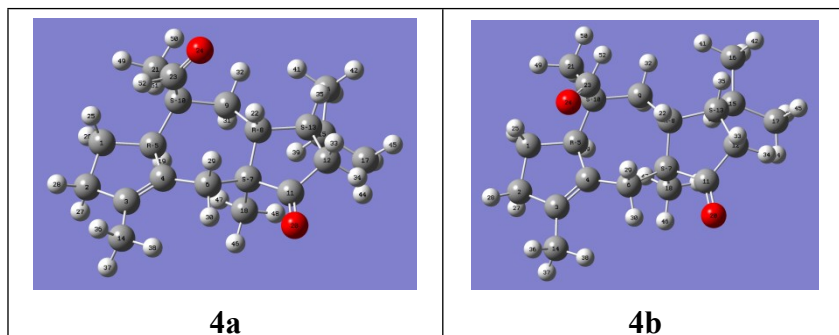

**Table S6.** Boltzmann distribution of conformers **4a** and **4b**.

| Conformer | E (Hartree) | $\Delta G$ (Kcal/mol) | Proportion (%) |
|-----------|-------------|-----------------------|----------------|
| <b>4a</b> | -930.289373 | 0                     | 66.01          |
| <b>4b</b> | -930.288721 | 0.409136              | 33.09          |

**Table S7.** Cartesian coordinates of conformers **4a** and **4b**.

| Atomic Type | <b>4a</b> |          |           | <b>4b</b> |          |          |
|-------------|-----------|----------|-----------|-----------|----------|----------|
|             | X         | Y        | Z         | X         | Y        | Z        |
| C           | 3.433072  | -1.09989 | -0.821873 | 3.398497  | -1.1247  | -0.76089 |
| C           | 4.155898  | 0.246553 | -1.00928  | 4.094318  | 0.217679 | -1.05276 |
| C           | 3.244531  | 1.235717 | -0.31311  | 3.165061  | 1.238866 | -0.42928 |
| C           | 2.022791  | 0.709674 | -0.0855   | 1.959188  | 0.704894 | -0.14651 |
| C           | 1.938305  | -0.72018 | -0.64427  | 1.898256  | -0.75805 | -0.61636 |
| C           | 0.878945  | 1.434444 | 0.588608  | 0.817433  | 1.446526 | 0.509165 |
| C           | -0.53562  | 1.135141 | 0.046842  | -0.6032   | 1.098688 | 0.014086 |
| C           | -1.07047  | -0.24656 | 0.526774  | -1.10264  | -0.27337 | 0.558304 |
| C           | -0.47209  | -1.5121  | -0.09717  | -0.51015  | -1.54593 | -0.05622 |
| C           | 1.048275  | -1.76057 | 0.110017  | 1.019487  | -1.78352 | 0.154225 |
| C           | -1.56972  | 2.085504 | 0.672063  | -1.64007  | 2.05836  | 0.621074 |
| C           | -2.82333  | 1.313042 | 1.048502  | -2.85865  | 1.280117 | 1.088078 |
| C           | -2.63649  | -0.13685 | 0.534027  | -2.66911  | -0.18346 | 0.618458 |
| C           | 3.747225  | 2.616652 | -0.00986  | 3.643199  | 2.647644 | -0.23016 |
| C           | -3.3697   | -0.526   | -0.79727  | -3.43902  | -0.62705 | -0.67504 |
| C           | -3.82003  | -1.99922 | -0.74752  | -3.88433  | -2.0976  | -0.55269 |
| C           | -4.58629  | 0.353357 | -1.13616  | -4.66674  | 0.235943 | -1.01566 |
| C           | -0.61321  | 1.412709 | -1.47887  | -0.71452  | 1.30522  | -1.52079 |
| H           | 1.496853  | -0.66843 | -1.65209  | 1.469436  | -0.75737 | -1.63245 |
| O           | -1.41178  | 3.285843 | 0.838862  | -1.50745  | 3.269781 | 0.710755 |
| C           | 1.354051  | -3.18389 | -0.44767  | 1.310261  | -3.21949 | -0.3735  |
| H           | -0.80684  | -0.28419 | 1.592176  | -0.7992   | -0.27154 | 1.617024 |
| C           | 1.419635  | -1.83601 | 1.582346  | 1.278813  | -1.85901 | 1.649492 |
| O           | 0.660775  | -2.16568 | 2.480525  | 2.150607  | -1.2813  | 2.27487  |
| H           | 3.814819  | -1.58612 | 0.08325   | 3.770576  | -1.52899 | 0.185995 |
| H           | 3.592771  | -1.79082 | -1.65412  | 3.575304  | -1.87243 | -1.53934 |
| H           | 4.254643  | 0.5083   | -2.07468  | 4.190019  | 0.3984   | -2.13567 |
| H           | 5.172255  | 0.2452   | -0.59579  | 5.110561  | 0.268378 | -0.64109 |
| H           | 0.879024  | 1.199347 | 1.664149  | 0.846661  | 1.262482 | 1.593426 |
| H           | 1.044455  | 2.514068 | 0.52247   | 0.961585  | 2.523808 | 0.382757 |
| H           | -0.66279  | -1.54994 | -1.17639  | -0.7057   | -1.59987 | -1.13324 |
| H           | -0.99808  | -2.36774 | 0.337936  | -1.0328   | -2.40068 | 0.388666 |
| H           | -2.86338  | 1.31635  | 2.14658   | -2.84126  | 1.322021 | 2.18621  |
| H           | -3.71923  | 1.837886 | 0.712163  | -3.78121  | 1.77524  | 0.780681 |
| H           | -3.0159   | -0.82152 | 1.301638  | -3.01238  | -0.84674 | 1.420968 |
| H           | 4.581953  | 2.576087 | 0.70281   | 4.479771  | 2.67626  | 0.481339 |
| H           | 4.139622  | 3.091228 | -0.9192   | 4.025148  | 3.062289 | -1.17292 |
| H           | 2.981627  | 3.272844 | 0.410867  | 2.866426  | 3.319309 | 0.143407 |
| H           | -2.66595  | -0.43233 | -1.63206  | -2.75873  | -0.56503 | -1.53193 |
| H           | -4.25804  | -2.30428 | -1.70459  | -4.35097  | -2.44112 | -1.48272 |
| H           | -2.9927   | -2.67951 | -0.52845  | -3.04981  | -2.76872 | -0.33228 |
| H           | -4.58198  | -2.14078 | 0.029659  | -4.62143  | -2.20821 | 0.252843 |
| H           | -5.0812   | -0.02883 | -2.03579  | -5.18305  | -0.18271 | -1.8865  |
| H           | -4.31289  | 1.394787 | -1.33392  | -4.40223  | 1.269451 | -1.26119 |
| H           | -5.32449  | 0.345542 | -0.32454  | -5.38403  | 0.257794 | -0.18582 |
| H           | -0.15791  | 2.385227 | -1.69055  | -0.29666  | 2.282751 | -1.78019 |
| H           | -0.08152  | 0.655163 | -2.05744  | -0.16073  | 0.542835 | -2.07184 |
| H           | -1.64258  | 1.445545 | -1.84468  | -1.74906  | 1.284807 | -1.87255 |
| H           | 2.382606  | -3.49909 | -0.25288  | 2.350762  | -3.51322 | -0.21593 |
| H           | 0.682033  | -3.92036 | 0.002296  | 0.670131  | -3.95685 | 0.121787 |
| H           | 1.198211  | -3.18952 | -1.53192  | 1.101126  | -3.26146 | -1.44778 |
| H           | 2.477889  | -1.61454 | 1.824148  | 0.589954  | -2.54927 | 2.185203 |



**Table S8.** Optimized geometries of predominant conformers of compound **5** at the b3lyp/6-311+g(d,p) level.

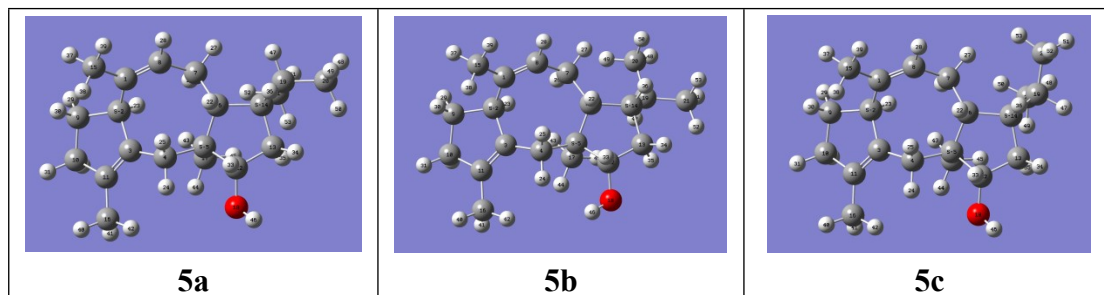

**Table S9.** Boltzmann distribution of conformers **5a-5c**.

| Conformer | E (Hartree) | $\Delta G$ (Kcal/mol) | Proportion (%) |
|-----------|-------------|-----------------------|----------------|
| <b>5a</b> | -856.231495 | 0                     | 76.94          |
| <b>5b</b> | -856.230274 | 0.766189              | 21.11          |
| <b>5c</b> | -856.228022 | 2.179340              | 1.94           |

**Table S10.** Cartesian coordinates of conformers **5a** and **5b**.

| Atomic Type | <b>5a</b> |          |          | <b>5b</b> |          |          |
|-------------|-----------|----------|----------|-----------|----------|----------|
|             | X         | Y        | Z        | X         | Y        | Z        |
| C           | -1.8217   | -2.07915 | -0.5055  | -1.85058  | -2.00881 | -0.64798 |
| C           | -2.25977  | -0.97393 | 0.445249 | -2.24717  | -1.00096 | 0.41976  |
| C           | -2.10647  | 0.457486 | -0.10278 | -2.09932  | 0.464007 | -0.02448 |
| C           | -0.92697  | 0.888177 | -0.9396  | -0.95     | 0.928142 | -0.8828  |
| C           | 0.496939  | 0.773028 | -0.30091 | 0.497313  | 0.811927 | -0.29962 |
| C           | 1.194997  | -0.60325 | -0.57908 | 1.221977  | -0.538   | -0.61528 |
| C           | 0.645463  | -1.85395 | 0.15431  | 0.635853  | -1.85016 | -0.03975 |
| C           | -0.53191  | -2.45293 | -0.58488 | -0.56124  | -2.34926 | -0.82053 |
| C           | -3.73193  | -1.00225 | 0.926375 | -3.7002   | -1.05525 | 0.952731 |
| C           | -4.07266  | 0.471261 | 1.222252 | -4.01681  | 0.396374 | 1.365779 |
| C           | -3.11017  | 1.243366 | 0.340262 | -3.07702  | 1.224556 | 0.509682 |
| C           | 1.48374   | 1.69236  | -1.06747 | 1.440956  | 1.753142 | -1.10577 |
| C           | 2.883856  | 1.199949 | -0.6743  | 2.863064  | 1.263307 | -0.81309 |
| C           | 2.756485  | -0.3442  | -0.55912 | 2.766407  | -0.25482 | -0.45674 |
| C           | -2.85113  | -2.69892 | -1.42339 | -2.91569  | -2.5386  | -1.57979 |
| C           | -3.31948  | 2.71623  | 0.136917 | -3.27893  | 2.709398 | 0.418935 |
| C           | 0.442827  | 1.195789 | 1.18069  | 0.499061  | 1.194434 | 1.192139 |
| O           | 1.246646  | 3.076095 | -0.77325 | 1.355324  | 3.148457 | -0.78651 |
| C           | 3.639122  | -1.00209 | 0.536179 | 3.552757  | -0.56247 | 0.855411 |
| C           | 5.128984  | -0.77459 | 0.216372 | 3.479641  | -2.01466 | 1.361924 |
| C           | 3.35111   | -0.60016 | 1.991736 | 5.040389  | -0.20748 | 0.644081 |
| H           | 0.981842  | -0.78939 | -1.64055 | 1.109002  | -0.64518 | -1.70531 |
| H           | -1.61564  | -1.04762 | 1.33423  | -1.56759  | -1.14967 | 1.272291 |
| H           | -1.0694   | 1.938716 | -1.21132 | -1.12402  | 1.98454  | -1.11982 |
| H           | -0.91766  | 0.322411 | -1.88189 | -0.96806  | 0.395261 | -1.84334 |
| H           | 0.39069   | -1.61695 | 1.192824 | 0.401399  | -1.73693 | 1.024955 |
| H           | 1.433704  | -2.61252 | 0.201567 | 1.406887  | -2.62202 | -0.10521 |
| H           | -0.27005  | -3.21092 | -1.32491 | -0.32062  | -3.01964 | -1.64724 |
| H           | -3.87777  | -1.66377 | 1.786687 | -3.81983  | -1.77441 | 1.769652 |
| H           | -4.3835   | -1.35965 | 0.123495 | -4.3843   | -1.35161 | 0.151964 |
| H           | -5.12363  | 0.714749 | 1.019479 | -5.0713   | 0.661413 | 1.215158 |
| H           | -3.89522  | 0.726411 | 2.279588 | -3.8038   | 0.572435 | 2.432493 |
| H           | 1.32455   | 1.532269 | -2.14508 | 1.207105  | 1.624745 | -2.17305 |
| H           | 3.643164  | 1.507311 | -1.40102 | 3.536371  | 1.46376  | -1.6519  |
| H           | 3.156734  | 1.654456 | 0.284446 | 3.24212   | 1.83779  | 0.039409 |
| H           | 3.134727  | -0.77977 | -1.49295 | 3.267595  | -0.84752 | -1.23486 |
| H           | -3.61863  | -3.25349 | -0.86965 | -3.65618  | -3.15202 | -1.05182 |
| H           | -3.37867  | -1.93214 | -2.00628 | -3.47079  | -1.72014 | -2.05705 |
| H           | -2.37844  | -3.39114 | -2.12634 | -2.47302  | -3.15272 | -2.36966 |
| H           | -4.29912  | 2.910172 | -0.3201  | -4.27221  | 2.942841 | 0.012816 |
| H           | -3.31883  | 3.242664 | 1.101468 | -3.23795  | 3.166254 | 1.417387 |
| H           | -2.55556  | 3.17584  | -0.4948  | -2.53361  | 3.207477 | -0.206   |
| H           | -0.1071   | 0.47487  | 1.789973 | 0.010889  | 0.42902  | 1.801531 |
| H           | -0.06652  | 2.159157 | 1.272109 | -0.04392  | 2.131957 | 1.344578 |
| H           | 1.435834  | 1.306306 | 1.61759  | 1.50844   | 1.33722  | 1.583147 |
| H           | 1.778816  | 3.610045 | -1.37812 | 0.529658  | 3.503755 | -1.14287 |
| H           | 3.46596   | -2.08458 | 0.463263 | 3.170281  | 0.085173 | 1.655201 |
| H           | 5.765306  | -1.33301 | 0.912266 | 4.208371  | -2.1609  | 2.167829 |
| H           | 5.374568  | -1.10177 | -0.80062 | 2.498886  | -2.27602 | 1.761802 |
| H           | 5.398358  | 0.285178 | 0.301387 | 3.72623   | -2.72818 | 0.565385 |
| H           | 4.007093  | -1.16146 | 2.667345 | 5.606471  | -0.35966 | 1.569703 |
| H           | 2.319151  | -0.80919 | 2.284917 | 5.190003  | 0.830364 | 0.333066 |
| H           | 3.543968  | 0.464489 | 2.167102 | 5.482028  | -0.85395 | -0.12586 |

**Table S11.** Cartesian coordinates of conformer **5c**.

| Atomic Type | 5c       |          |          |
|-------------|----------|----------|----------|
|             | X        | Y        | Z        |
| C           | -1.59036 | -2.12945 | -0.53312 |
| C           | -2.13946 | -1.08265 | 0.426074 |
| C           | -2.09716 | 0.366216 | -0.09581 |
| C           | -0.95411 | 0.904666 | -0.92061 |
| C           | 0.473844 | 0.911675 | -0.27895 |
| C           | 1.299122 | -0.39345 | -0.56817 |
| C           | 0.839271 | -1.68491 | 0.159639 |
| C           | -0.27019 | -2.37833 | -0.60238 |
| C           | -3.61218 | -1.24108 | 0.877661 |
| C           | -4.07243 | 0.192886 | 1.203924 |
| C           | -3.16575 | 1.059266 | 0.350543 |
| C           | 1.367498 | 1.931583 | -1.03085 |
| C           | 2.802648 | 1.567102 | -0.6385  |
| C           | 2.834325 | 0.016193 | -0.5621  |
| C           | -2.54941 | -2.83104 | -1.46772 |
| C           | -3.49295 | 2.513816 | 0.172788 |
| C           | 0.375892 | 1.302332 | 1.209041 |
| O           | 0.99798  | 3.282522 | -0.72012 |
| C           | 3.861733 | -0.49956 | 0.491827 |
| C           | 3.459247 | -0.36799 | 1.969888 |
| C           | 4.378355 | -1.92131 | 0.194488 |
| H           | 1.101758 | -0.59275 | -1.6299  |
| H           | -1.50839 | -1.11722 | 1.326657 |
| H           | -1.18675 | 1.941295 | -1.18359 |
| H           | -0.89272 | 0.351811 | -1.86854 |
| H           | 0.543435 | -1.46622 | 1.190883 |
| H           | 1.680073 | -2.37769 | 0.226743 |
| H           | 0.069798 | -3.09847 | -1.34851 |
| H           | -3.72085 | -1.93483 | 1.71791  |
| H           | -4.21876 | -1.62607 | 0.052403 |
| H           | -5.13731 | 0.357114 | 0.994382 |
| H           | -3.92629 | 0.435225 | 2.269059 |
| H           | 1.227055 | 1.769626 | -2.11087 |
| H           | 3.539757 | 1.960842 | -1.34734 |
| H           | 3.026149 | 2.015003 | 0.336542 |
| H           | 3.233317 | -0.34804 | -1.51693 |
| H           | -3.2694  | -3.45664 | -0.92589 |
| H           | -3.13808 | -2.10976 | -2.05007 |
| H           | -2.00999 | -3.47245 | -2.17096 |
| H           | -4.47908 | 2.636435 | -0.29485 |
| H           | -3.54812 | 3.01836  | 1.14739  |
| H           | -2.76078 | 3.047376 | -0.43799 |
| H           | -0.11464 | 0.526265 | 1.800563 |
| H           | -0.21349 | 2.217231 | 1.315463 |
| H           | 1.353559 | 1.486639 | 1.655575 |
| H           | 1.477282 | 3.872772 | -1.31682 |
| H           | 4.731371 | 0.161051 | 0.350522 |
| H           | 4.2898   | -0.68546 | 2.611116 |
| H           | 3.21944  | 0.6642   | 2.241357 |
| H           | 2.594704 | -0.99163 | 2.217276 |
| H           | 5.255053 | -2.14285 | 0.814406 |
| H           | 4.67783  | -2.02236 | -0.85509 |
| H           | 3.632727 | -2.69478 | 0.404081 |

**Table S12.** Optimized geometries of predominant conformer of compound **6** at the b3lyp/6-311+g(d,p) level.

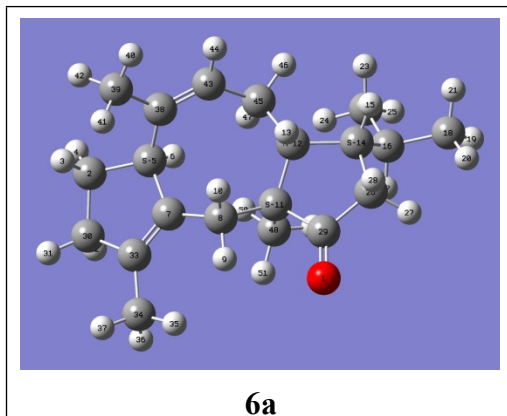

**Table S13.** Boltzmann distribution of conformer **6a**.

| Conformer | E (Hartree) | $\Delta G$ (Kcal/mol) | Proportion (%) |
|-----------|-------------|-----------------------|----------------|
| <b>6a</b> | -855.055214 | 0                     | 100            |

**Table S14.** Cartesian coordinates of conformer **6a**.

| Atomic Type | <b>6a</b> |          |          |
|-------------|-----------|----------|----------|
|             | X         | Y        | Z        |
| O           | 1.293623  | 2.954068 | -1.11514 |
| C           | -3.70957  | -0.98824 | 0.879934 |
| H           | -4.36452  | -1.28057 | 0.053877 |
| H           | -3.86835  | -1.70227 | 1.694545 |
| C           | -2.23615  | -0.95209 | 0.403216 |
| H           | -1.59425  | -1.09342 | 1.285928 |
| C           | -2.0629   | 0.508713 | -0.05142 |
| C           | -0.88348  | 0.96949  | -0.87066 |
| H           | -1.0032   | 2.034959 | -1.08608 |
| H           | -0.881    | 0.451459 | -1.83898 |
| C           | 0.533799  | 0.791075 | -0.23467 |
| C           | 1.231469  | -0.56706 | -0.56249 |
| H           | 1.057565  | -0.69368 | -1.64247 |
| C           | 2.779213  | -0.30436 | -0.51818 |
| H           | 3.243131  | -1.06863 | -1.15529 |
| C           | 3.598765  | -0.29193 | 0.807292 |
| H           | 3.387371  | 0.644135 | 1.341374 |
| C           | 5.103743  | -0.28443 | 0.469407 |
| H           | 5.703055  | -0.17114 | 1.379412 |
| H           | 5.377561  | 0.528793 | -0.21018 |
| H           | 5.39472   | -1.22906 | -0.00755 |
| C           | 3.315017  | -1.44928 | 1.777767 |
| H           | 3.463958  | -2.42212 | 1.294253 |
| H           | 2.299234  | -1.42128 | 2.177927 |
| H           | 4.004964  | -1.39673 | 2.627649 |
| C           | 2.837546  | 1.078131 | -1.21532 |
| H           | 3.683313  | 1.712178 | -0.93523 |
| H           | 2.873523  | 0.970486 | -2.30824 |
| C           | 1.524319  | 1.775313 | -0.89022 |
| C           | -4.02667  | 0.468327 | 1.272585 |
| H           | -5.07294  | 0.741898 | 1.085455 |
| H           | -3.84633  | 0.650285 | 2.344198 |
| C           | -3.05129  | 1.281968 | 0.443601 |
| C           | -3.23646  | 2.767471 | 0.33273  |
| H           | -2.46337  | 3.253833 | -0.267   |
| H           | -3.23105  | 3.231703 | 1.328489 |
| H           | -4.21141  | 3.004687 | -0.11343 |
| C           | -1.81024  | -1.99481 | -0.62097 |
| C           | -2.84573  | -2.53224 | -1.58211 |
| H           | -2.38226  | -3.1774  | -2.33421 |
| H           | -3.36306  | -1.71774 | -2.10617 |
| H           | -3.62028  | -3.11555 | -1.06934 |
| C           | -0.52513  | -2.37941 | -0.72252 |
| H           | -0.26808  | -3.08626 | -1.51276 |
| C           | 0.653069  | -1.85599 | 0.072097 |
| H           | 1.432935  | -2.62401 | 0.071951 |
| H           | 0.384932  | -1.69146 | 1.120408 |
| C           | 0.493332  | 1.164883 | 1.269364 |
| H           | 1.48722   | 1.202038 | 1.719346 |
| H           | -0.10319  | 0.448032 | 1.837489 |
| H           | 0.034962  | 2.151102 | 1.389179 |

**Table S15.** Crystallographic data of compound **1**.

---

|                                   |                                                                                                                               |
|-----------------------------------|-------------------------------------------------------------------------------------------------------------------------------|
| Empirical formula                 | C20H28O                                                                                                                       |
| Formula weight                    | 284.42                                                                                                                        |
| Temperature                       | 100(2) K                                                                                                                      |
| Wavelength                        | 1.54178 Å                                                                                                                     |
| Crystal system                    | Monoclinic                                                                                                                    |
| Space group                       | P1211                                                                                                                         |
| Unit cell dimensions              | a = 10.0477(2) Å $\alpha = 90^\circ$<br>b = 7.16210(10) Å $\beta = 91.8680(10)^\circ$<br>c = 11.3732(2) Å $\gamma = 90^\circ$ |
| Volume                            | 818.01(2) Å <sup>3</sup>                                                                                                      |
| Z                                 | 2                                                                                                                             |
| Calculated density                | 1.155 Mg/m <sup>3</sup>                                                                                                       |
| Absorption coefficient            | 0.518 mm <sup>-1</sup>                                                                                                        |
| F(000)                            | 312                                                                                                                           |
| Crystal size                      | 0.560 x 0.290 x 0.200 mm <sup>3</sup>                                                                                         |
| Theta range for data collection   | 3.89 to 72.33°                                                                                                                |
| Indices ranges                    | -12 ≤ h ≤ 12, -8 ≤ k ≤ 8, -12 ≤ l ≤ 14                                                                                        |
| Reflections collected             | 12142                                                                                                                         |
| Independent reflections           | 3212 [R(int) = 0.0353]                                                                                                        |
| Completeness to theta = 67.679°   | 99.1 %                                                                                                                        |
| Absorption correction             | Semi-empirical from equivalents                                                                                               |
| Refinement method                 | Full-matrix least-squares on F <sup>2</sup>                                                                                   |
| Data/restraints/parameters        | 3212/1/194                                                                                                                    |
| Goodness-of-fit on F <sup>2</sup> | 1.052                                                                                                                         |
| Final R indices [I > 2σ(I)]       | R <sub>1</sub> = 0.0327, wR <sub>2</sub> = 0.0841                                                                             |
| R indices (all data)              | R <sub>1</sub> = 0.0328, wR <sub>2</sub> = 0.0842                                                                             |
| Absolute structure parameter      | -0.03(8)                                                                                                                      |
| Largest diff. peak and hole       | 0.211 and -0.208 e.Å <sup>-3</sup>                                                                                            |

---

**Table S16.** Crystallographic data of compound **3**.

---

|                                   |                                                                                                                          |
|-----------------------------------|--------------------------------------------------------------------------------------------------------------------------|
| Empirical formula                 | C20H30O4                                                                                                                 |
| Formula weight                    | 334.44                                                                                                                   |
| Temperature                       | 100(2) K                                                                                                                 |
| Wavelength                        | 1.54178 Å                                                                                                                |
| Crystal system                    | Orthorhombic                                                                                                             |
| Space group                       | P2 <sub>1</sub> 2 <sub>1</sub> 2 <sub>1</sub>                                                                            |
| Unit cell dimensions              | $a = 6.5674(2)$ Å $\alpha = 90^\circ$<br>$b = 15.9608(6)$ Å $\beta = 90^\circ$<br>$c = 16.7628(6)$ Å $\gamma = 90^\circ$ |
| Volume                            | 1757.09(11) Å <sup>3</sup>                                                                                               |
| Z                                 | 4                                                                                                                        |
| Calculated density                | 1.264 Mg/m <sup>3</sup>                                                                                                  |
| Absorption coefficient            | 0.691 mm <sup>-1</sup>                                                                                                   |
| F(000)                            | 728                                                                                                                      |
| Crystal size                      | 0.770 x 0.620 x 0.220 mm <sup>3</sup>                                                                                    |
| Theta range for data collection   | 5.28 to 72.12°                                                                                                           |
| Indices ranges                    | -8 ≤ h ≤ 8, -15 ≤ k ≤ 19, -20 ≤ l ≤ 20                                                                                   |
| Reflections collected             | 19975                                                                                                                    |
| Independent reflections           | 3453 [R(int) = 0.0333]                                                                                                   |
| Completeness to theta = 67.679°   | 99.5 %                                                                                                                   |
| Absorption correction             | Semi-empirical from equivalents                                                                                          |
| Refinement method                 | Full-matrix least-squares on F <sup>2</sup>                                                                              |
| Data/restraints/parameters        | 3453 / 0 / 224                                                                                                           |
| Goodness-of-fit on F <sup>2</sup> | 1.098                                                                                                                    |
| Final R indices [I > 2σ(I)]       | R <sub>1</sub> = 0.0287, wR <sub>2</sub> = 0.0731                                                                        |
| R indices (all data)              | R <sub>1</sub> = 0.0287, wR <sub>2</sub> = 0.0732                                                                        |
| Absolute structure parameter      | 0.09(3)                                                                                                                  |
| Largest diff. peak and hole       | 0.455 and -0.164 e.Å <sup>-3</sup>                                                                                       |

---

**Table S17.** Crystallographic data of compound **6**.

---

|                                   |                                                                                                                                                                              |
|-----------------------------------|------------------------------------------------------------------------------------------------------------------------------------------------------------------------------|
| Empirical formula                 | C20H30O                                                                                                                                                                      |
| Formula weight                    | 286.44                                                                                                                                                                       |
| Temperature                       | 100(2) K                                                                                                                                                                     |
| Wavelength                        | 1.54178 Å                                                                                                                                                                    |
| Crystal system                    | Monoclinic                                                                                                                                                                   |
| Space group                       | P1211                                                                                                                                                                        |
| Unit cell dimensions              | $a = 10.8483(7) \text{ \AA}$ $\alpha = 79.290(2)^\circ$<br>$b = 6.9259(4) \text{ \AA}$ $\beta = 101.620(2)^\circ$<br>$c = 11.4177(7) \text{ \AA}$ $\gamma = 75.423(2)^\circ$ |
| Volume                            | 840.28(9) Å <sup>3</sup>                                                                                                                                                     |
| Z                                 | 2                                                                                                                                                                            |
| Calculated density                | 1.132 Mg/m <sup>3</sup>                                                                                                                                                      |
| Absorption coefficient            | 0.505 mm <sup>-1</sup>                                                                                                                                                       |
| F(000)                            | 316                                                                                                                                                                          |
| Crystal size                      | 0.660 x 0.170 x 0.050 mm <sup>3</sup>                                                                                                                                        |
| Theta range for data collection   | 3.95 to 72.23°                                                                                                                                                               |
| Indices ranges                    | -12 ≤ h ≤ 13, -8 ≤ k ≤ 8, -14 ≤ l ≤ 13                                                                                                                                       |
| Reflections collected             | 11725                                                                                                                                                                        |
| Independent reflections           | 3271 [R(int) = 0.0722]                                                                                                                                                       |
| Completeness to theta = 67.679°   | 99.7 %                                                                                                                                                                       |
| Absorption correction             | Semi-empirical from equivalents                                                                                                                                              |
| Refinement method                 | Full-matrix least-squares on F <sup>2</sup>                                                                                                                                  |
| Data/restraints/parameters        | 3271 / 1 / 195                                                                                                                                                               |
| Goodness-of-fit on F <sup>2</sup> | 1.078                                                                                                                                                                        |
| Final R indices [I > 2σ(I)]       | R <sub>1</sub> = 0.0472, wR <sub>2</sub> = 0.1200                                                                                                                            |
| R indices (all data)              | R <sub>1</sub> = 0.0497, wR <sub>2</sub> = 0.1232                                                                                                                            |
| Absolute structure parameter      | -0.35(19)                                                                                                                                                                    |
| Largest diff. peak and hole       | 0.216 and -0.298 e.Å <sup>-3</sup>                                                                                                                                           |

---



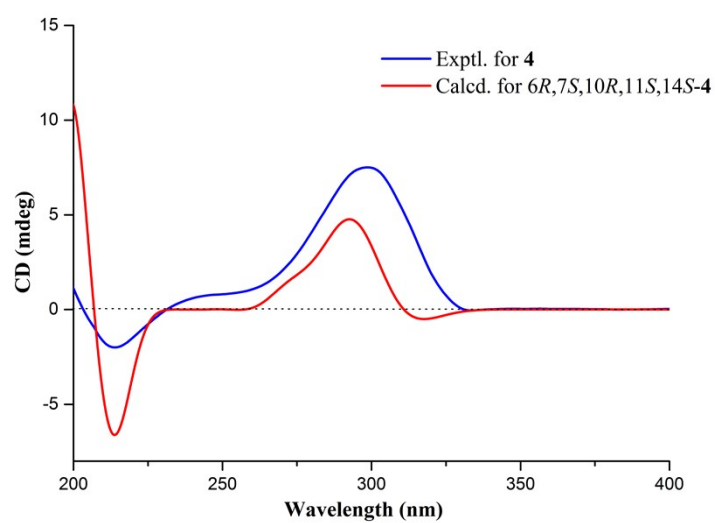

**Figure S1.** Experimental and calculated ECD spectra for compound **4**.

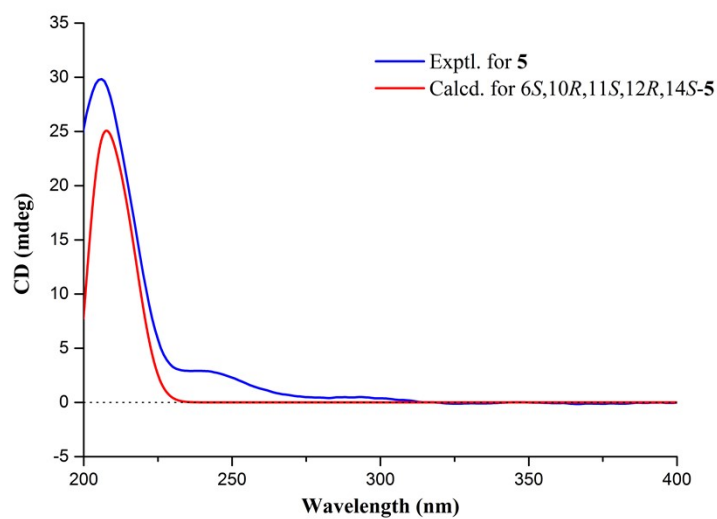

**Figure S2.** Experimental and calculated ECD spectra for compound **5**.

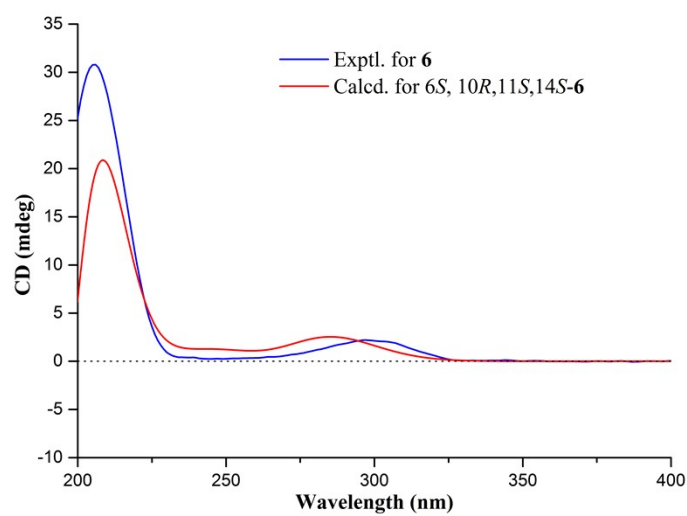

**Figure S3.** Experimental and calculated ECD spectra for compound **6**.

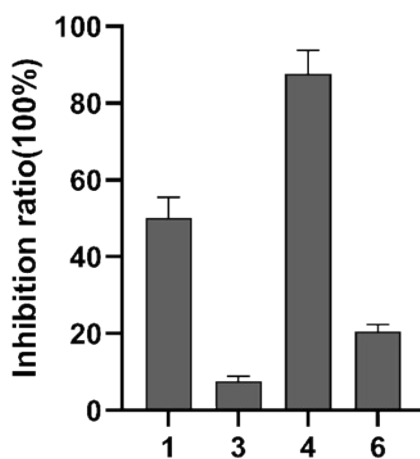

**Figure S4.** Effects of compounds **1**, **3**, **4**, and **6** on current of human  $Ca_v3.1$  low-voltage-gated calcium channel at  $25 \mu\text{M}$ . All the data were represented as mean  $\pm$  SD ( $n = 3$ ).

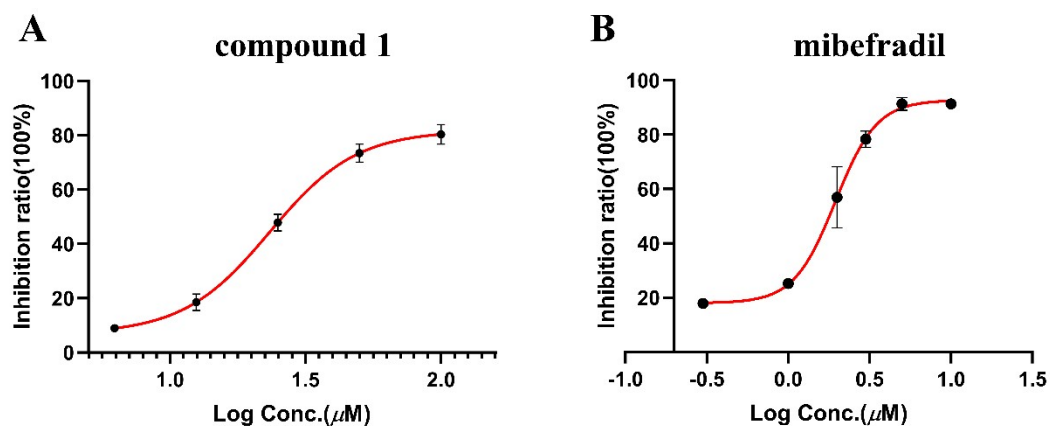

**Figure S5.** Dose-response curves of inhibition of compound **1** (A) and the positive control, mibefradil (B), on peak current of  $Ca_v3.1$ . Data were fit using a Hill equation and the points represent mean  $\pm$  SD ( $n = 4$ ).

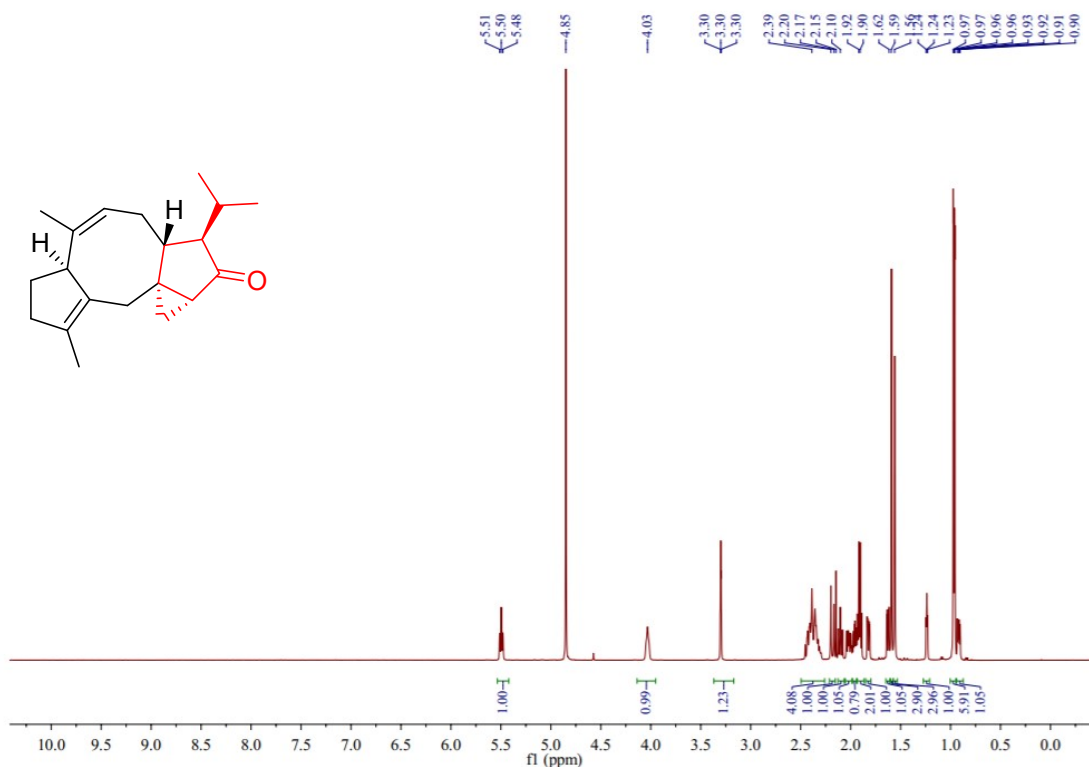

**Figure S6.**  $^1\text{H}$  NMR (500 MHz) spectrum of hypoestin A (**1**) in methanol- $d_4$ .

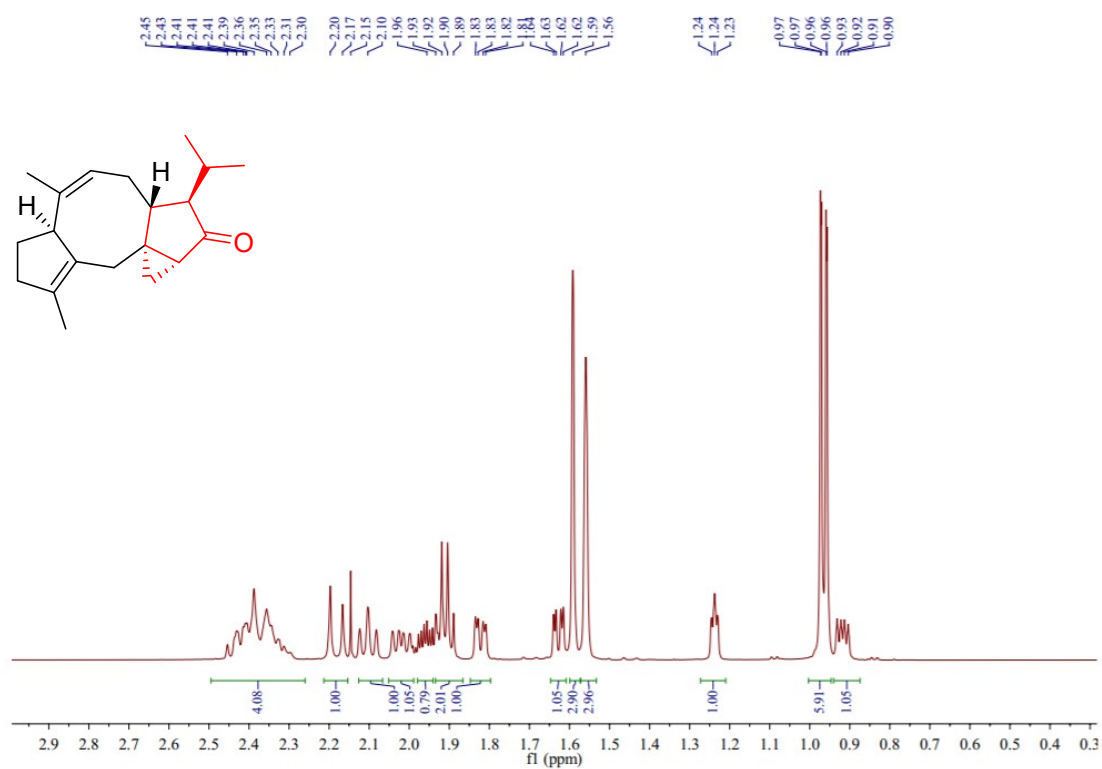

**Figure S7.** Expanded  $^1\text{H}$  NMR spectrum of hypoestin A (**1**).

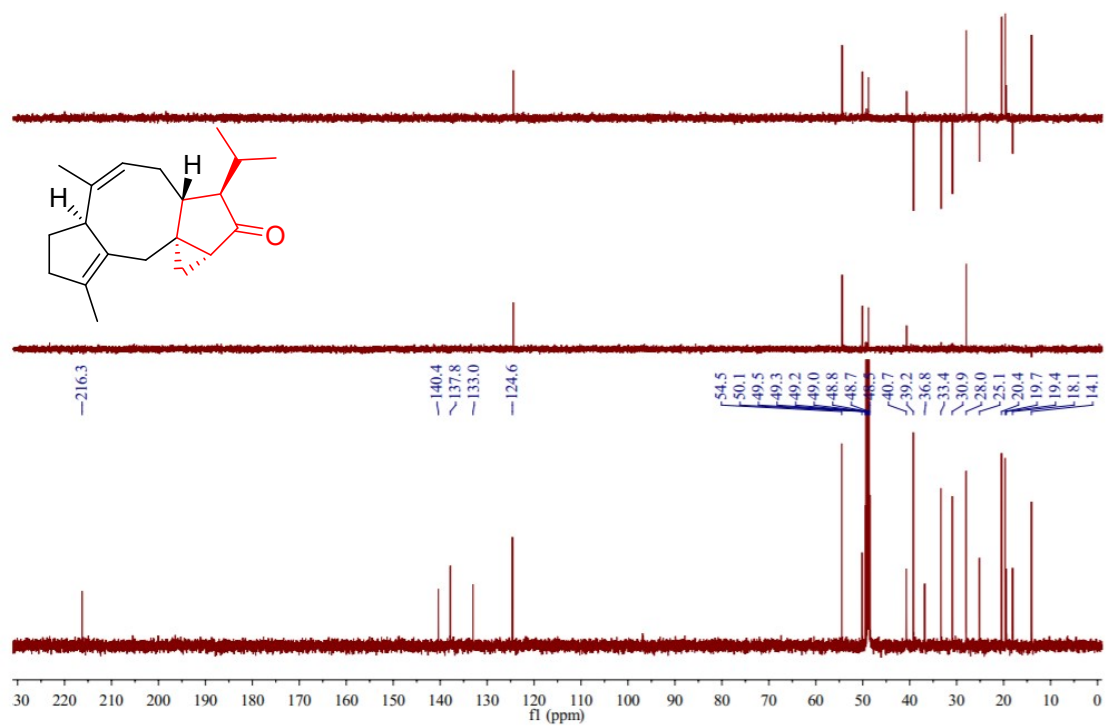

**Figure S8.**  $^{13}\text{C}$  NMR and DEPT (125 MHz) spectra of hypoestin A (**1**) in methanol- $d_4$ .

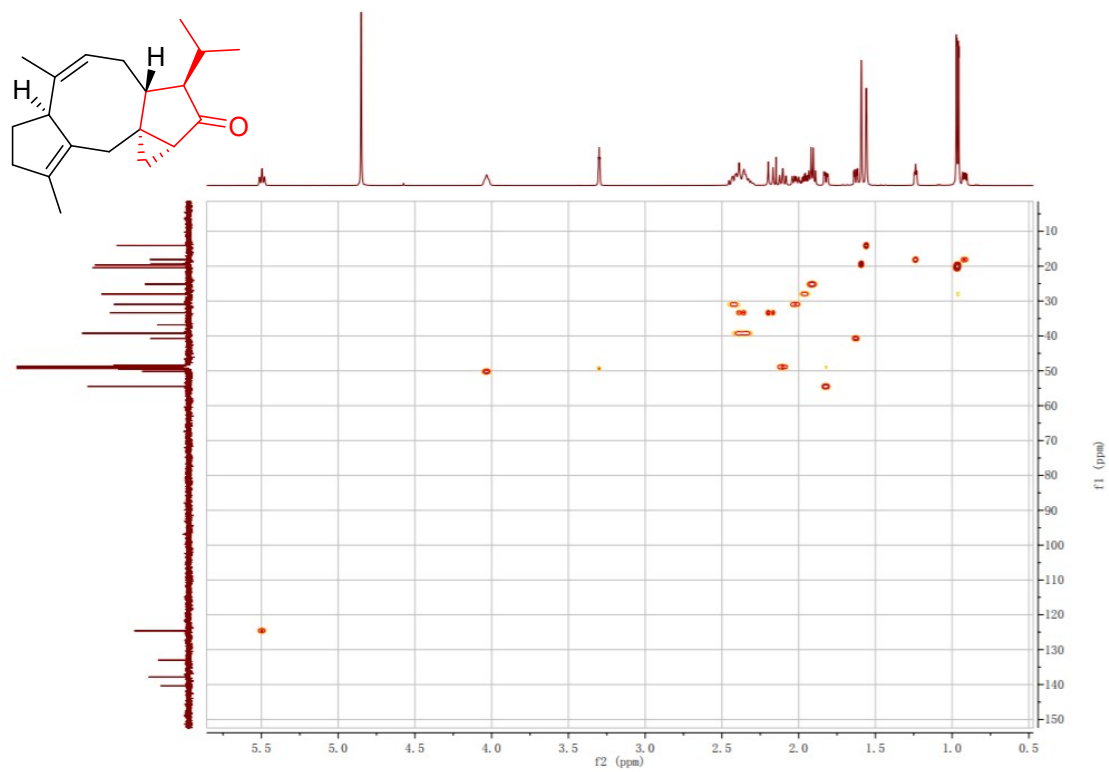

**Figure S9.** HSQC spectrum of hypoestin A (**1**).

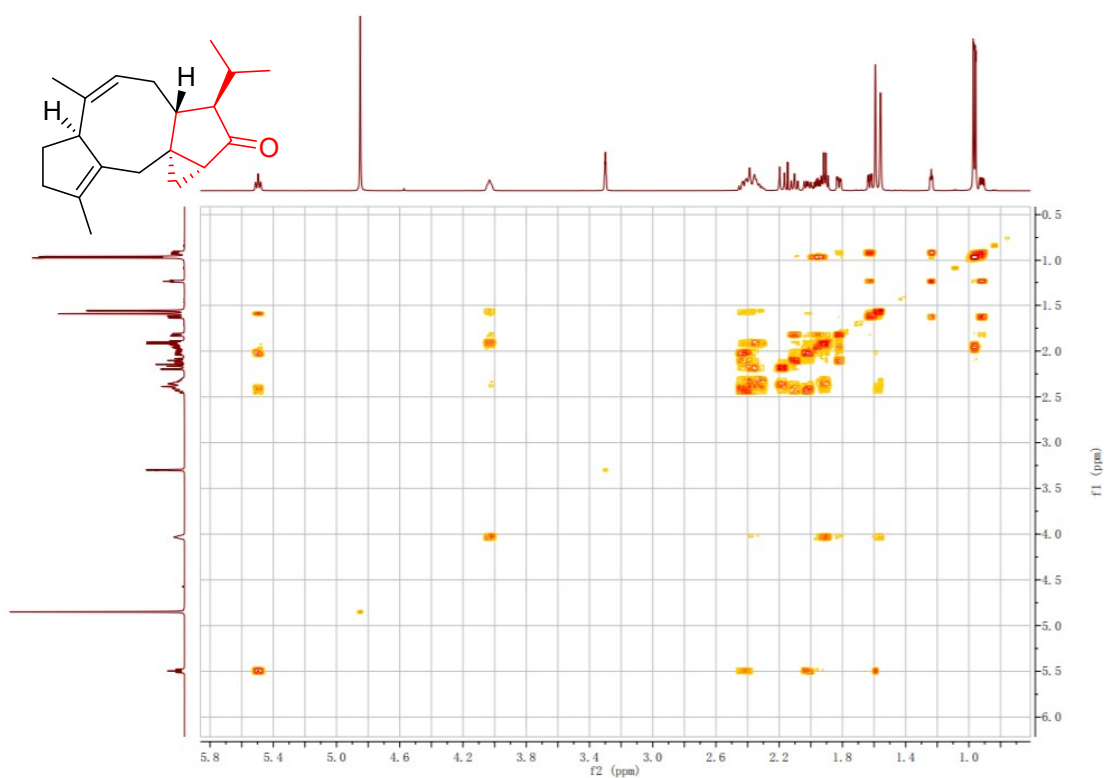

**Figure S10.**  $^1\text{H}$ - $^1\text{H}$  COSY spectrum of hypoestin A (**1**).

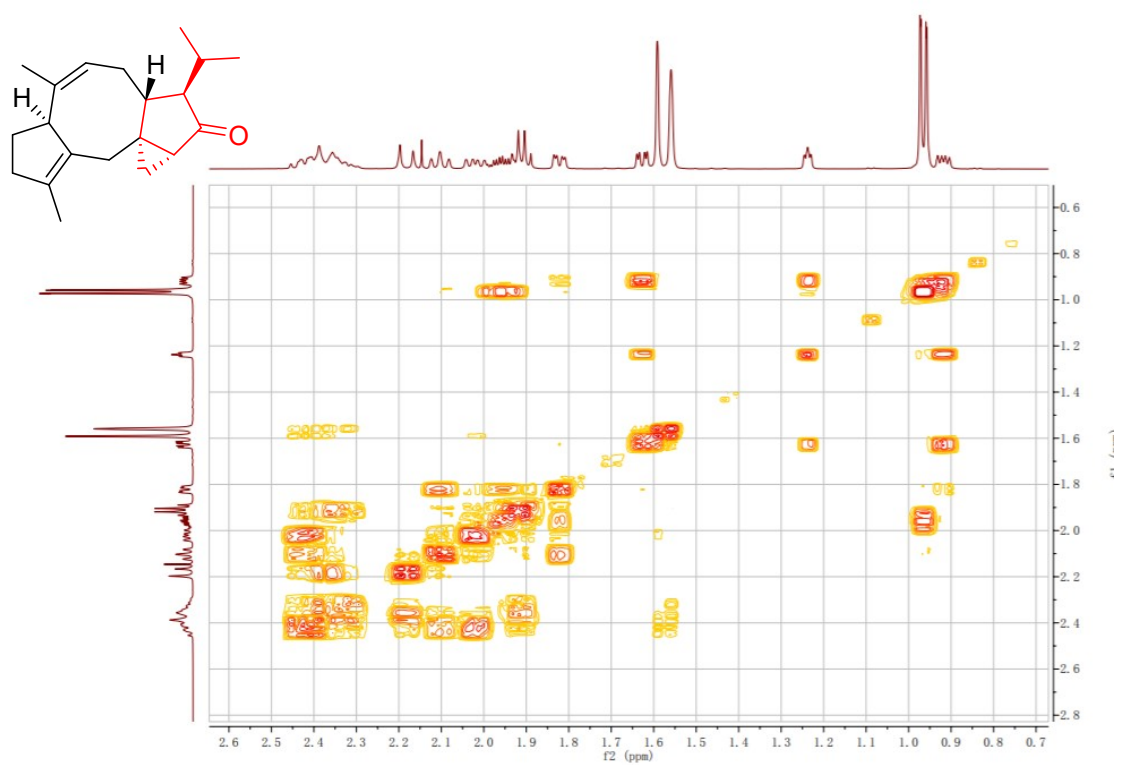

**Figure S11.** Expanded  $^1\text{H}$ - $^1\text{H}$  COSY spectrum of hypoestin A (**1**).

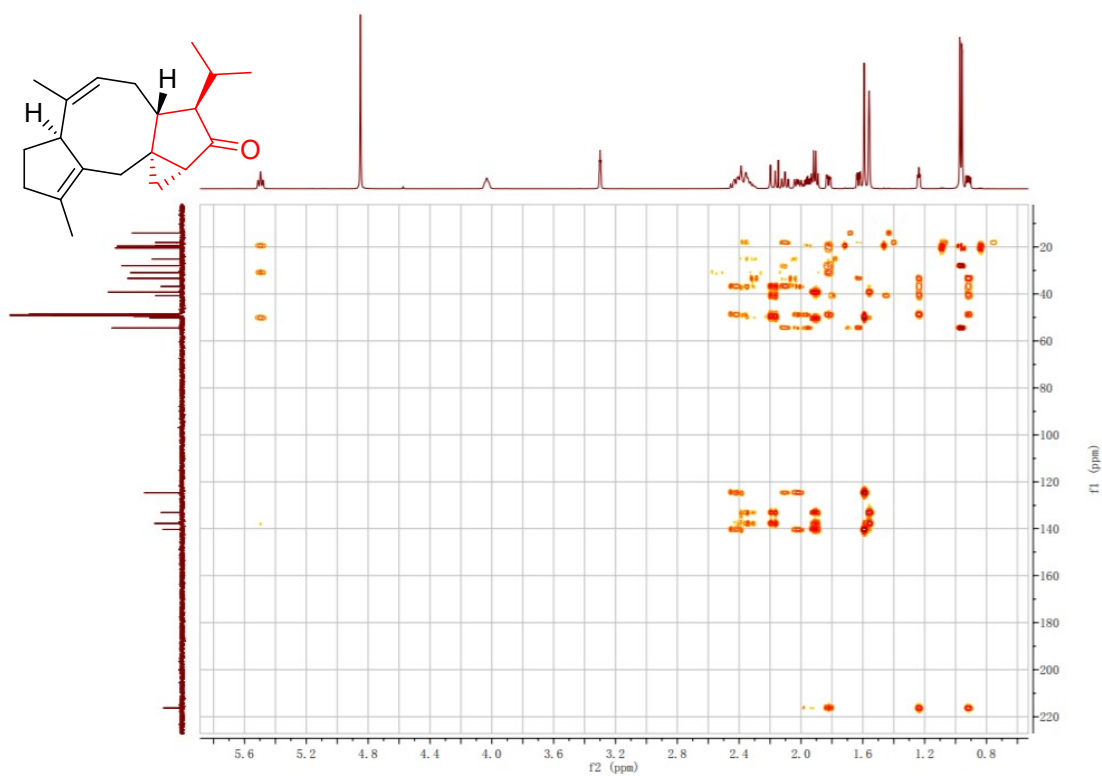

**Figure S12.** HMBC spectrum of hypoestin A (**1**).

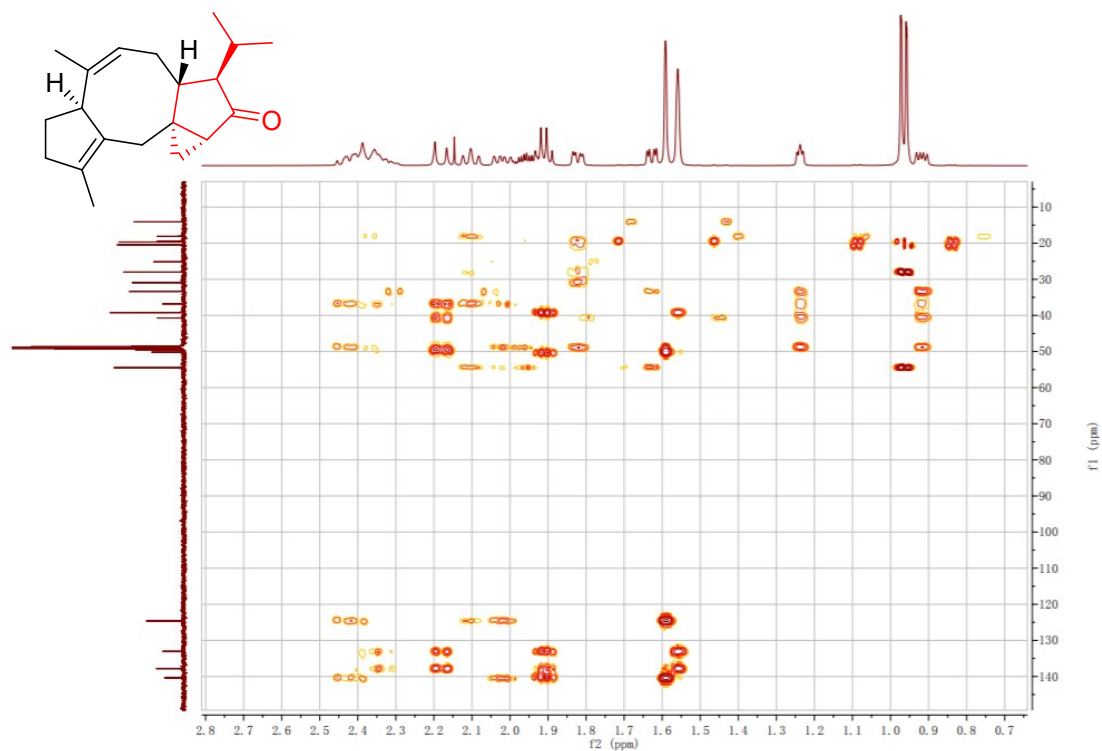

**Figure S13.** Expanded HMBC spectrum of hypoestin A (**1**).

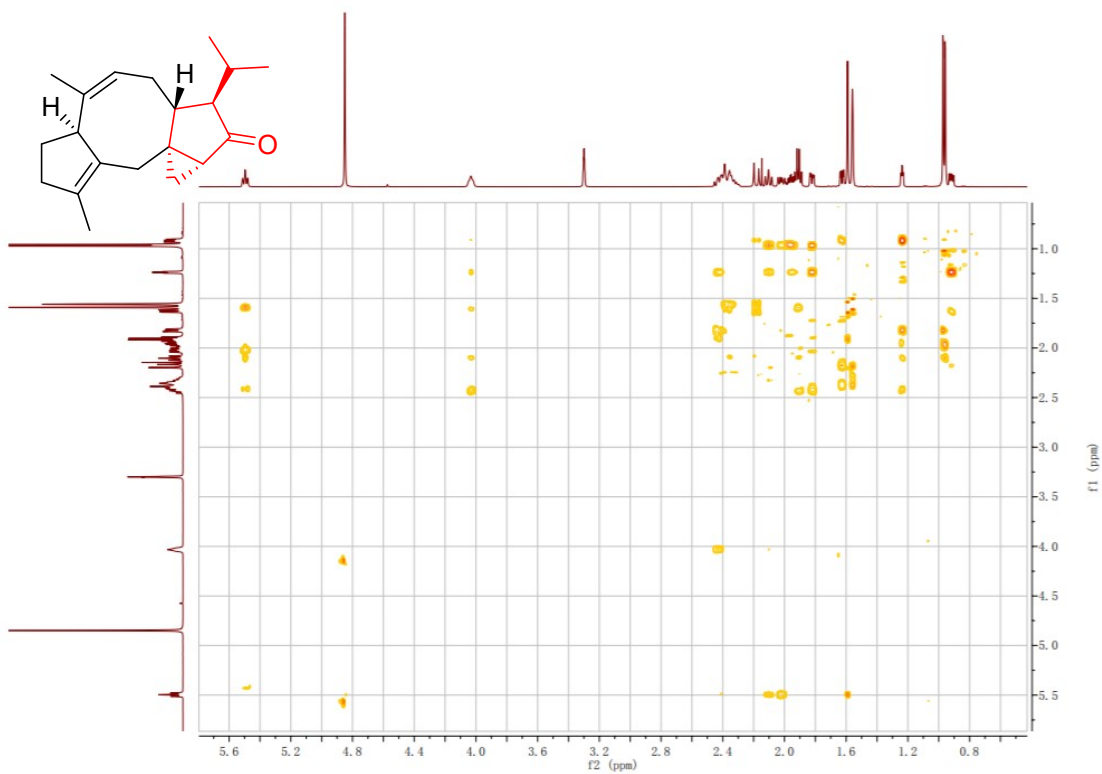

**Figure S14.** ROESY spectrum of hypoestin A (**1**).

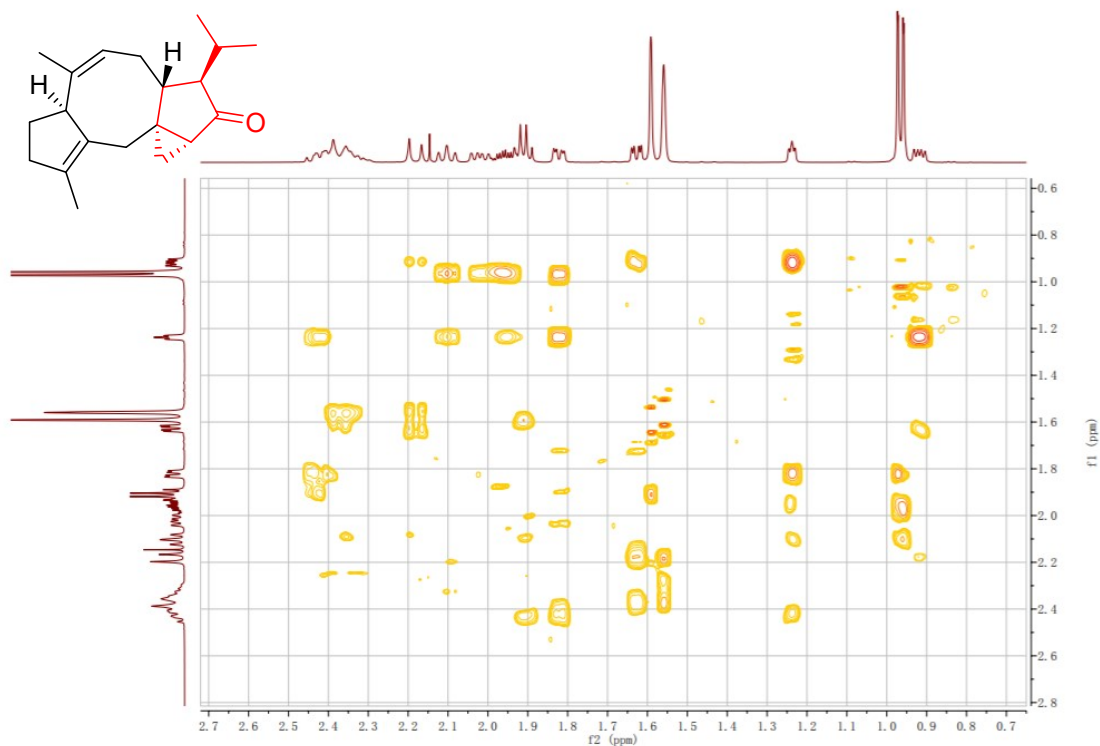

Figure S15. Expanded ROESY spectrum of hypoestin A (1).

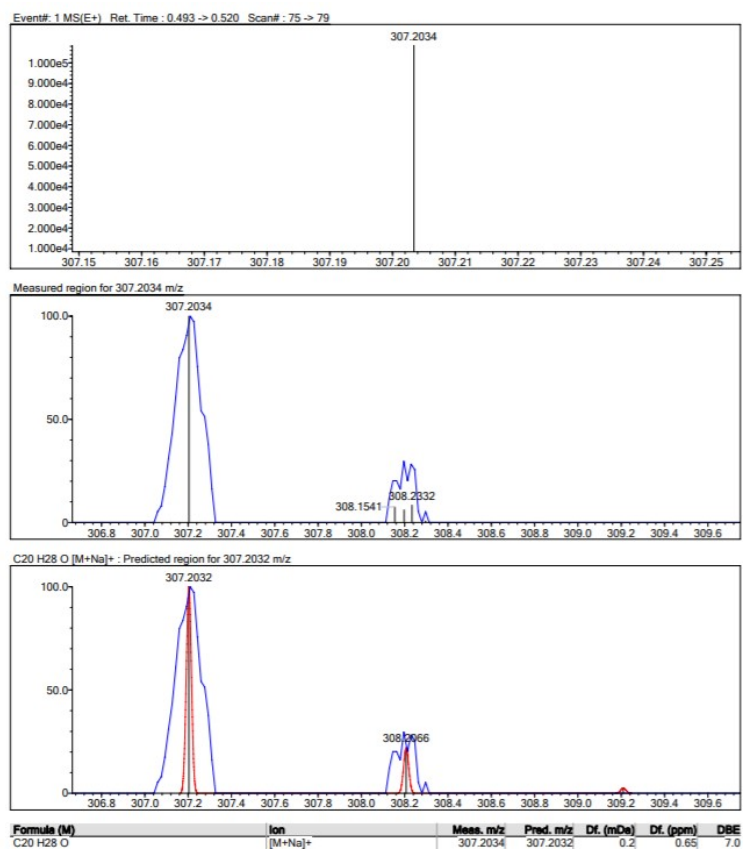

Figure S16. HRESIMS spectrum of hypoestin A (1).



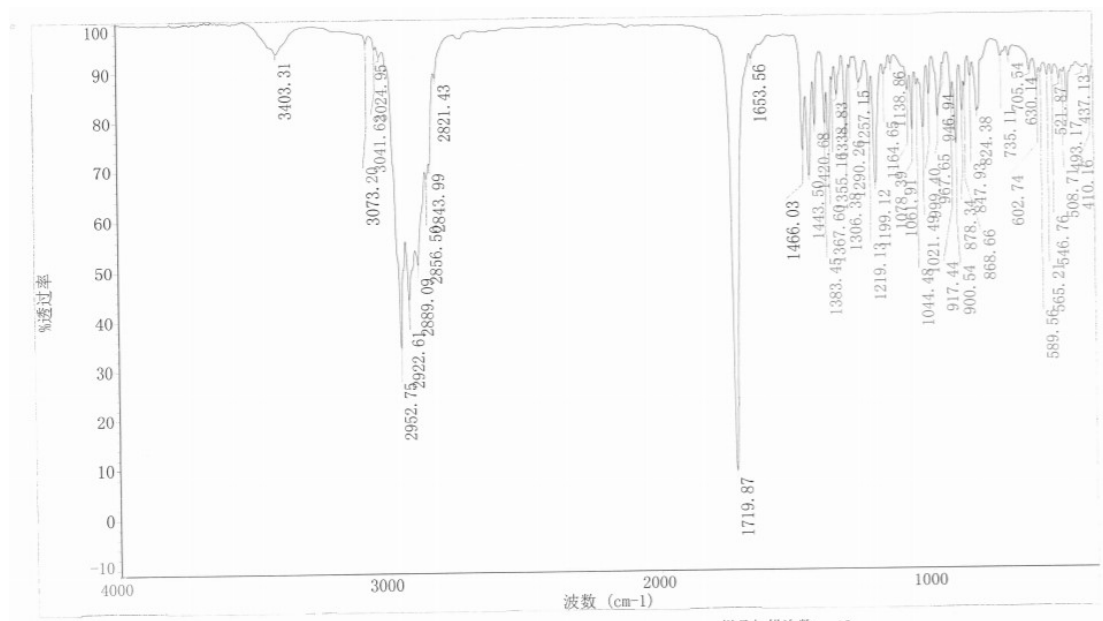

Figure S17. IR spectrum of hypoestin A (1).

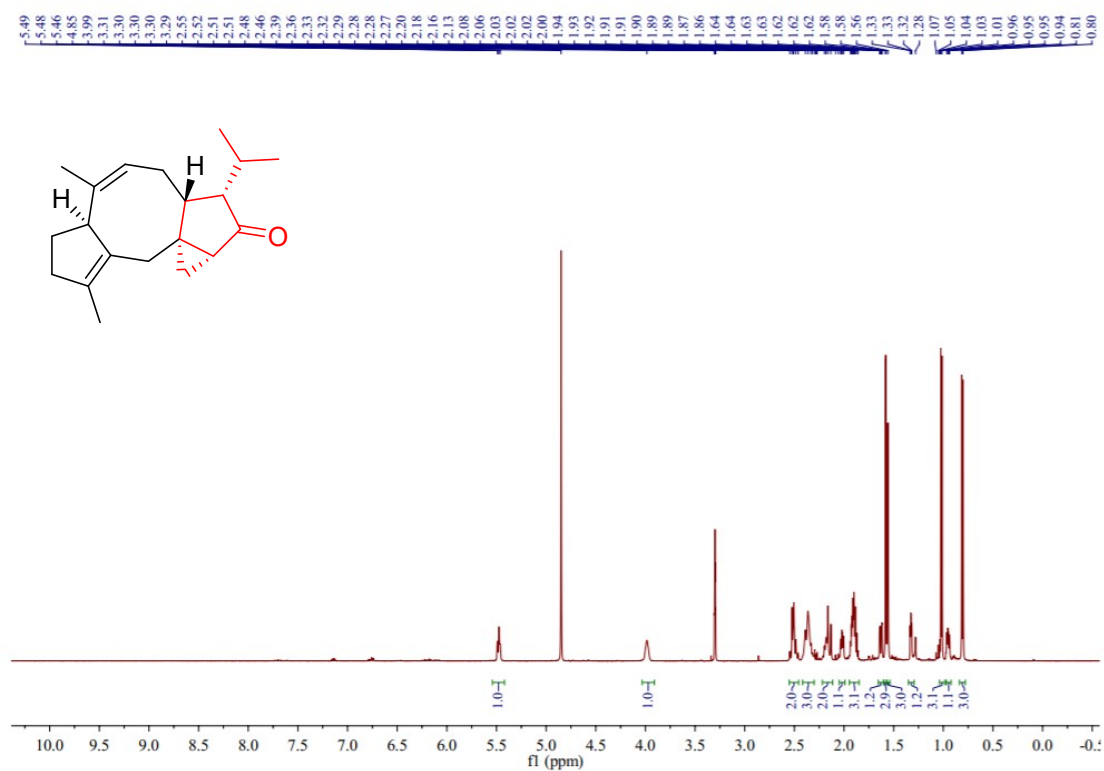

Figure S18.  $^1\text{H}$  NMR (500 MHz) spectrum of hypoestin B (2) in methanol- $d_4$ .

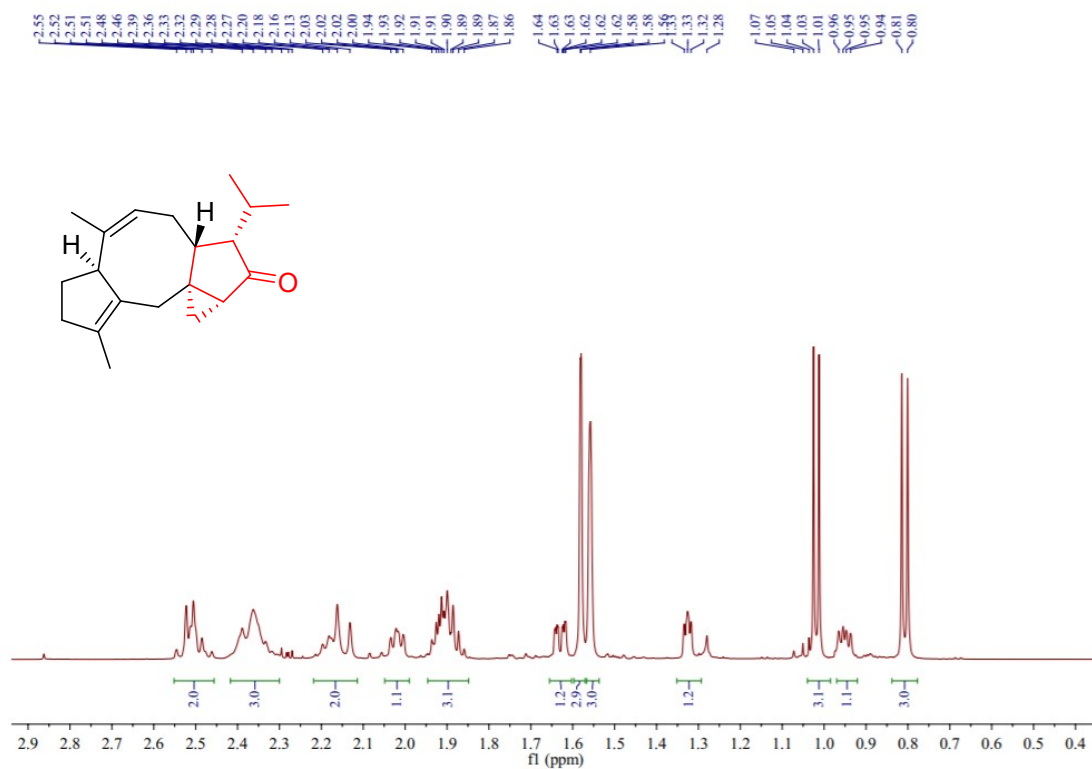

**Figure S19.** Expanded <sup>1</sup>H NMR spectrum of hypoestin B (2).

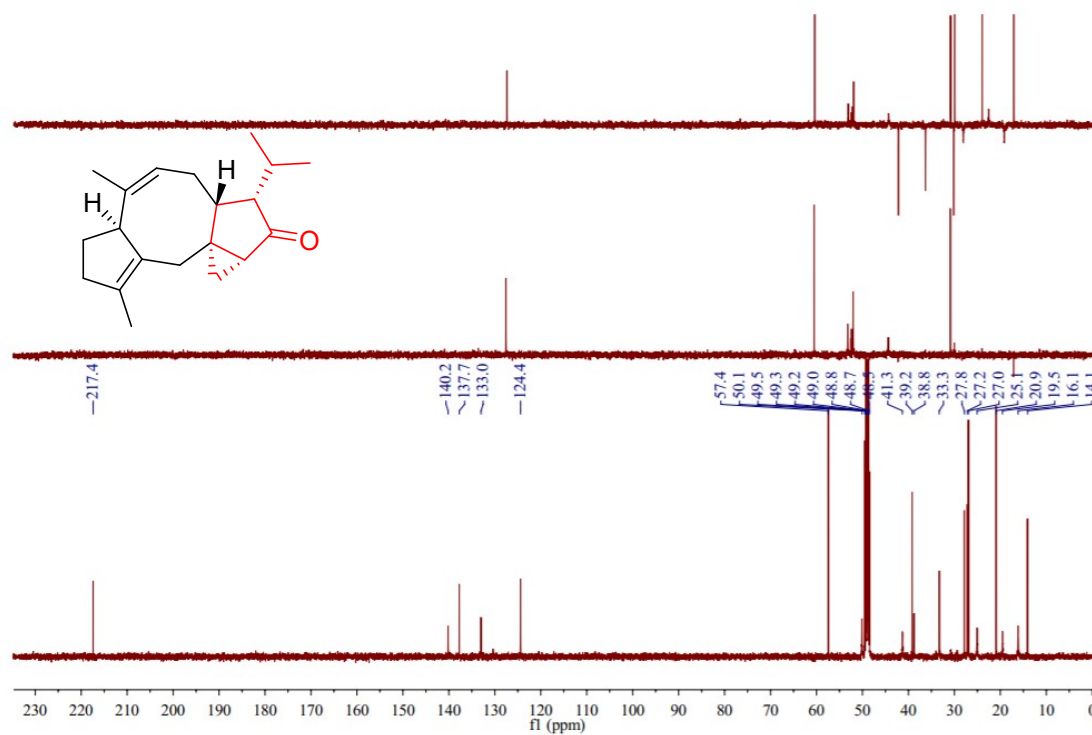

**Figure S20.** <sup>13</sup>C NMR and DEPT (125 MHz) spectra of hypoestin B (2) in methanol-*d*<sub>4</sub>.

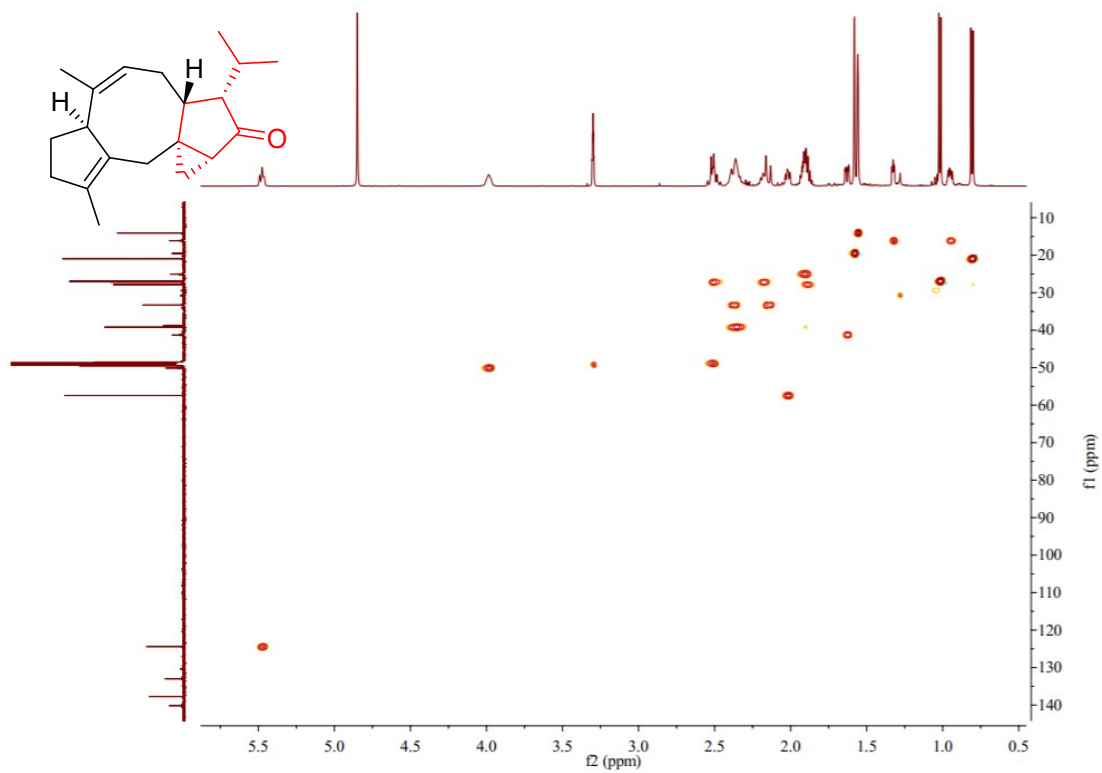

Figure S21. HSQC spectrum of hypoestin B (2).

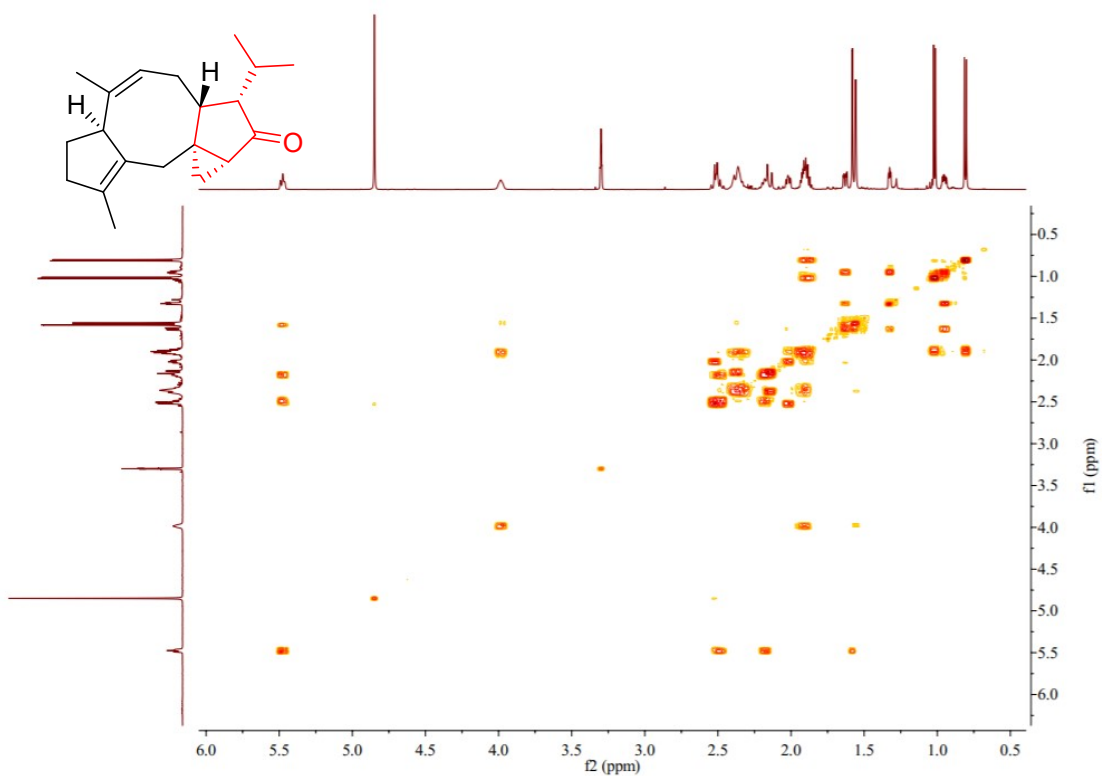

Figure S22.  $^1\text{H}$ - $^1\text{H}$  COSY spectrum of hypoestin B (2).

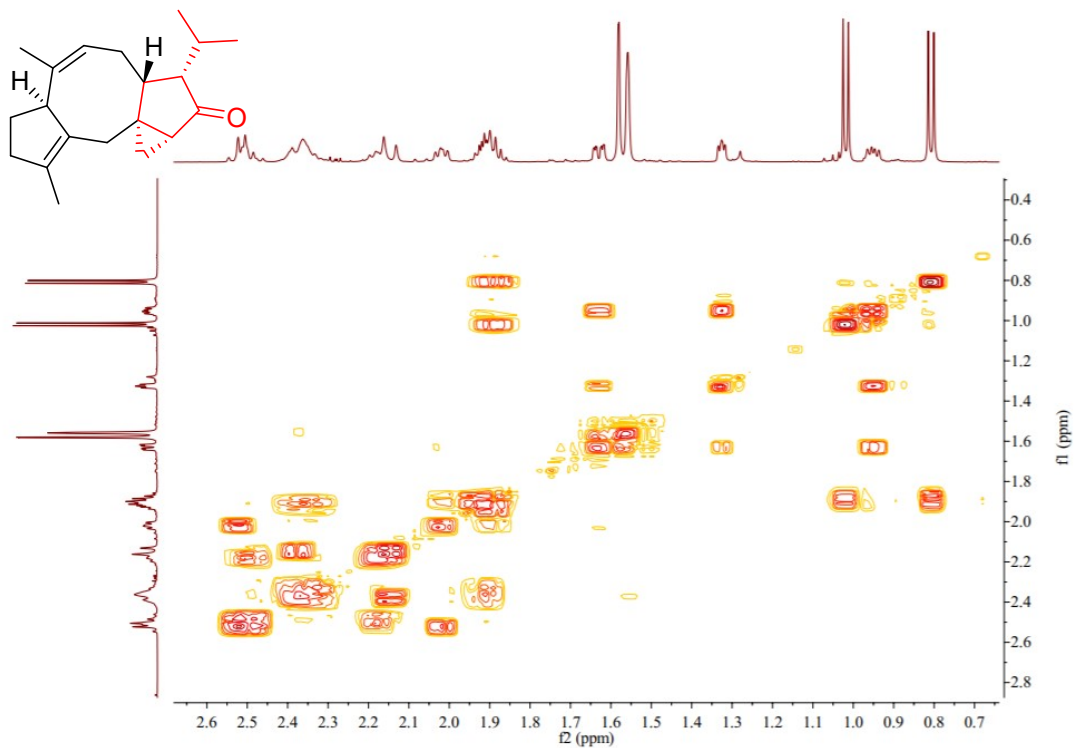

**Figure S23.** Expanded  $^1\text{H}$ - $^1\text{H}$  COSY spectrum of hypoestin B (**2**).

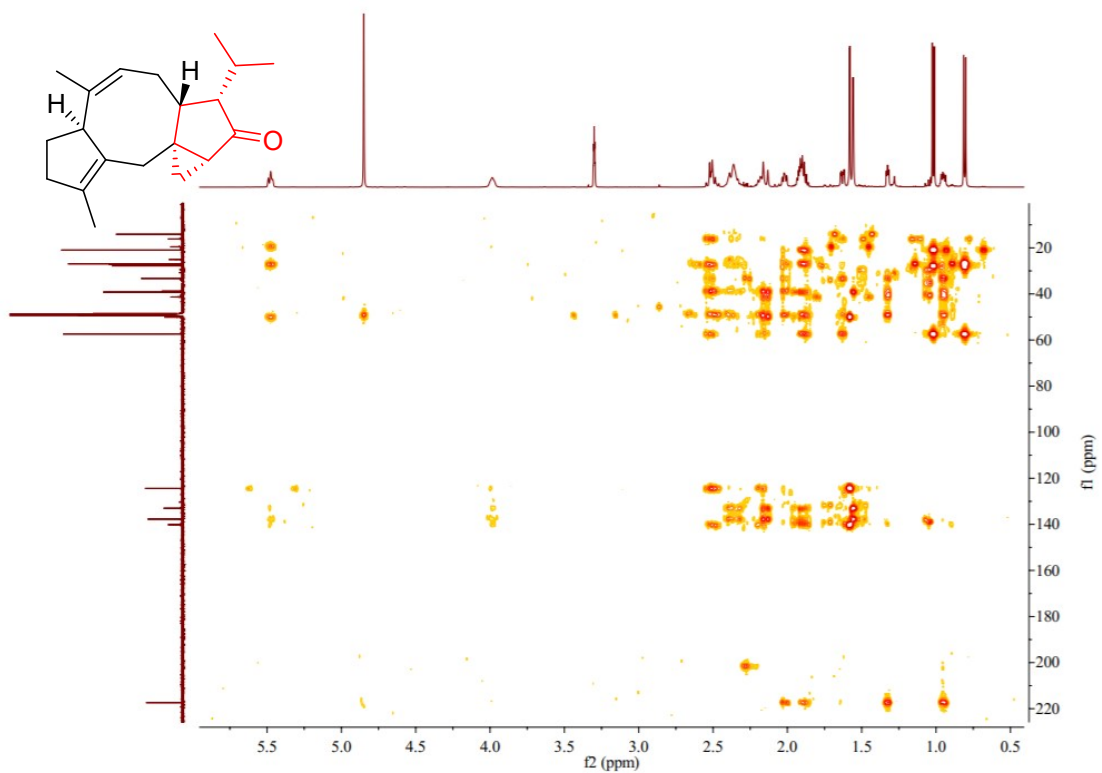

**Figure S24.** HMBC spectrum of hypoestin B (**2**).

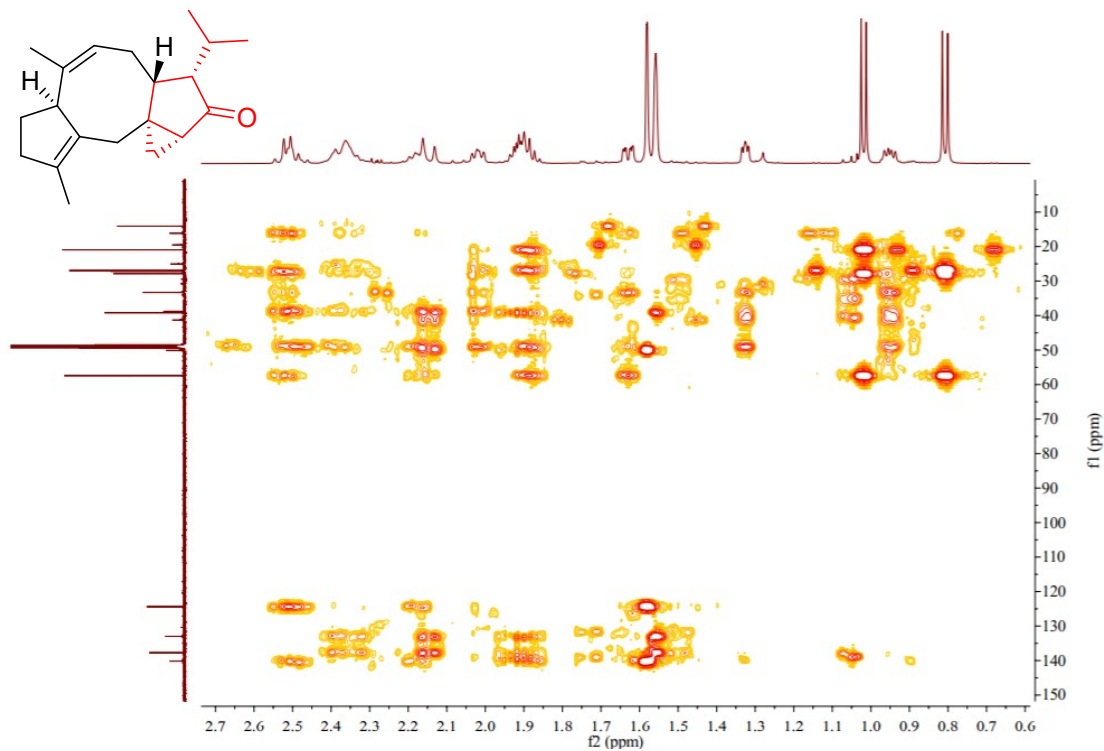

**Figure S25.** Expanded HMBC spectrum of hypoestin B (2).

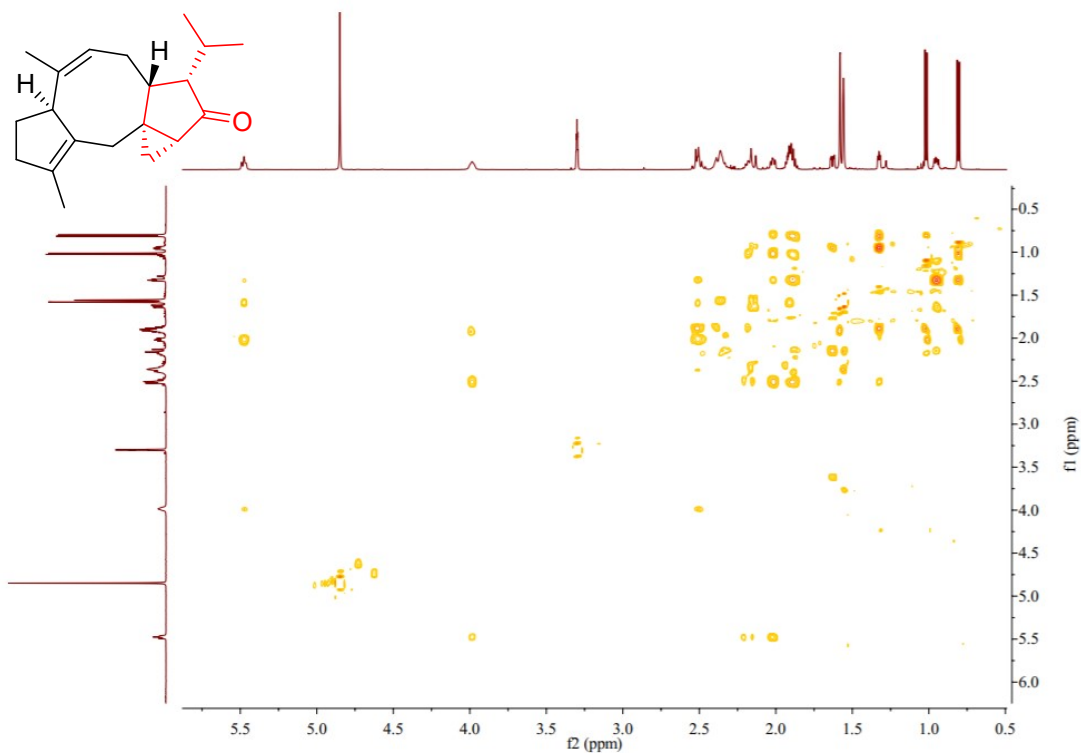

**Figure S26.** ROESY spectrum of hypoestin B (2).

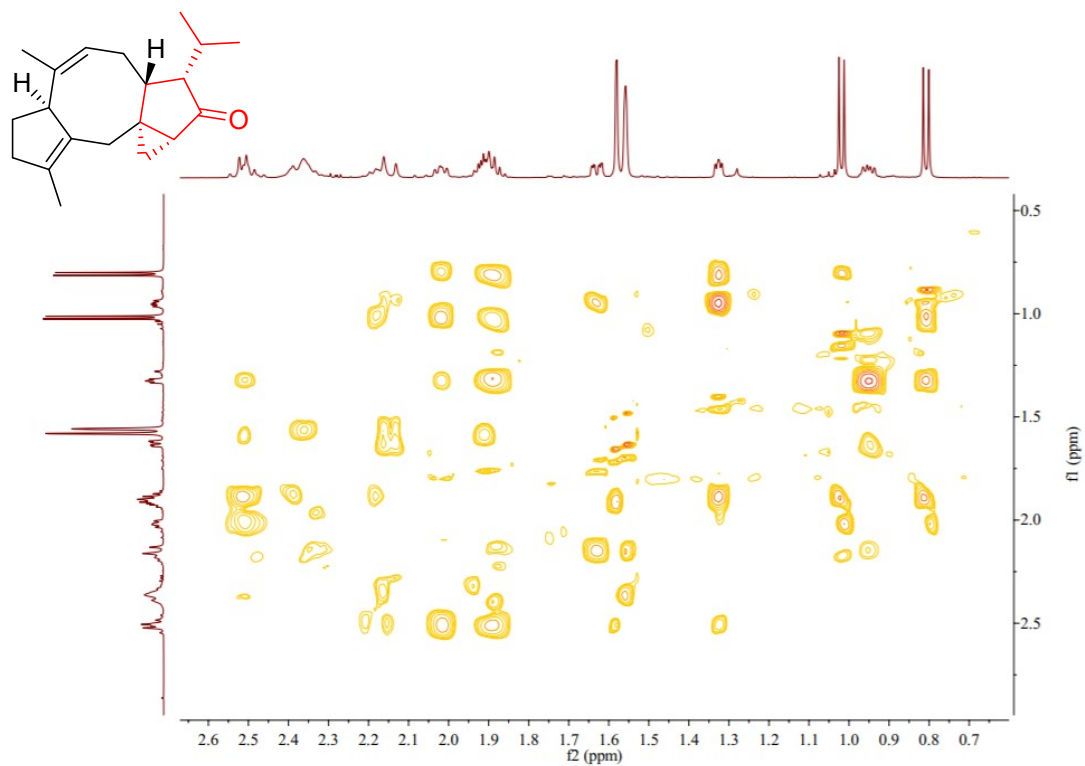

**Figure S27.** Expanded ROESY spectrum of hypoestin B (2).

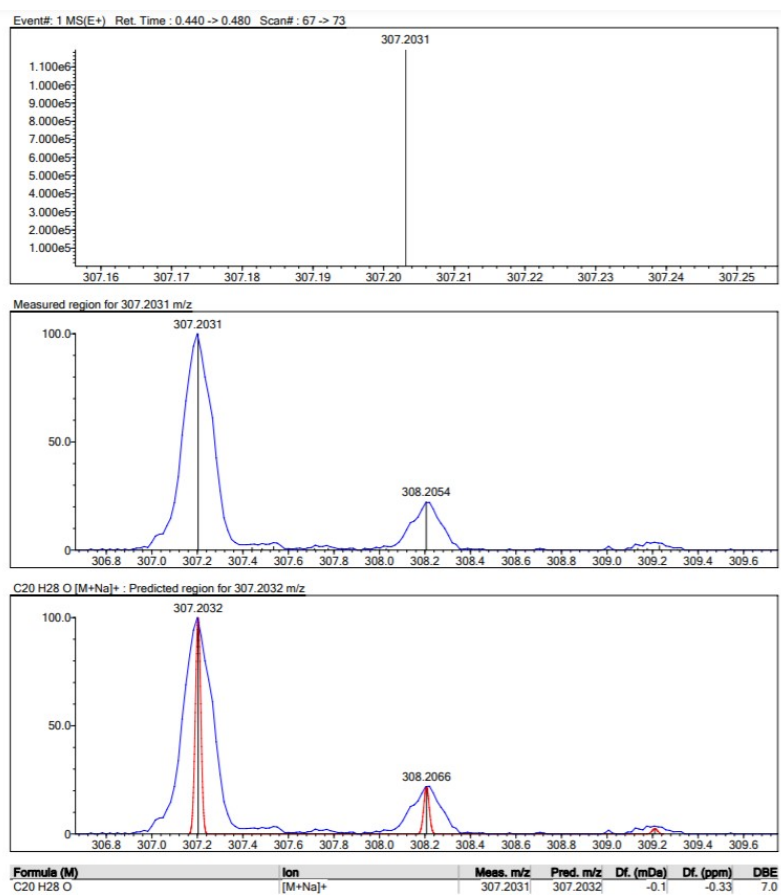

**Figure S28.** HRESIMS spectrum of hypoestin B (2).

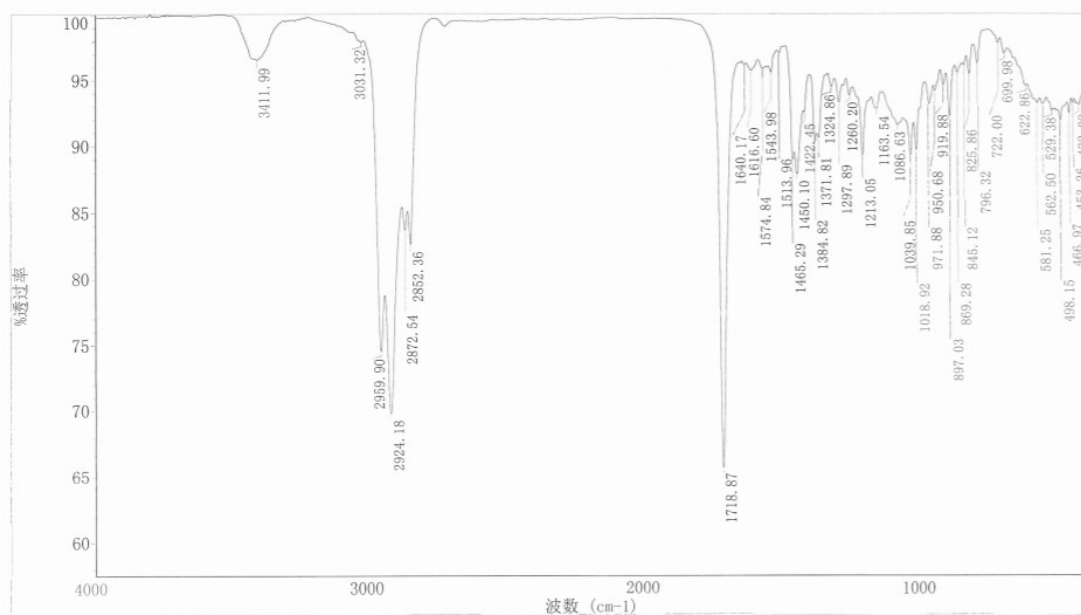

Figure S29. IR spectrum of hypoestin B (2).

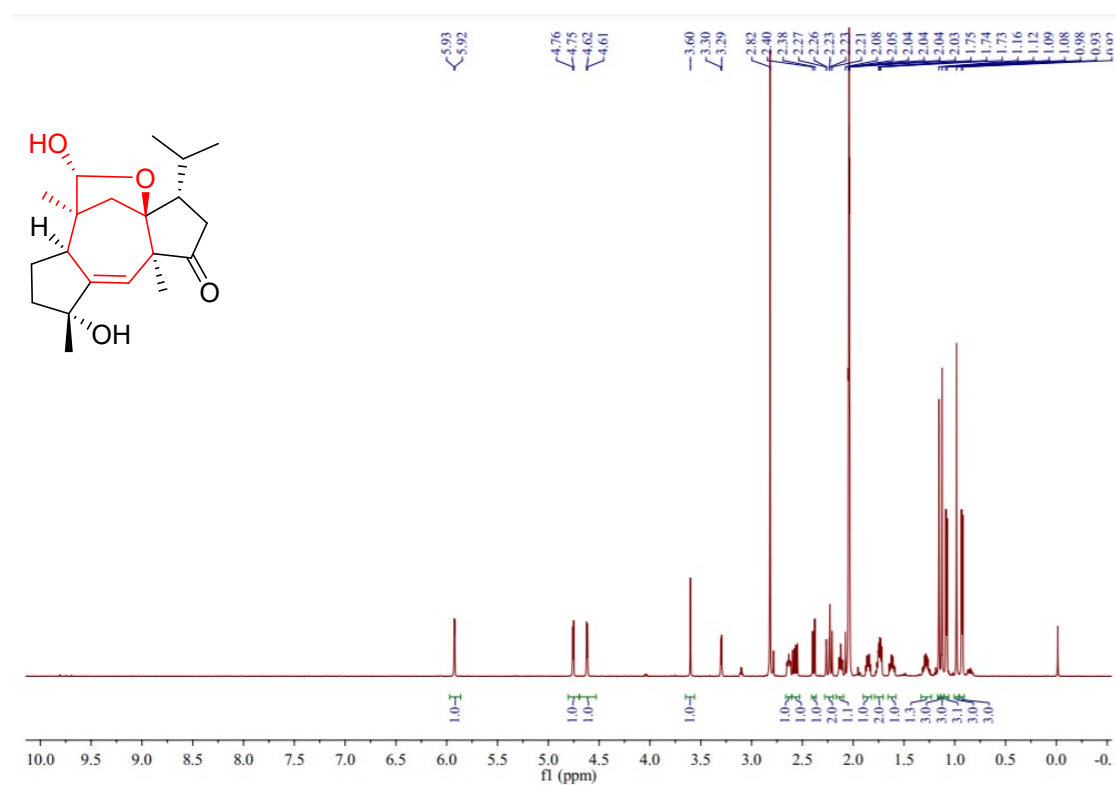

Figure S30. <sup>1</sup>H NMR (500 MHz) spectrum of hypoestin C (3) in acetone-*d*<sub>6</sub>.

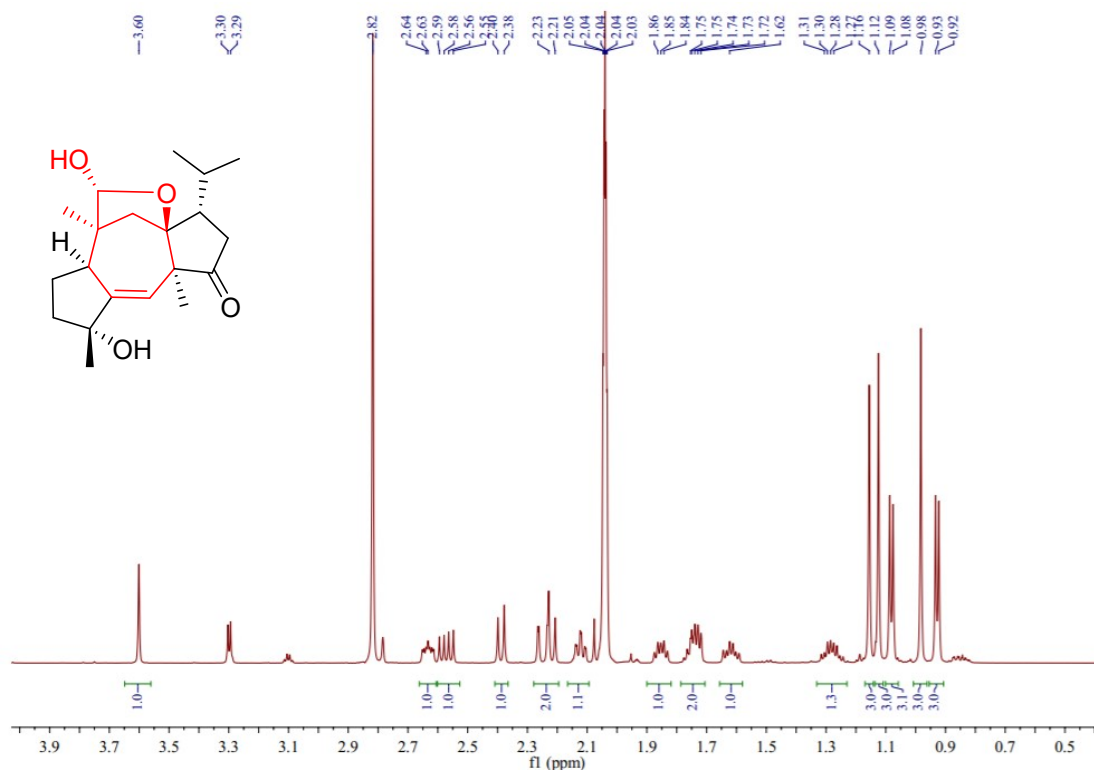

**Figure S31.** Expanded  $^1\text{H}$  NMR spectrum of hypoestin C (**3**).

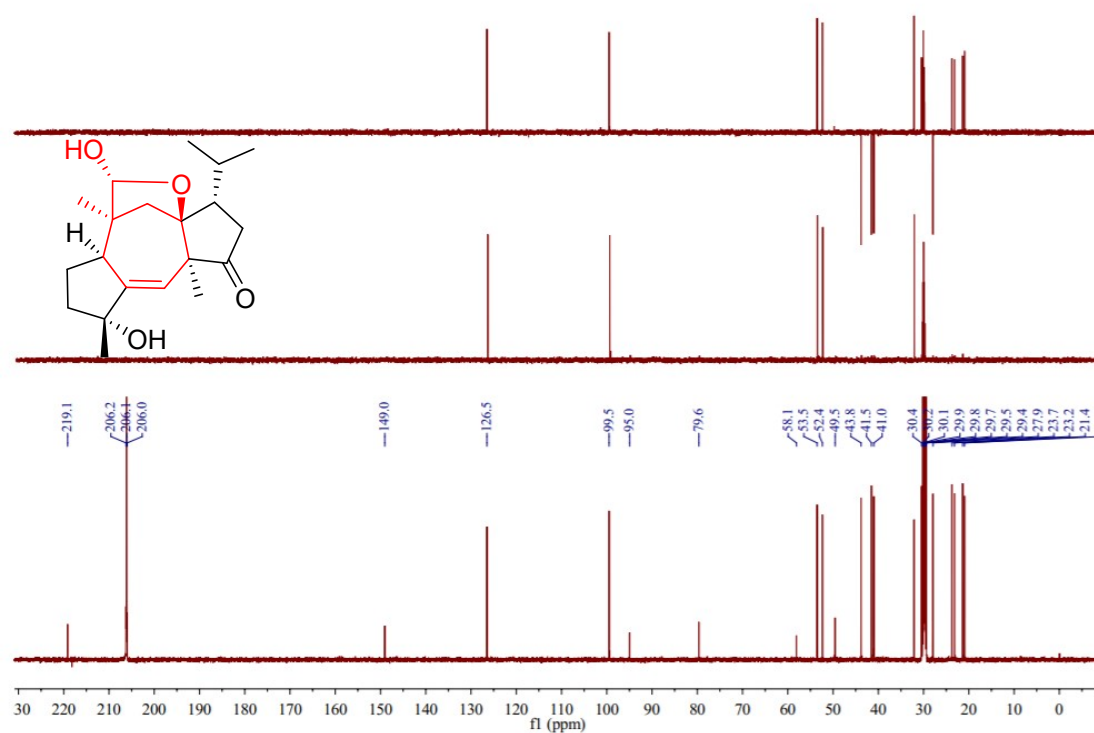

**Figure S32.**  $^{13}\text{C}$  NMR and DEPT (125 MHz) spectra of hypoestin C (**3**) in acetone- $d_6$ .



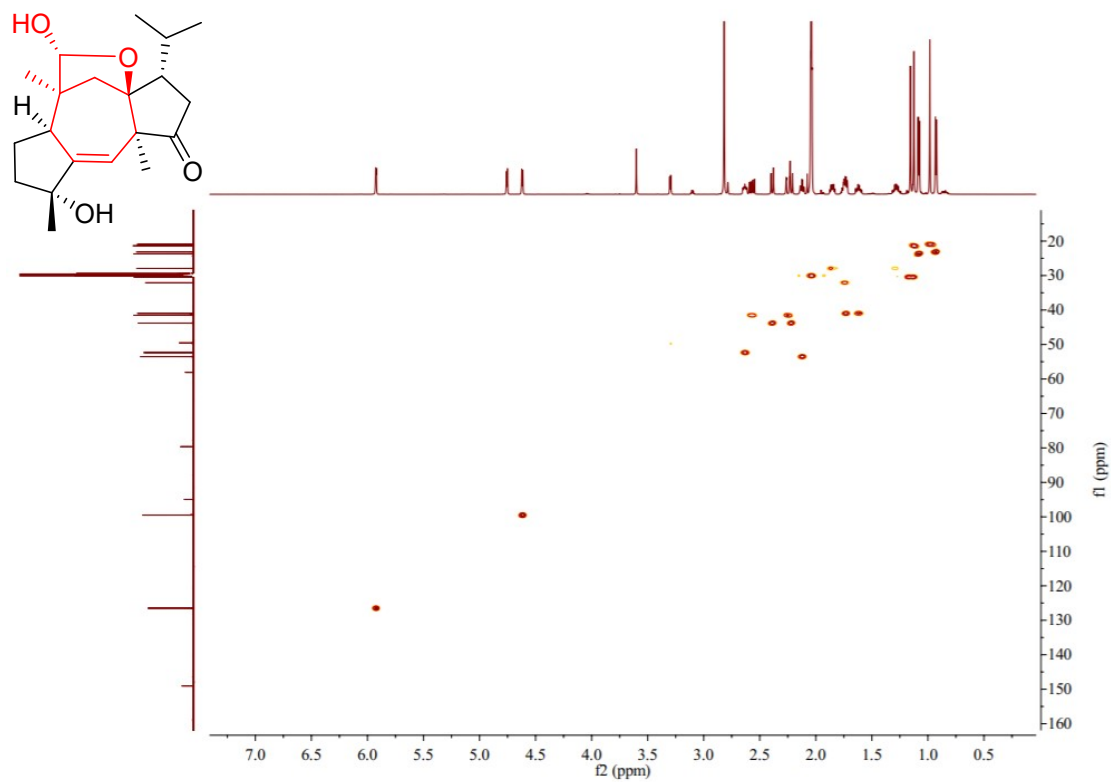

**Figure S33.** HSQC spectrum of hypoestin C (**3**).

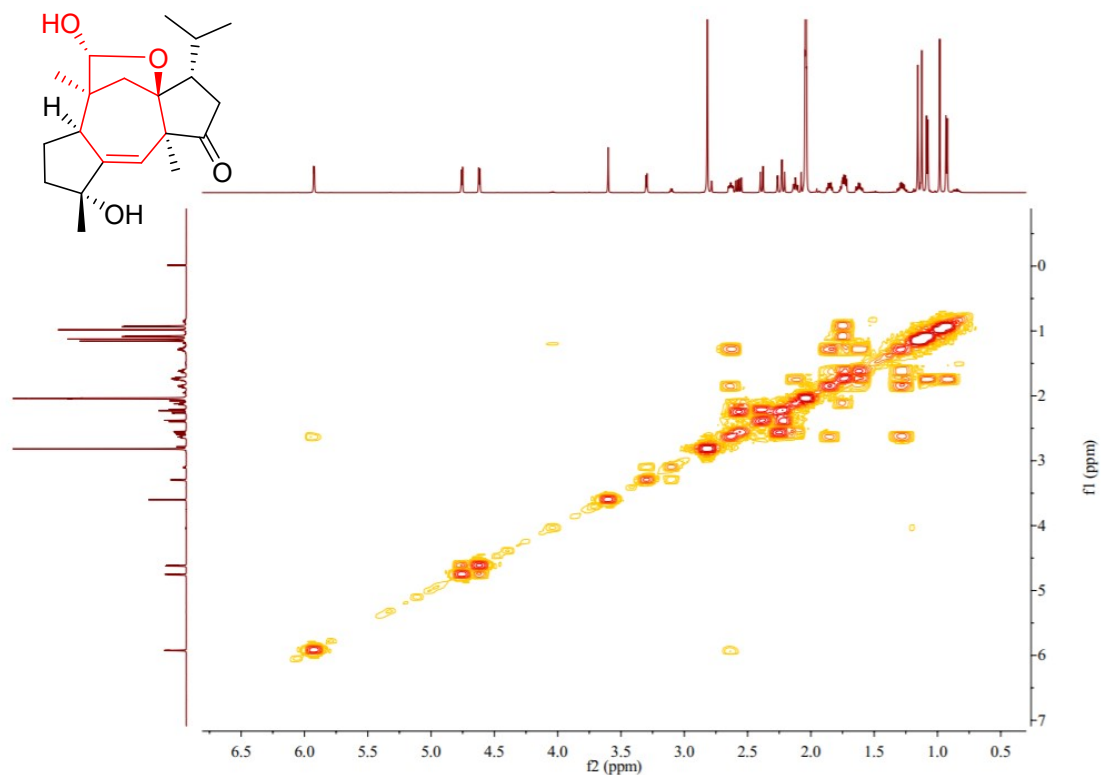

**Figure S34.**  $^1\text{H}$ - $^1\text{H}$  COSY spectrum of hypoestin C (**3**).

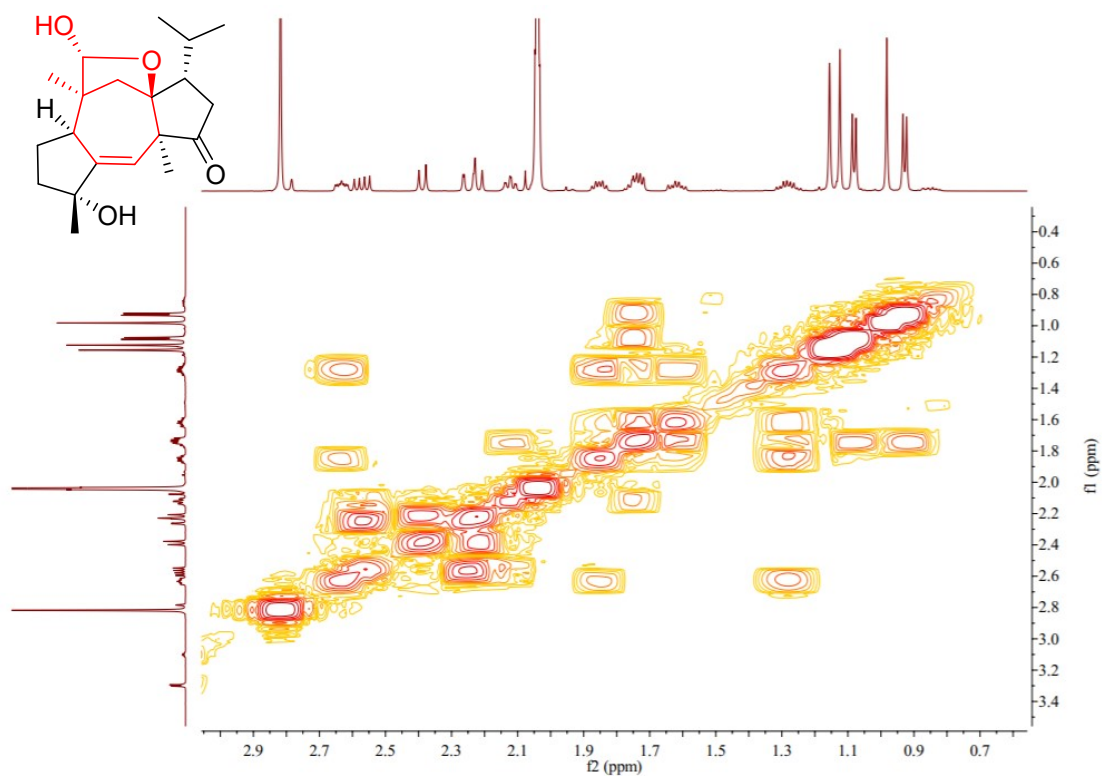

**Figure S35.** Expanded  $^1\text{H}$ - $^1\text{H}$  COSY spectrum of hypoestin C (3).

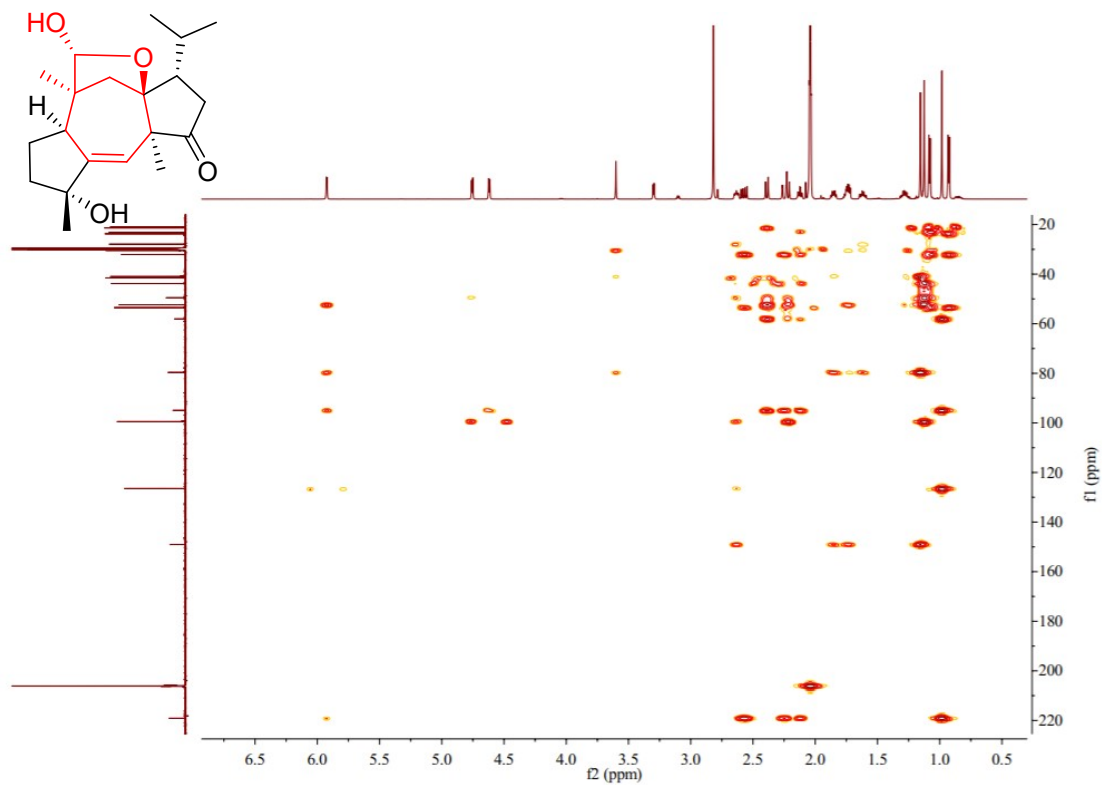

**Figure S36.** HMBC spectrum of hypoestin C (3).

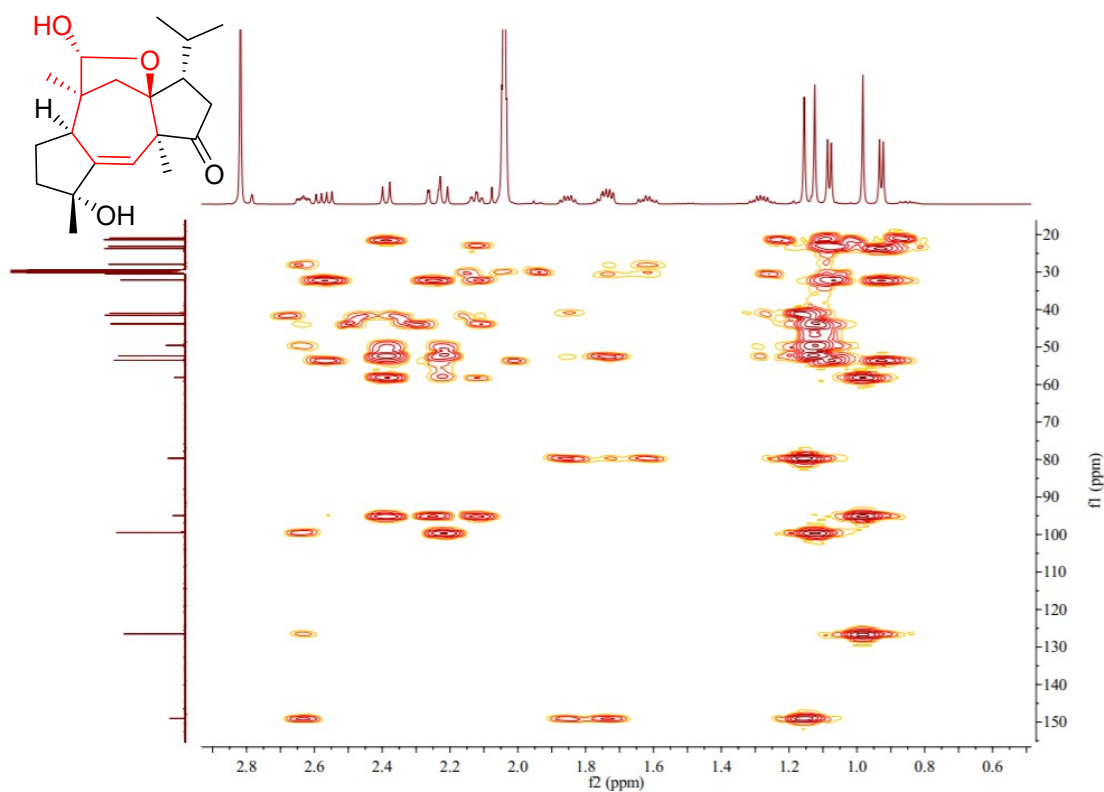

**Figure S37.** Expanded HMBC spectrum of hypoestin C (**3**).

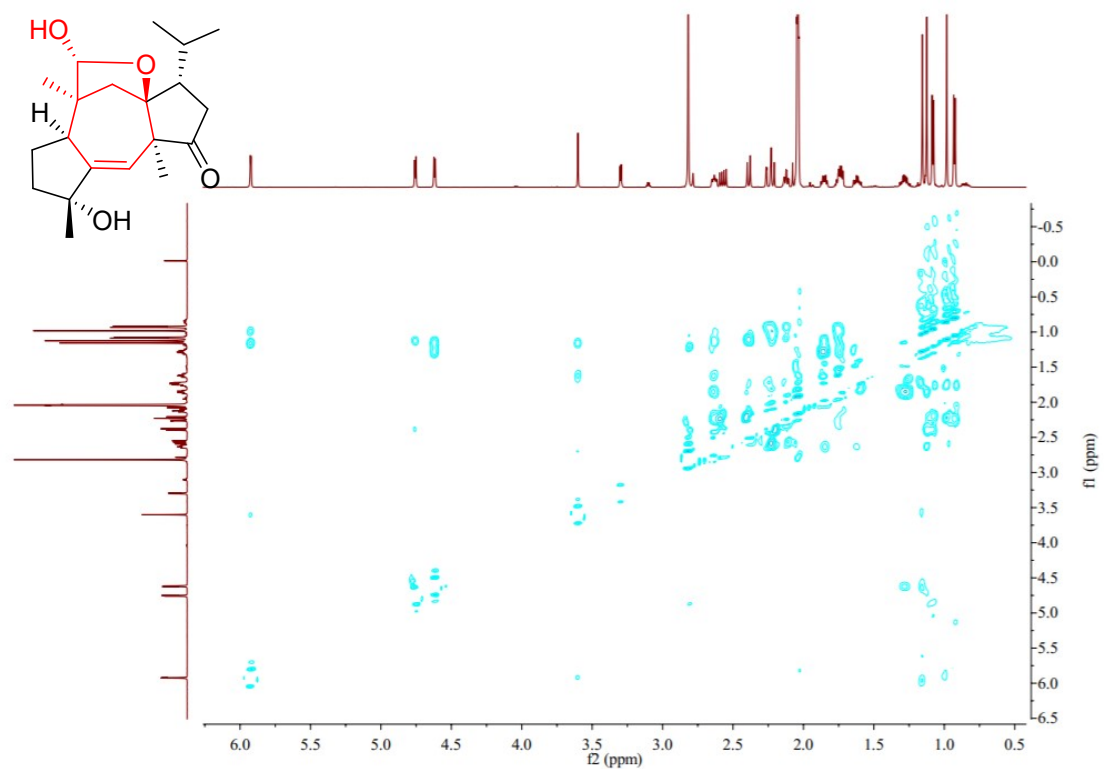

**Figure S38.** ROESY spectrum of hypoestin C (**3**).

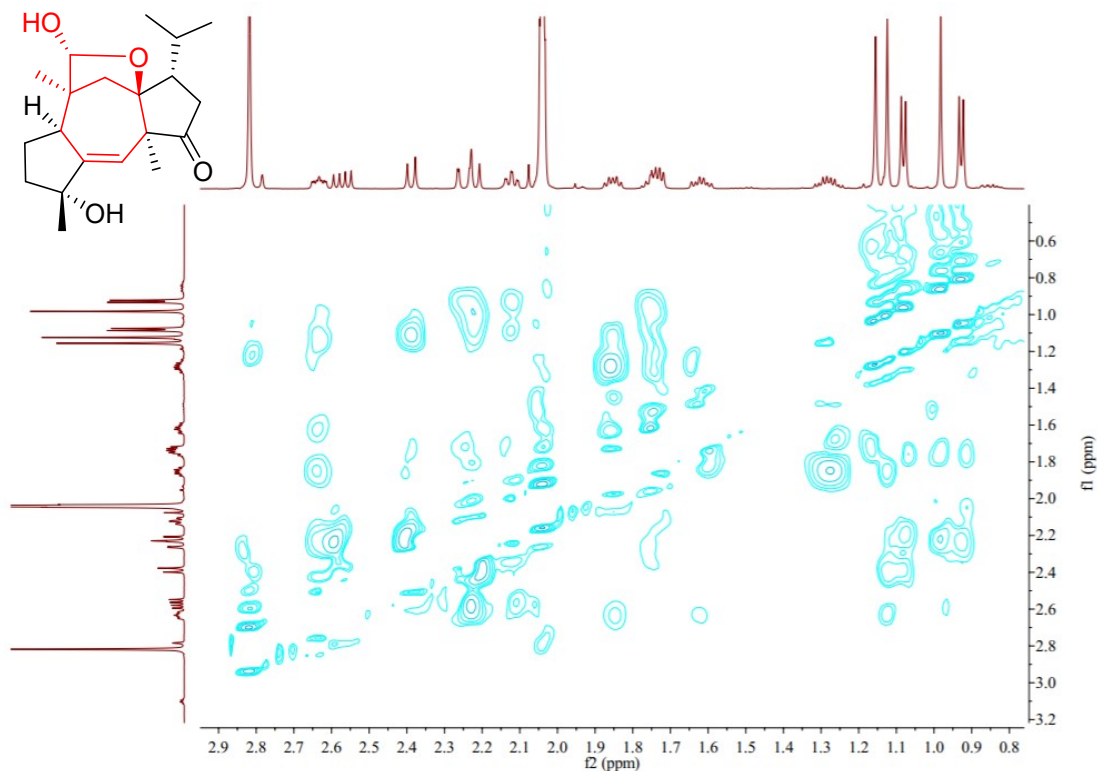

Figure S39. Expanded ROESY spectrum of hypoestin C (3).

#### User Spectra

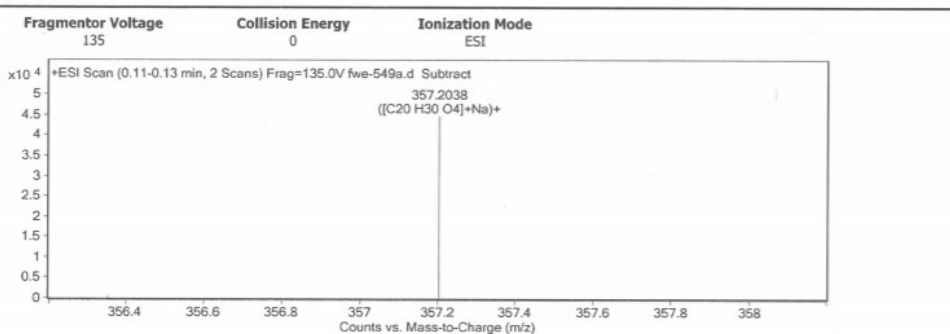

#### Peak List

| m/z      | z | Abund     | Formula                                        | Ion                 |
|----------|---|-----------|------------------------------------------------|---------------------|
| 271.2057 | 1 | 63990.41  |                                                |                     |
| 272.2096 | 1 | 12761.14  |                                                |                     |
| 299.2007 | 1 | 73951.92  |                                                |                     |
| 300.2038 | 1 | 15003.91  |                                                |                     |
| 317.2117 | 1 | 140210.34 |                                                |                     |
| 318.2151 | 1 | 28337.52  |                                                |                     |
| 357.2038 | 1 | 44674.82  | C <sub>20</sub> H <sub>30</sub> O <sub>4</sub> | (M+Na) <sup>+</sup> |
| 373.1786 | 1 | 12506.43  |                                                |                     |
| 455.1791 | 1 | 9210.98   |                                                |                     |
| 691.4183 | 1 | 9094.21   |                                                |                     |

#### Formula Calculator Element Limits

| Element | Min | Max |
|---------|-----|-----|
| C       | 3   | 60  |
| H       | 0   | 120 |
| O       | 0   | 30  |

#### Formula Calculator Results

| Formula                                        | CalculatedMass | CalculatedMz | Mz       | Diff. (mDa) | Diff. (ppm) | DBE    |
|------------------------------------------------|----------------|--------------|----------|-------------|-------------|--------|
| C <sub>20</sub> H <sub>30</sub> O <sub>4</sub> | 334.2144       | 357.2036     | 357.2038 | 0.0         | 0.1         | 6.0000 |

Figure S40. HRESIMS spectrum of hypoestin C (3).

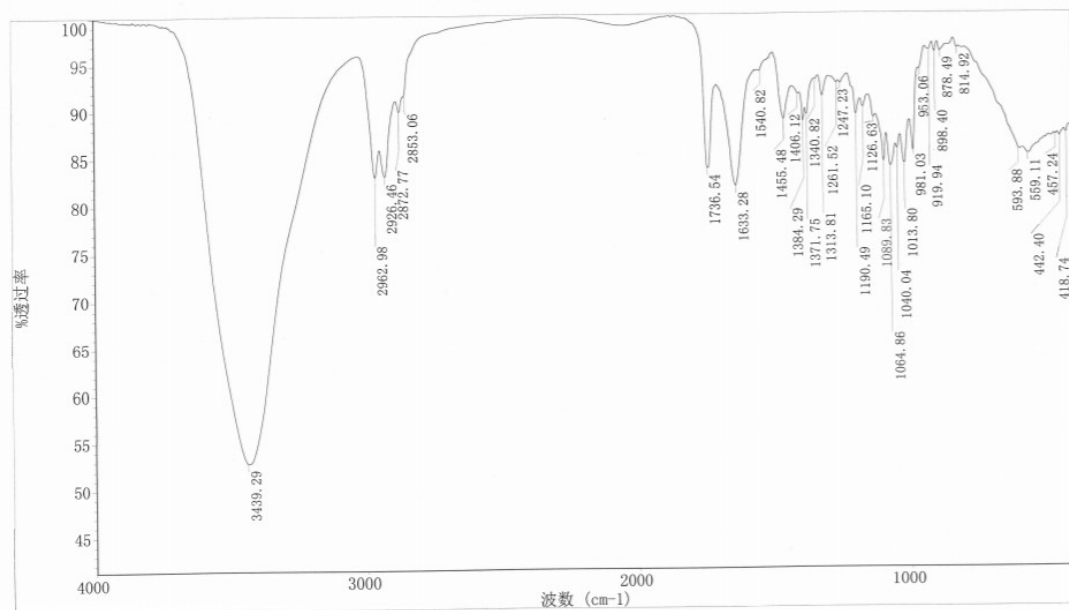

Figure S41. IR spectrum of hypoestin C (3).

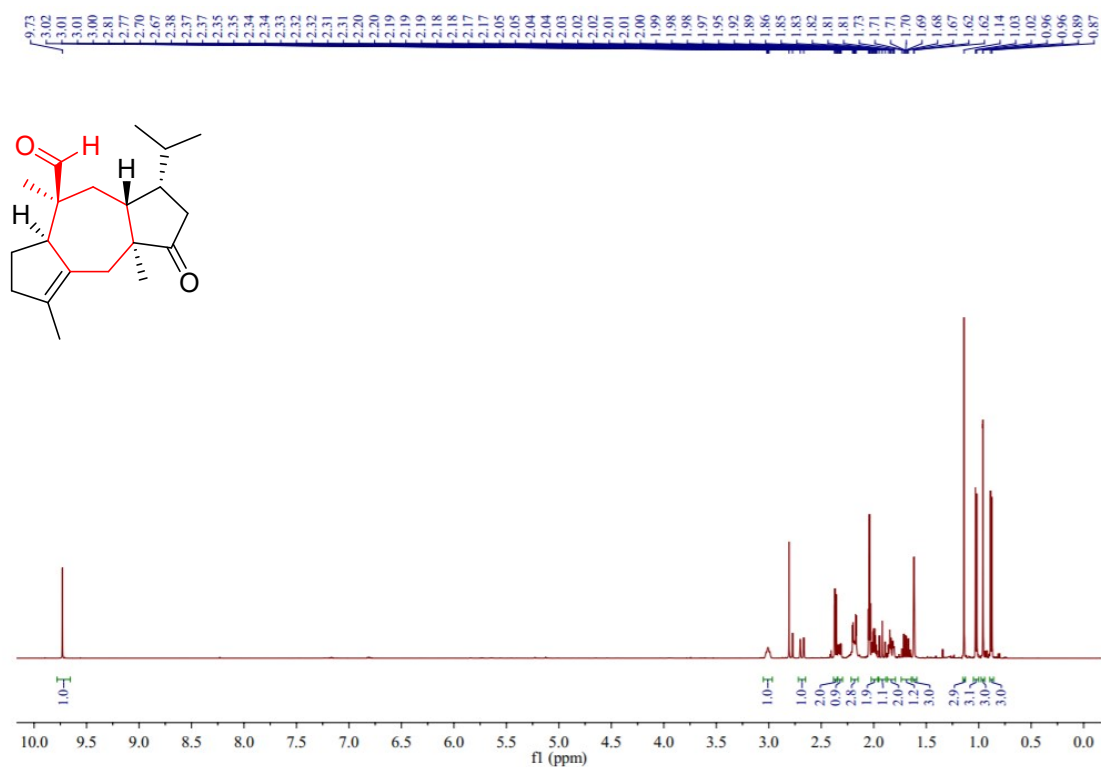

Figure S42. <sup>1</sup>H NMR (500 MHz) spectrum of hypoestin D (4) in acetone-*d*<sub>6</sub>.

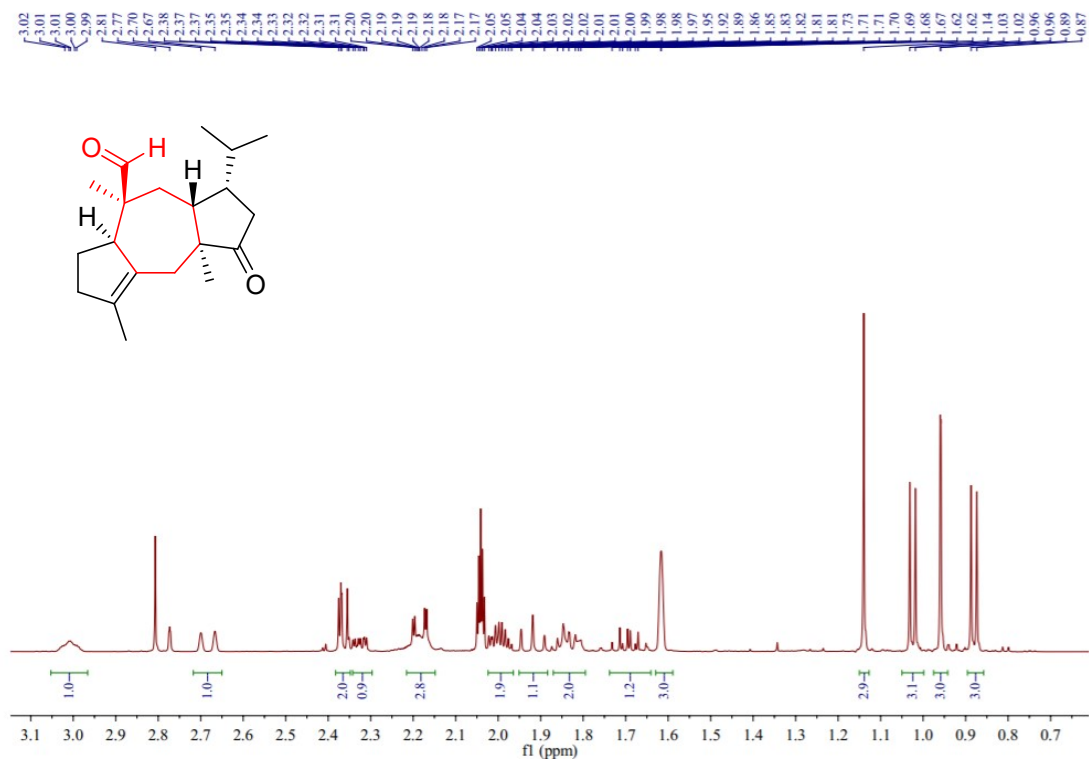

Figure S43. Expanded <sup>1</sup>H NMR spectrum of hypoestin D (4).

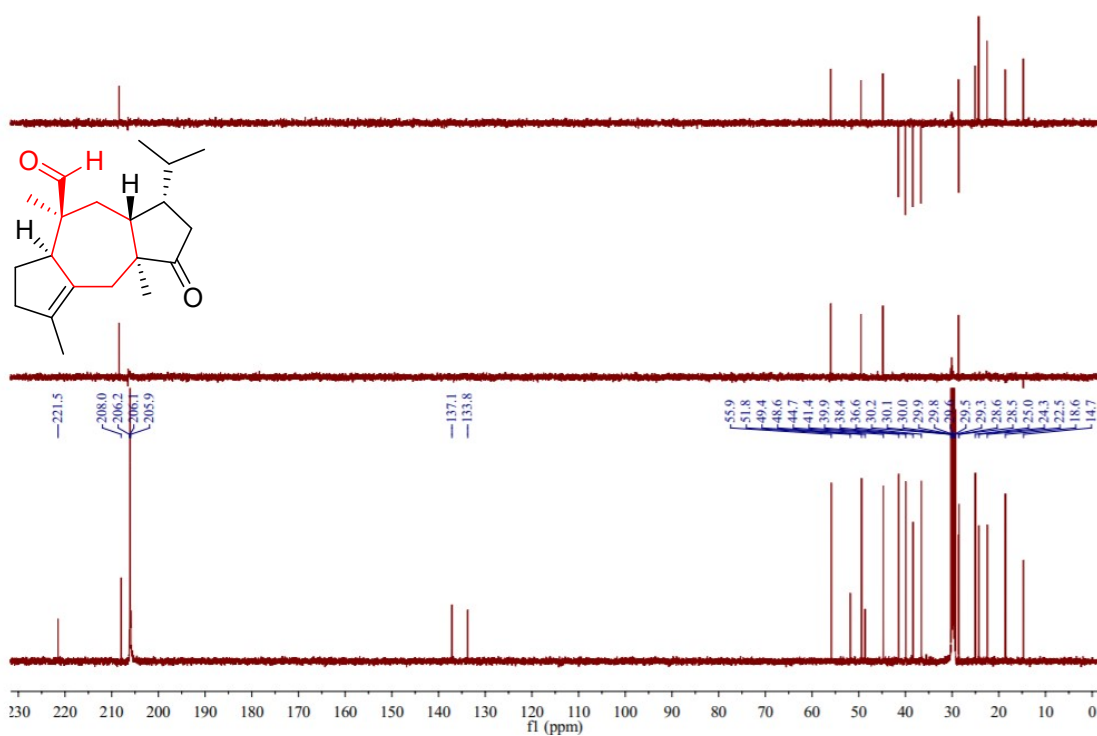

Figure S44. <sup>13</sup>C NMR and DEPT (125 MHz) spectra of hypoestin D (4) in acetone-*d*<sub>6</sub>.

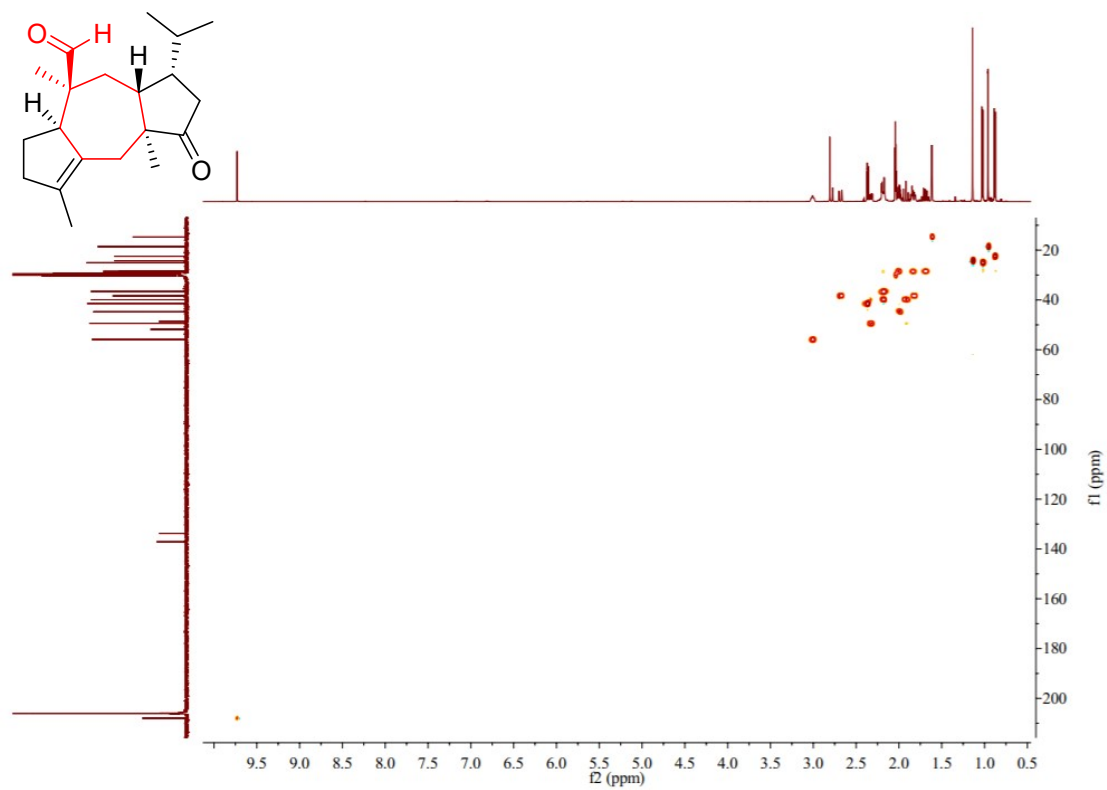

**Figure S45.** HSQC spectrum of hypoestin D (4).

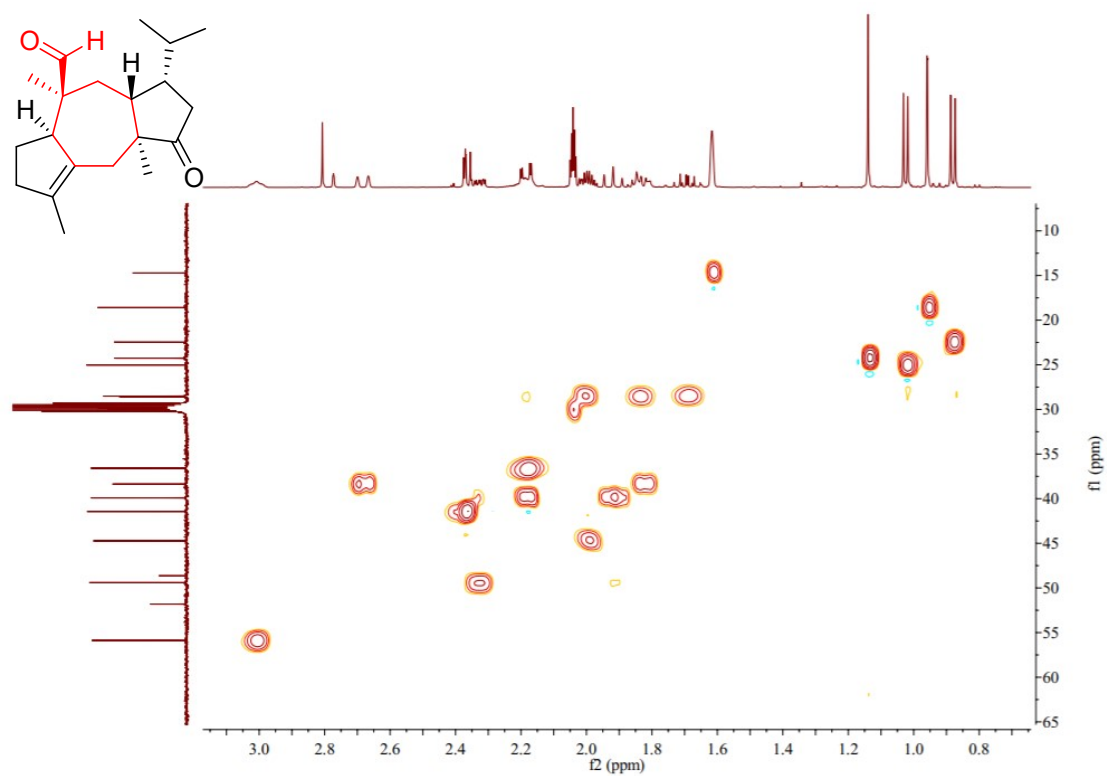

**Figure S46.** Expanded HSQC spectrum of hypoestin D (4).

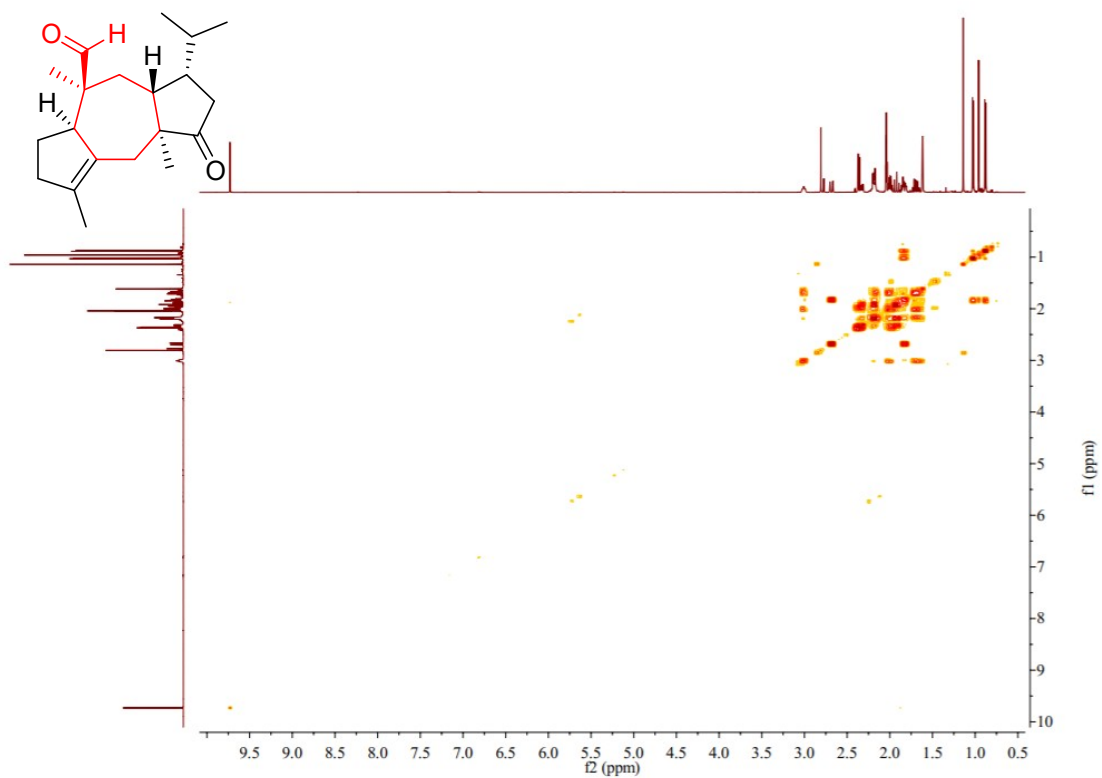

**Figure S47.**  $^1\text{H}$ - $^1\text{H}$  COSY spectrum of hypoestin D (**4**).

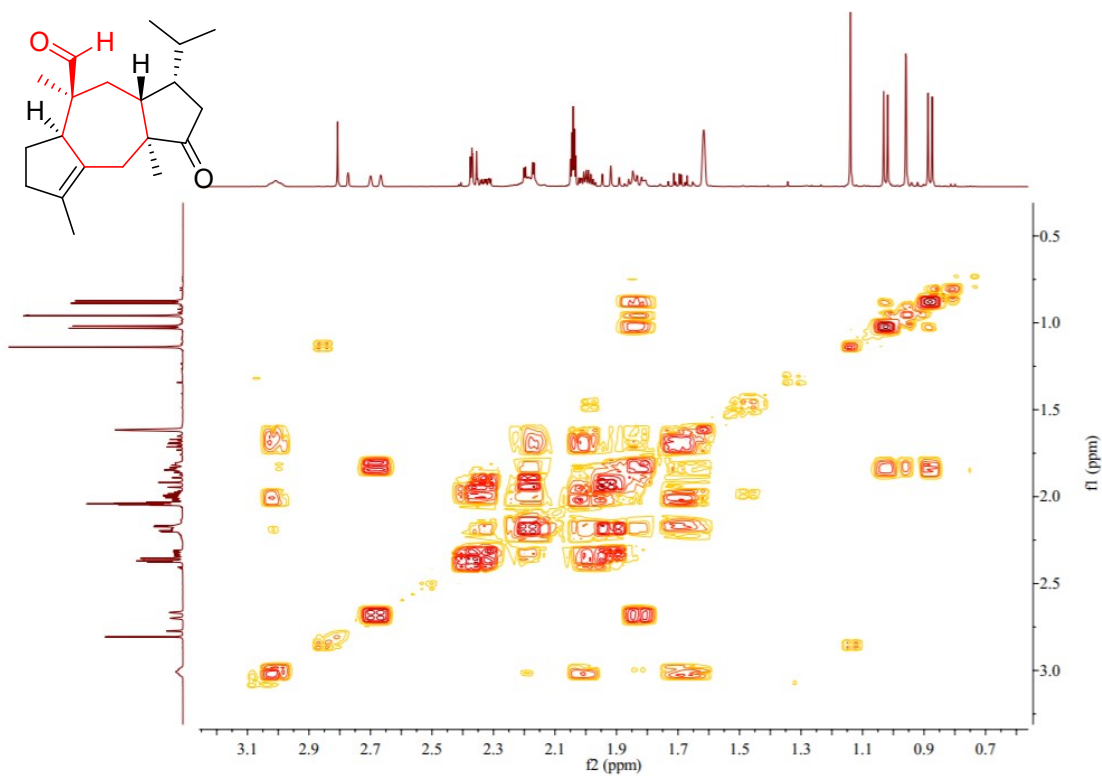

**Figure S48.** Expanded  $^1\text{H}$ - $^1\text{H}$  COSY spectrum of hypoestin D (**4**).



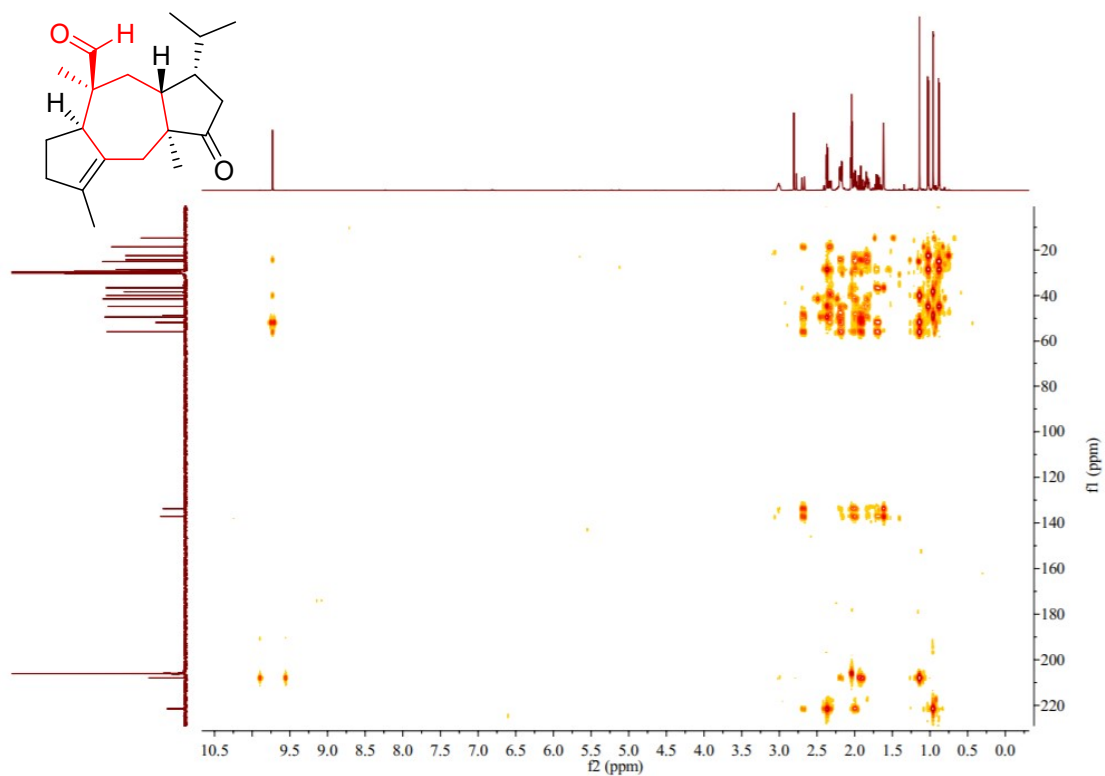

**Figure S49.** HMBC spectrum of hypoestin D (4).

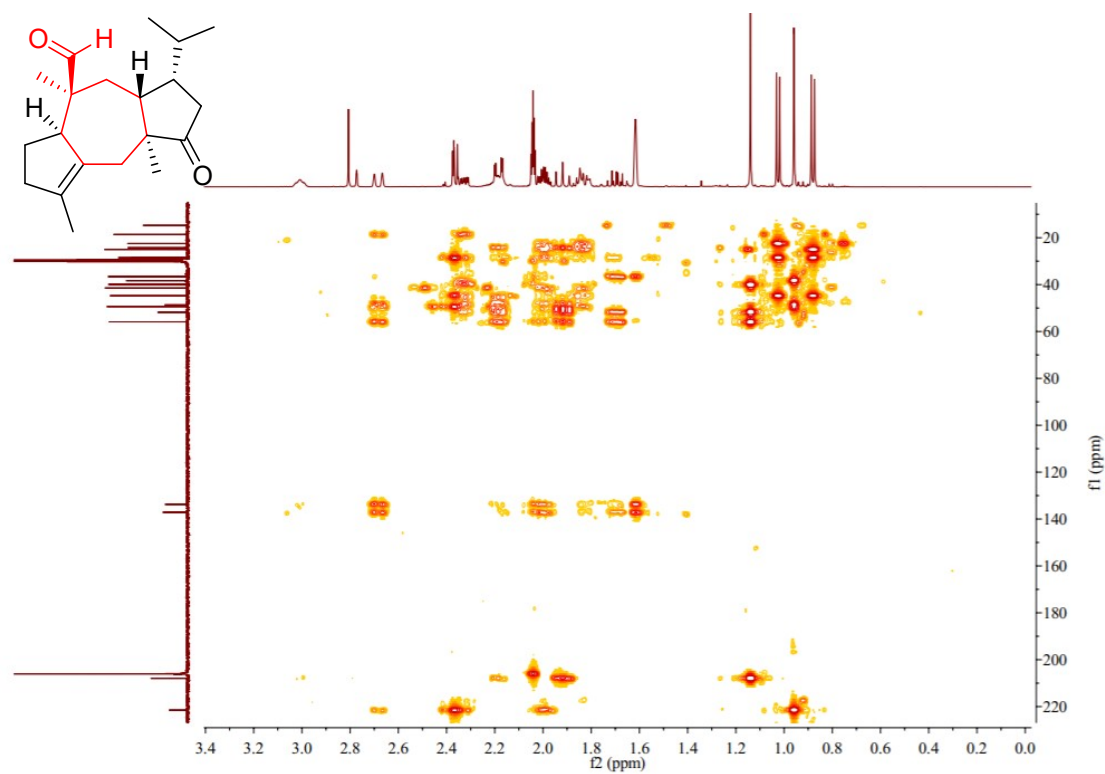

**Figure S50.** Expanded HMBC spectrum of hypoestin D (4).

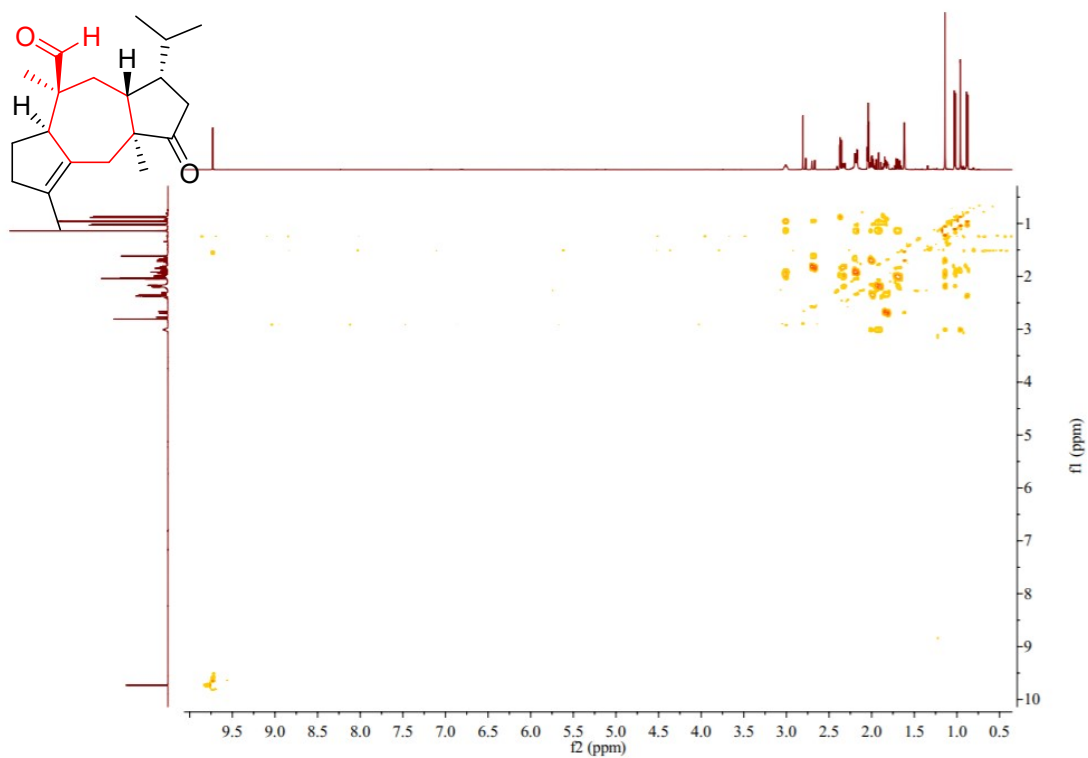

**Figure S51.** ROESY spectrum of hypoestin D (**4**).

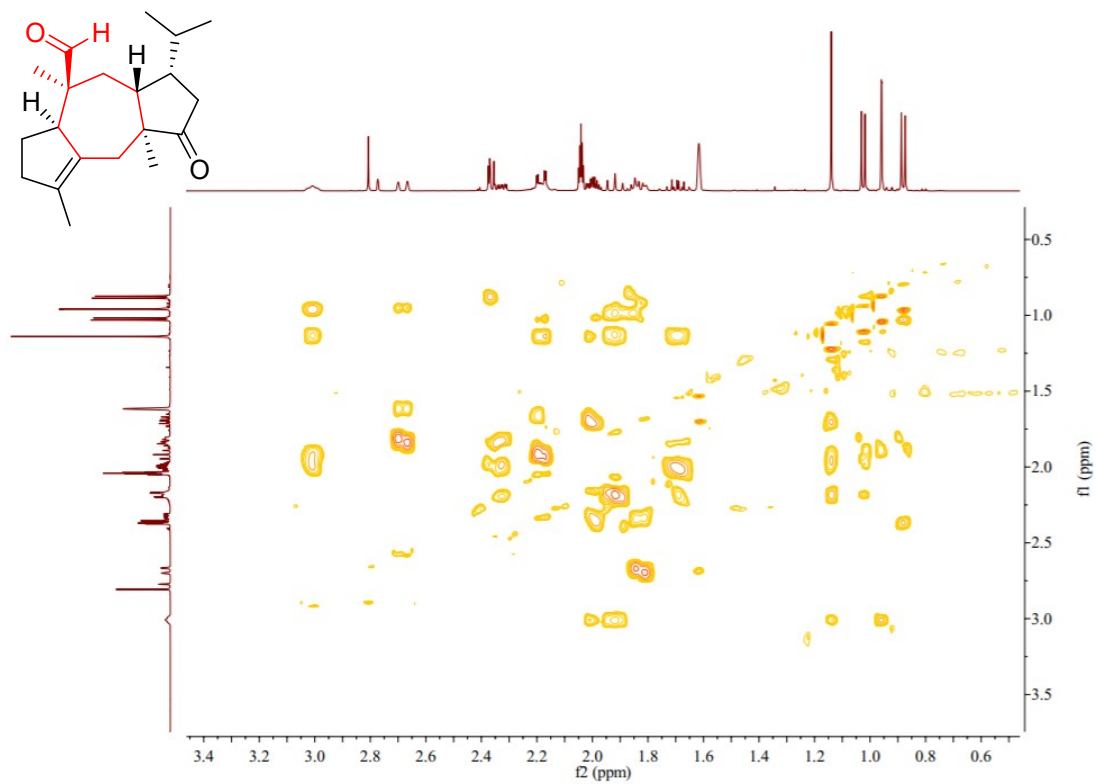

**Figure S52.** Expanded ROESY spectrum of hypoestin D (**4**).

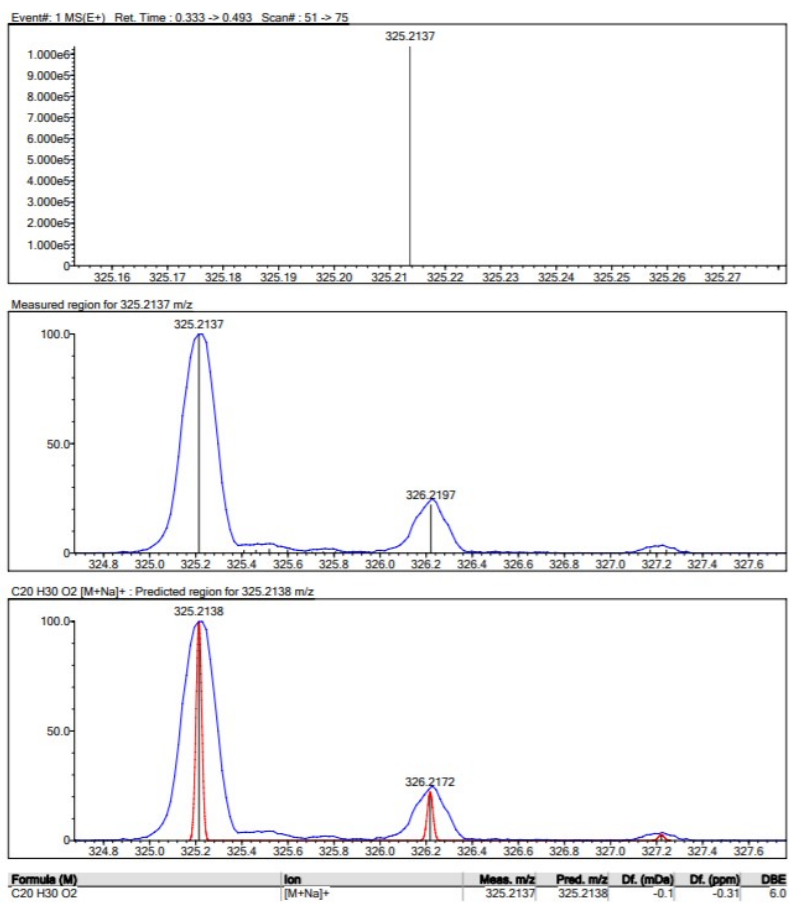

Figure S53. HRESIMS spectrum of hypoestin D (4).

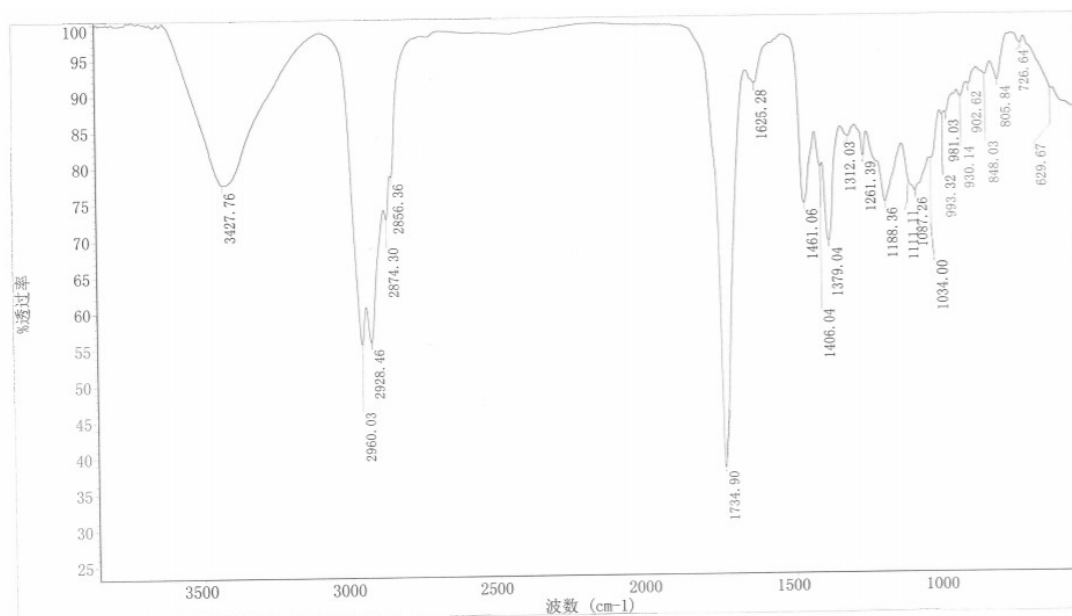

Figure S54. IR spectrum of hypoestin D (4).

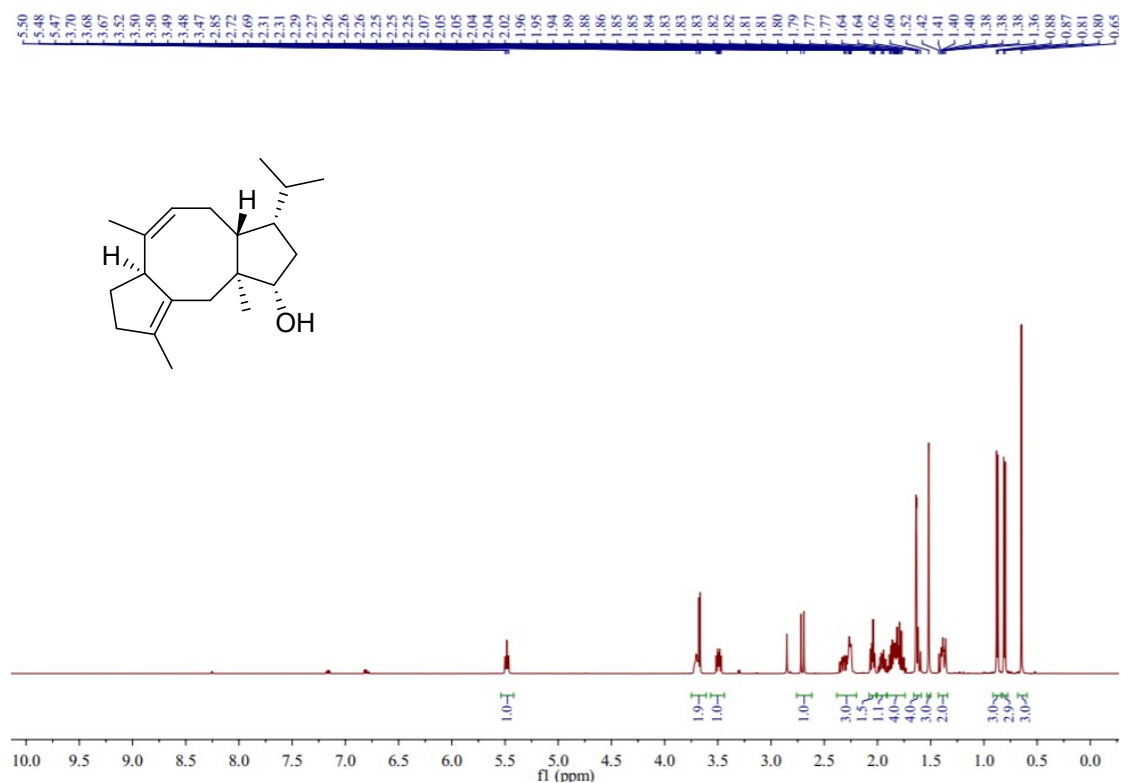

**Figure S55.**  $^1\text{H}$  NMR (500 MHz) spectrum of hypoestin E (**5**) in acetone- $d_6$ .

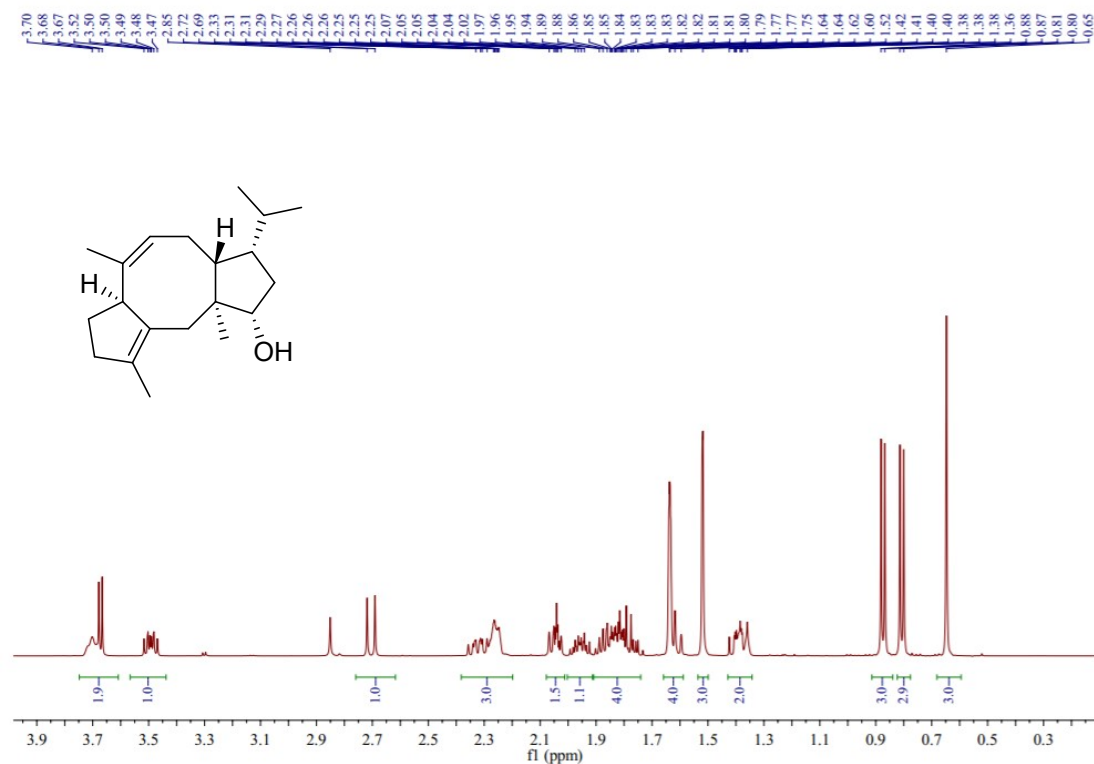

**Figure S56.** Expanded  $^1\text{H}$  NMR spectrum of hypoestin E (**5**).

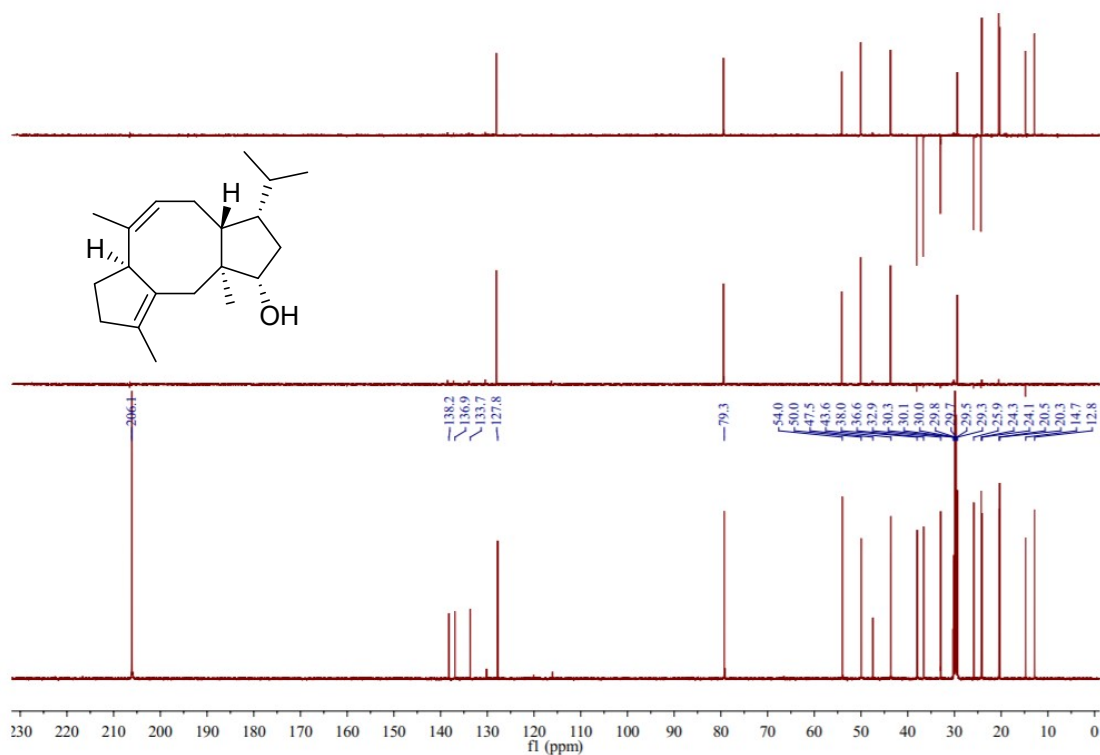

**Figure S57.**  $^{13}\text{C}$  NMR and DEPT (125 MHz) spectra of hypoestin E (**5**) in acetone- $d_6$ .

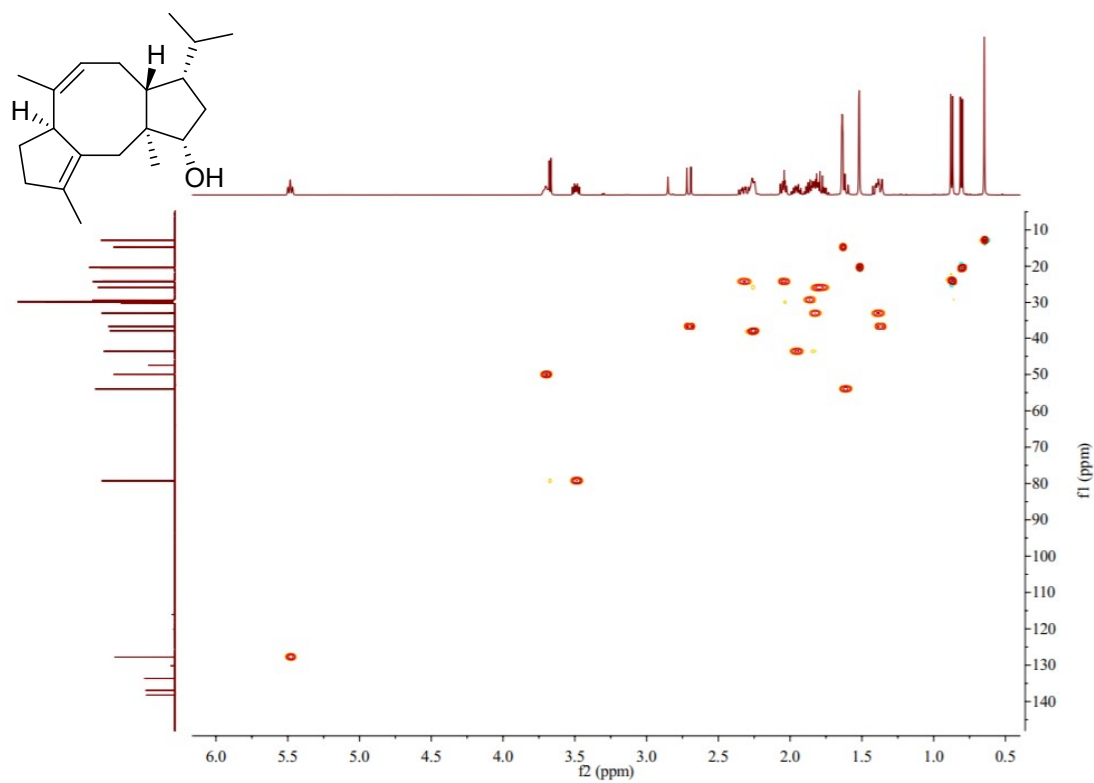

**Figure S58.** HSQC spectrum of hypoestin E (**5**).

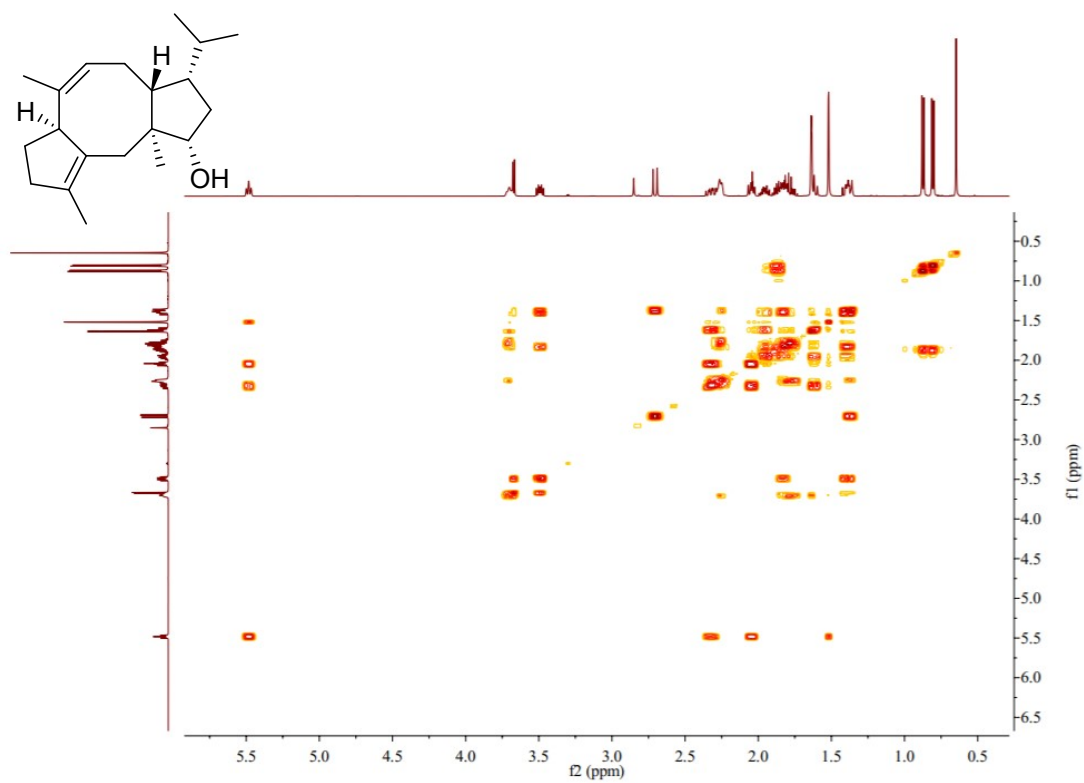

**Figure S59.**  $^1\text{H}$ - $^1\text{H}$  COSY spectrum of hypoestin E (**5**).

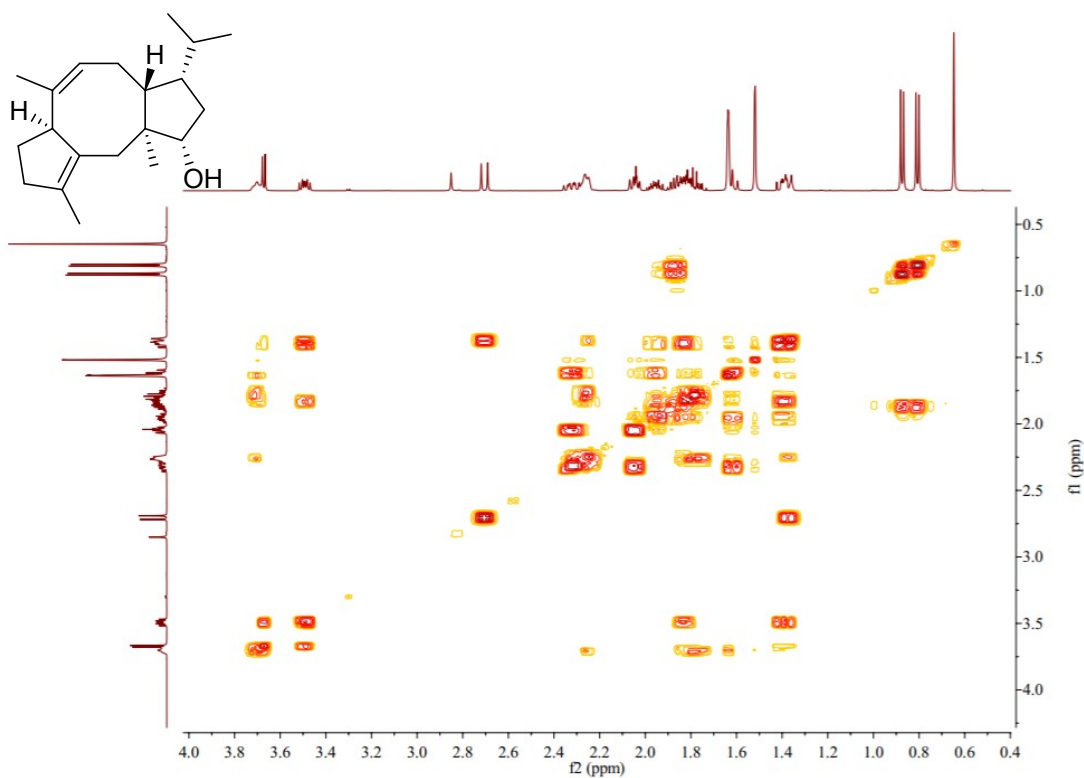

**Figure S60.** Expanded  $^1\text{H}$ - $^1\text{H}$  COSY spectrum of hypoestin E (**5**).

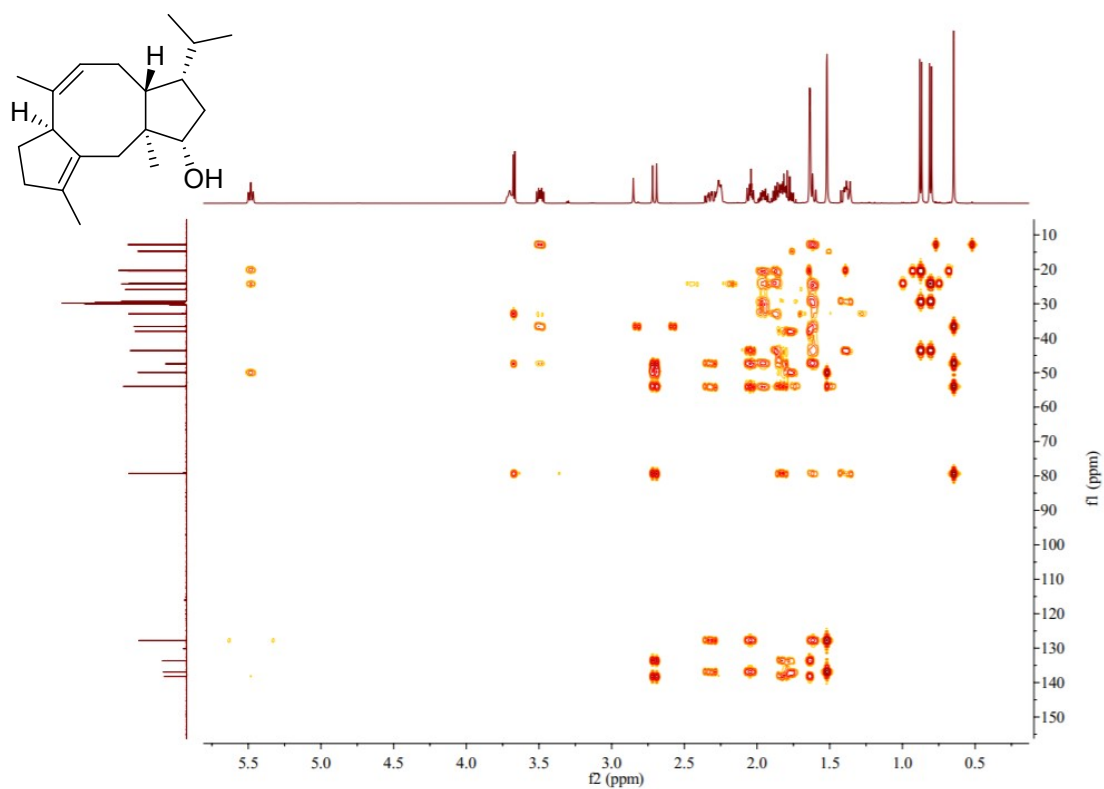

**Figure S61.** HMBC spectrum of hypoestin E (**5**).

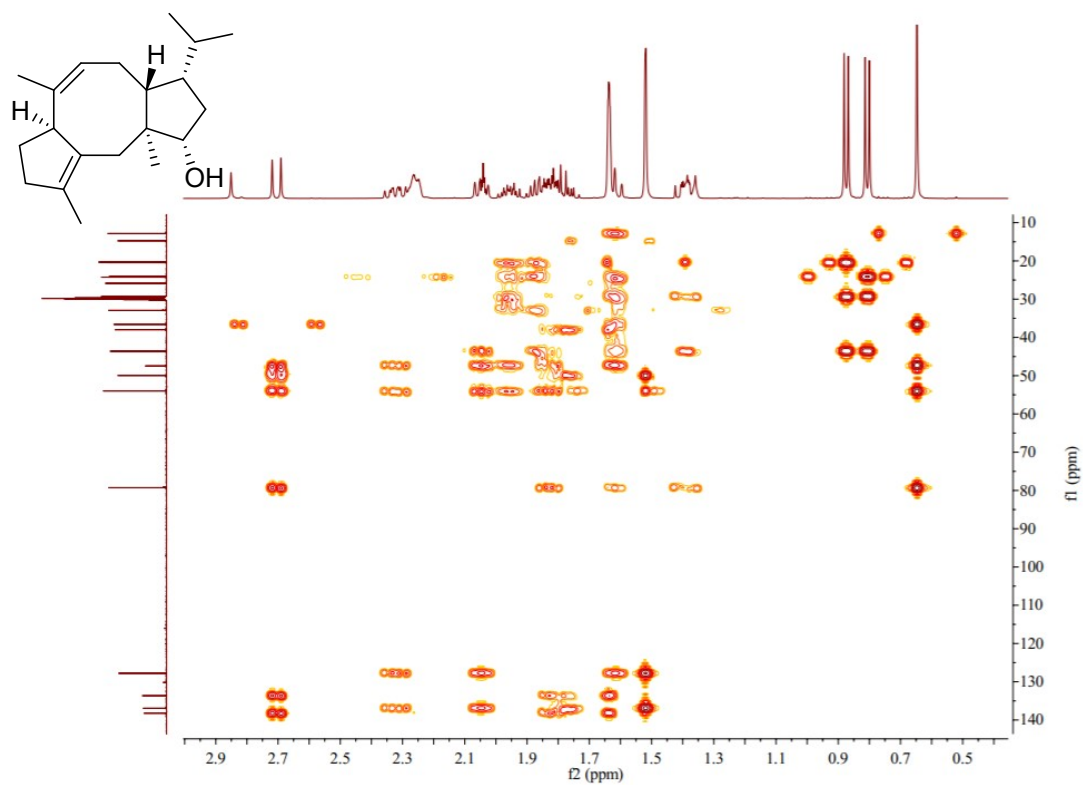

**Figure S62.** Expanded HMBC spectrum of hypoestin E (**5**).

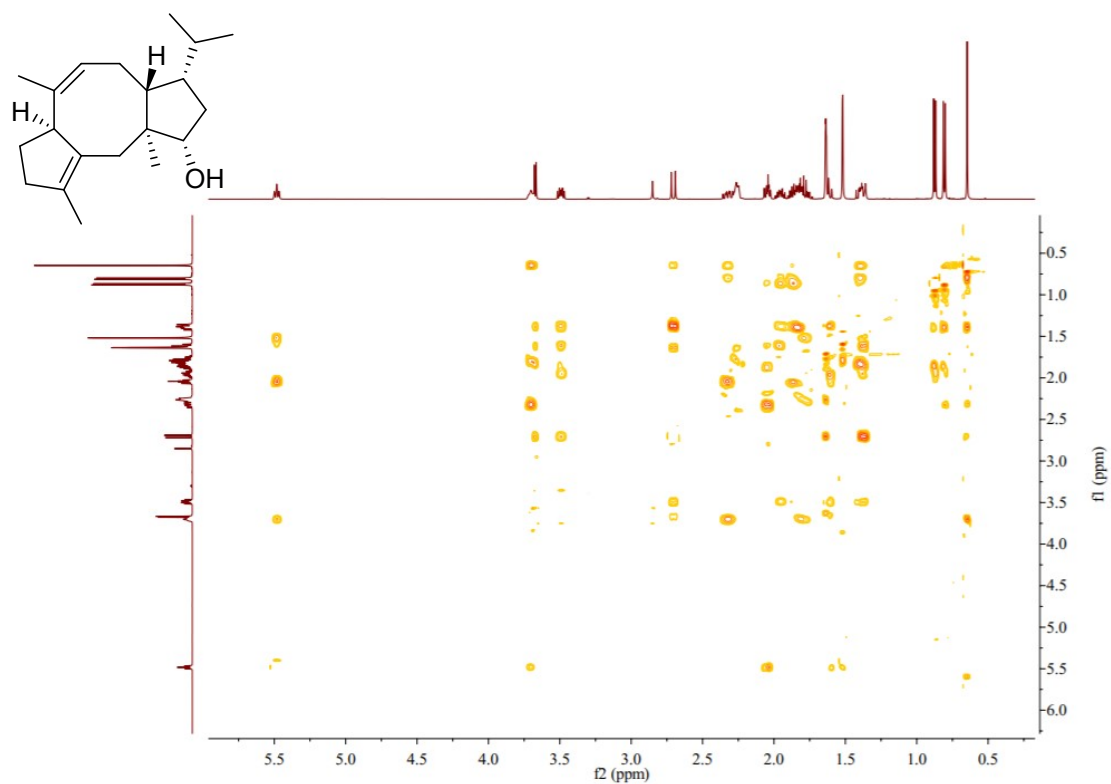

**Figure S63.** ROESY spectrum of hypoestin E (5).

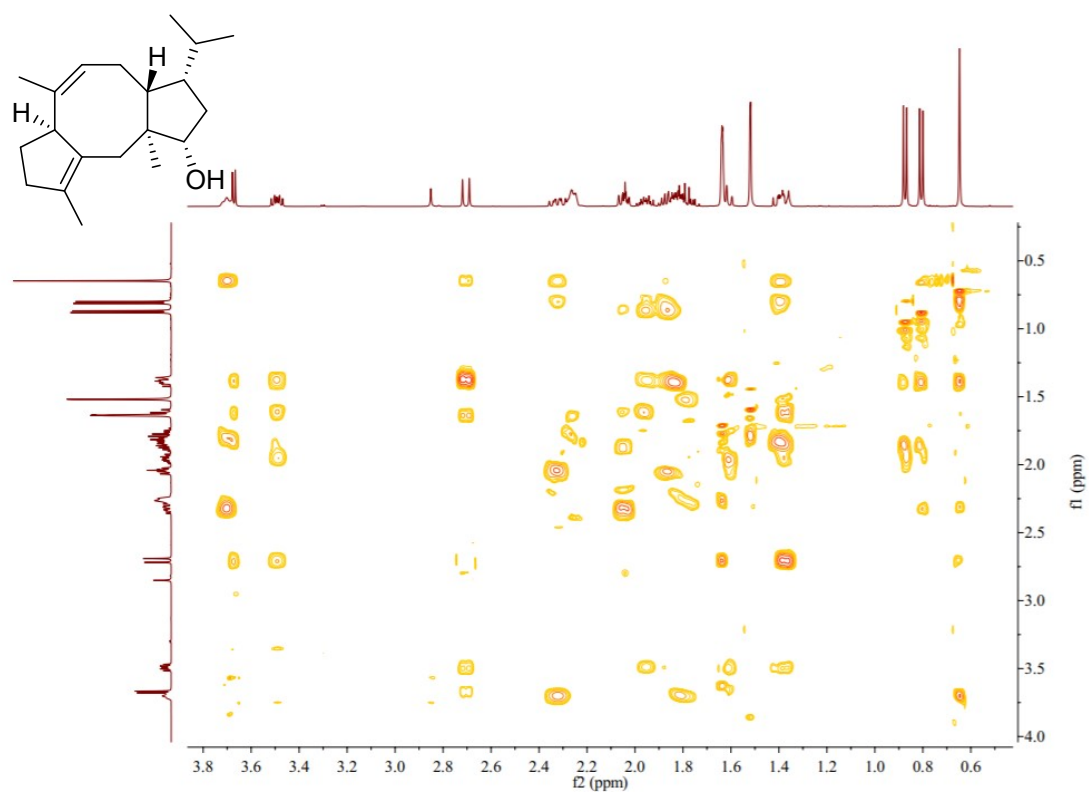

**Figure S64.** Expanded ROESY spectrum of hypoestin E (5).



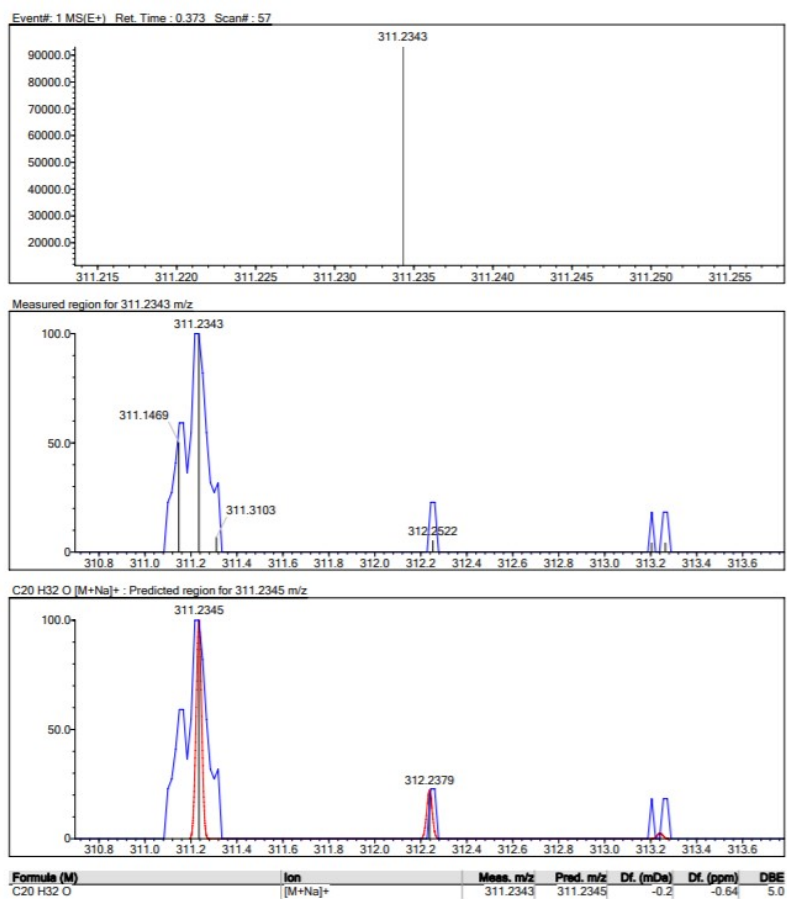

Figure S65. HRESIMS spectrum of hypoestin E (5).

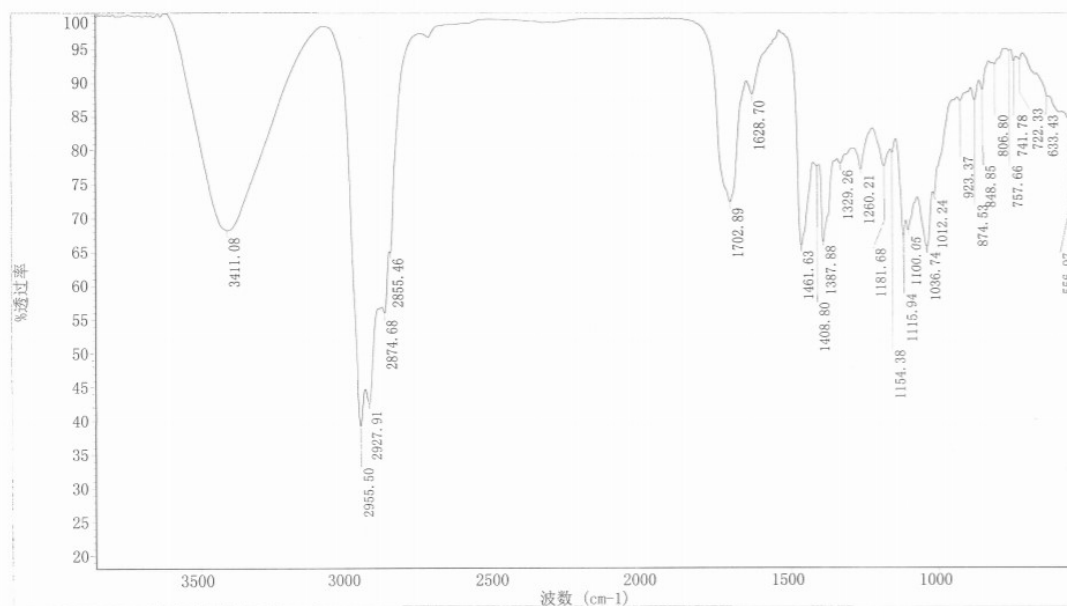

Figure S66. IR spectrum of hypoestin E (5).

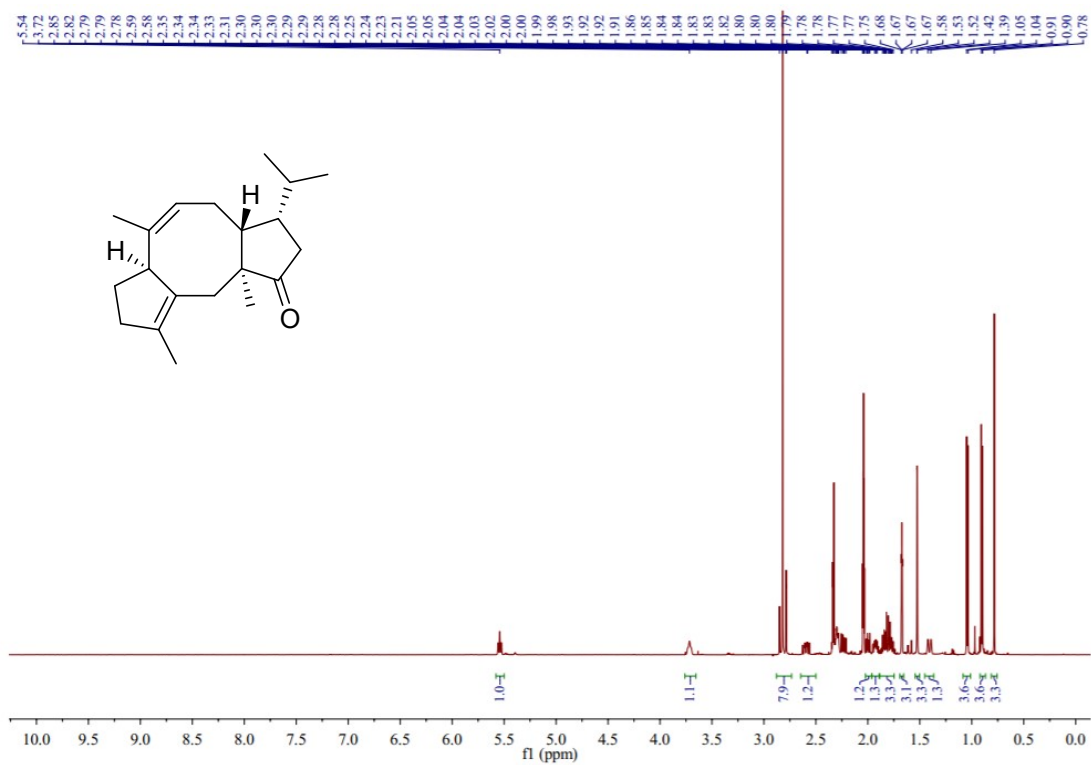

**Figure S67.**  $^1\text{H}$  NMR (500 MHz) spectrum of hypoestin F (**6**) in acetone- $d_6$ .

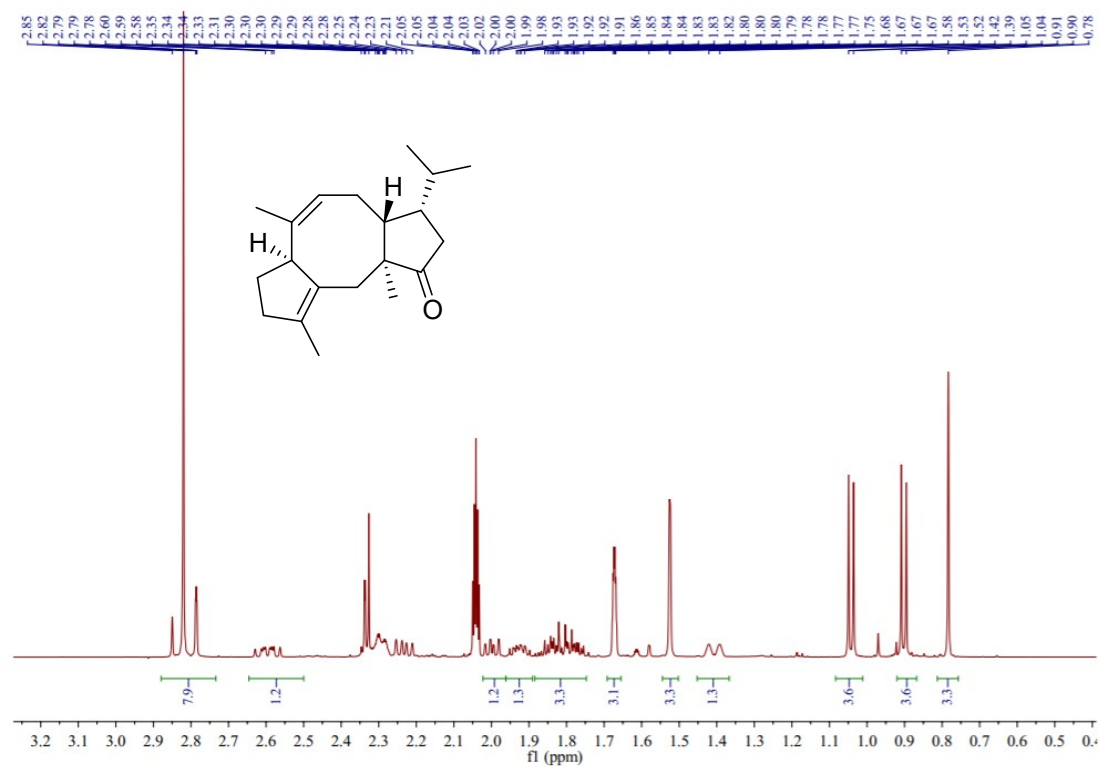

**Figure S68.** Expanded  $^1\text{H}$  NMR spectrum of hypoestin F (**6**).

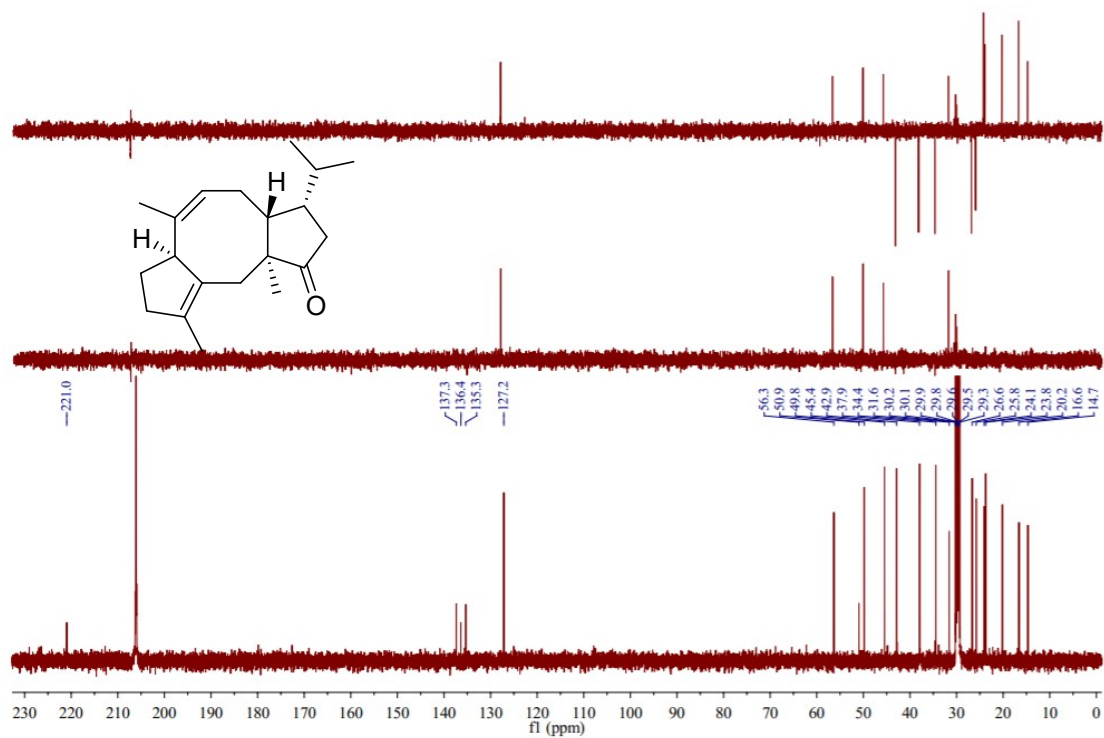

**Figure S69.**  $^{13}\text{C}$  NMR and DEPT (125 MHz) spectra of hypoestin F (6) in acetone- $d_6$ .

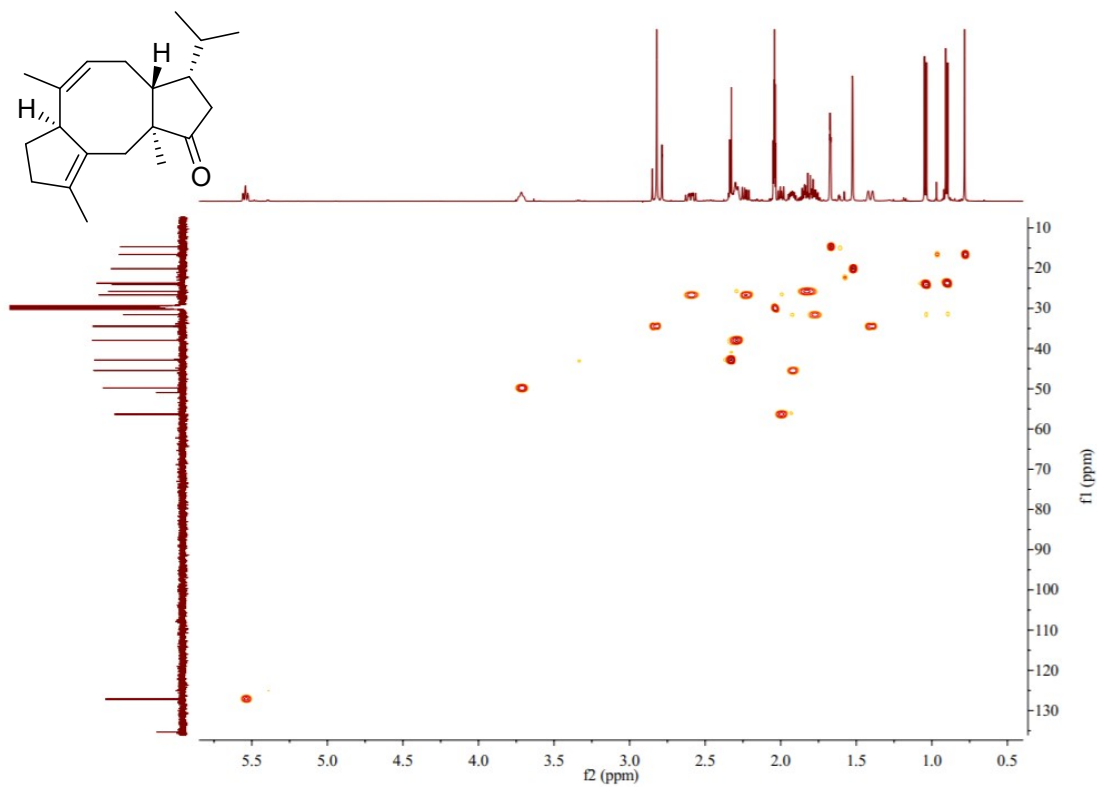

**Figure S70.** HSQC spectrum of hypoestin F (6).

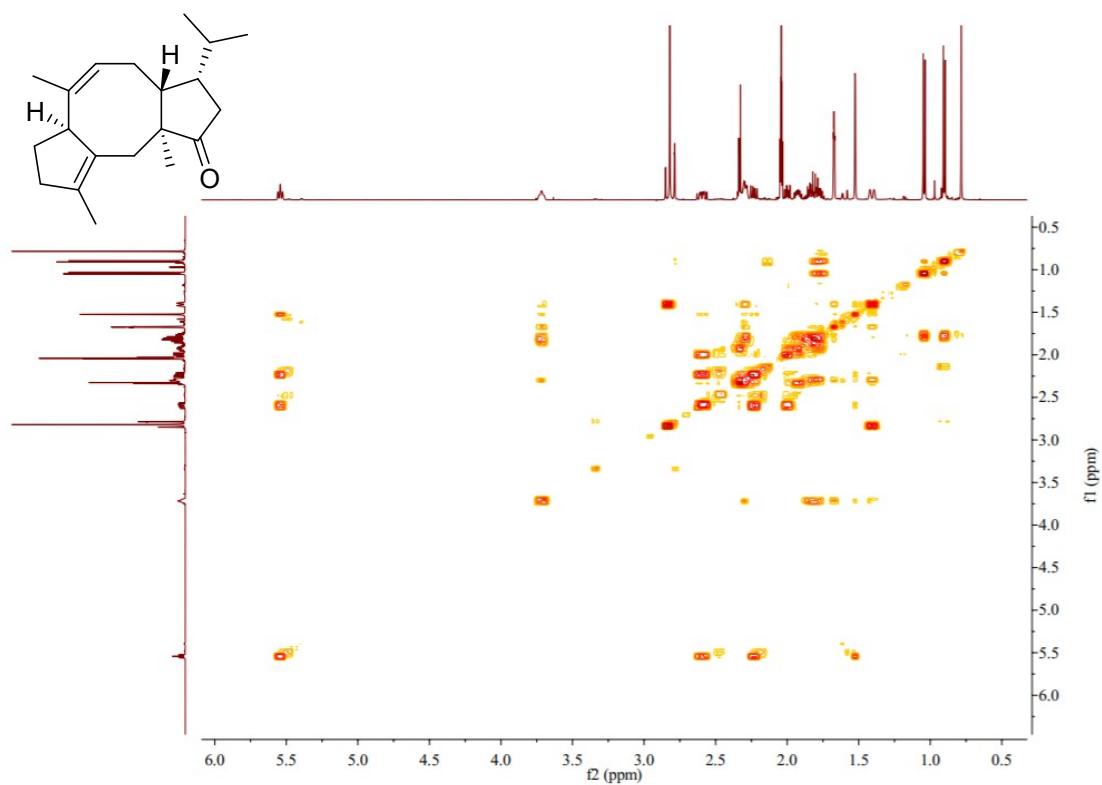

**Figure S71.**  $^1\text{H}$ - $^1\text{H}$  COSY spectrum of hypoestin F (**6**).

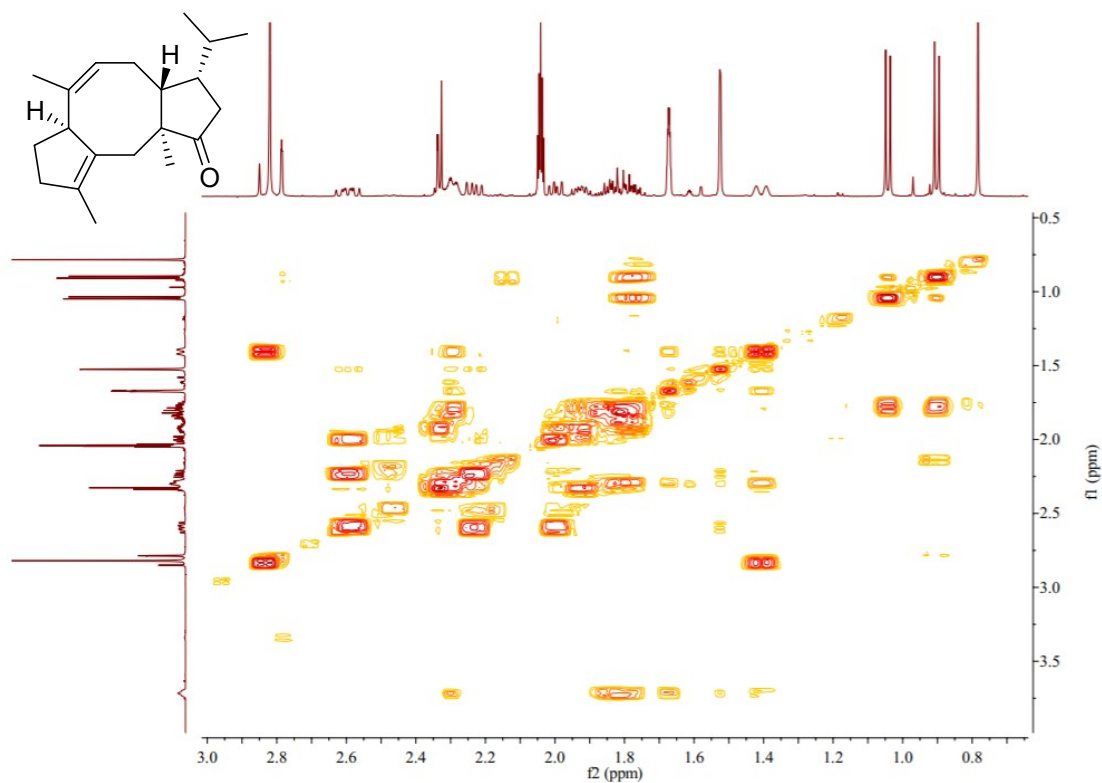

**Figure S72.** Expanded  $^1\text{H}$ - $^1\text{H}$  COSY spectrum of hypoestin F (**6**).

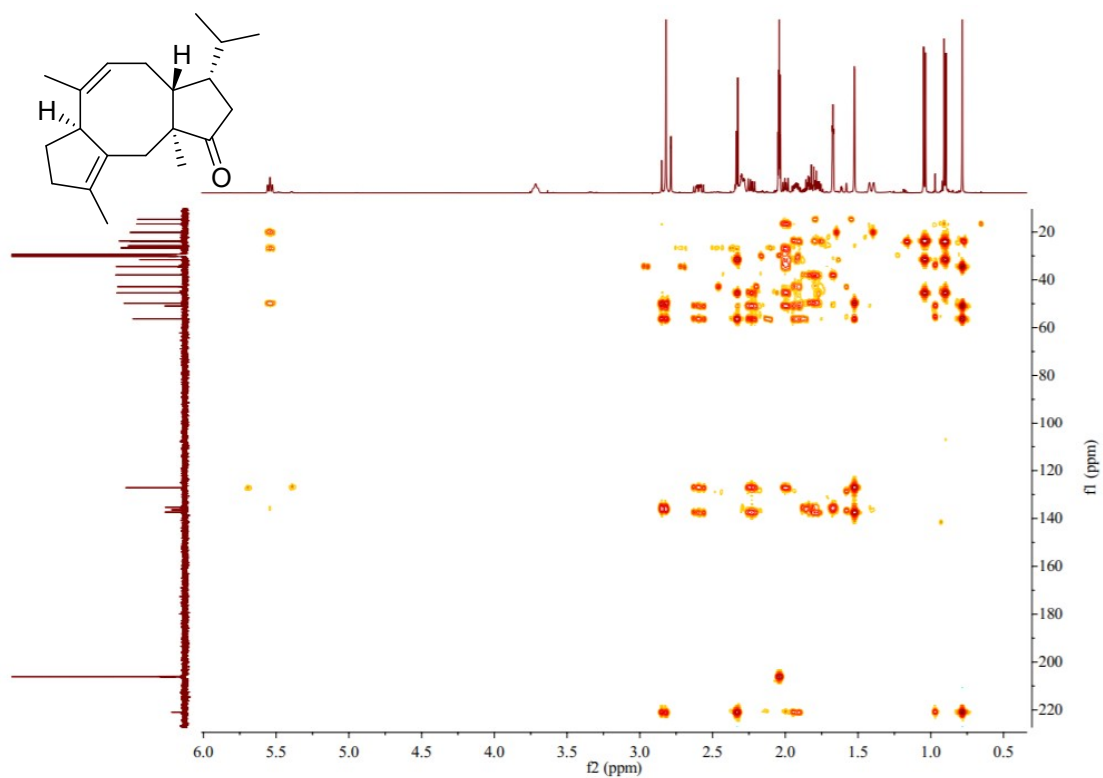

**Figure S73.** HMBC spectrum of hypoestin F (6).

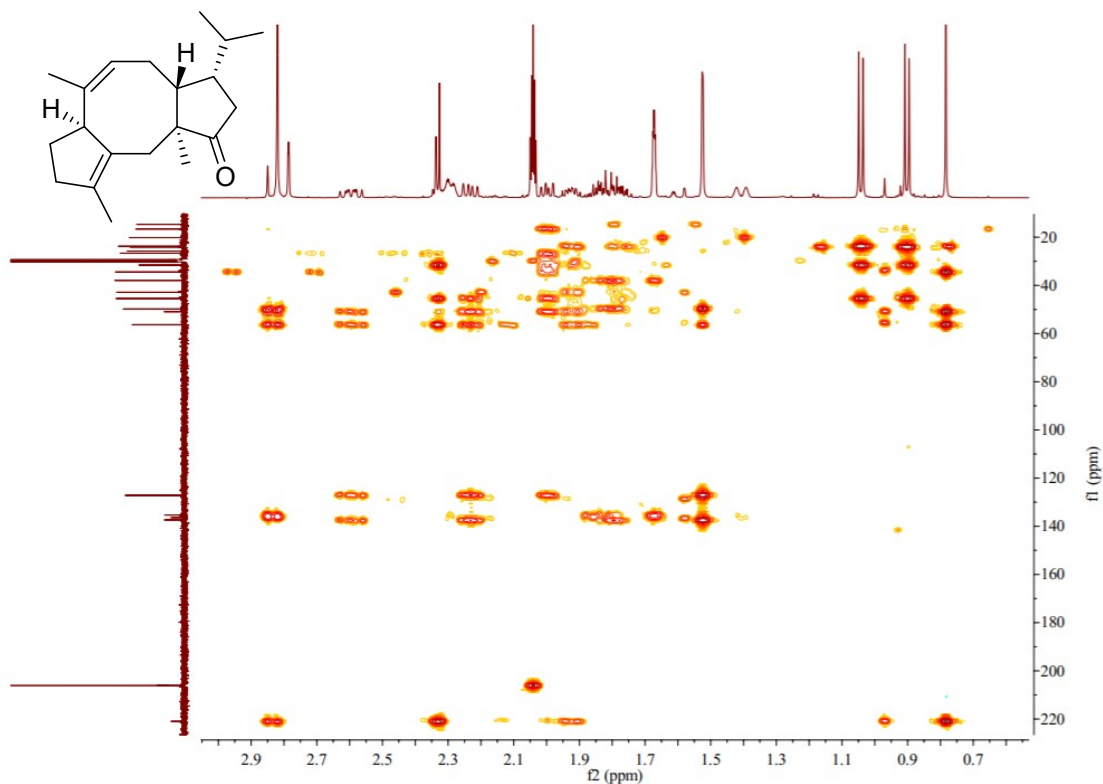

**Figure S74.** Expanded HMBC spectrum of hypoestin F (6).

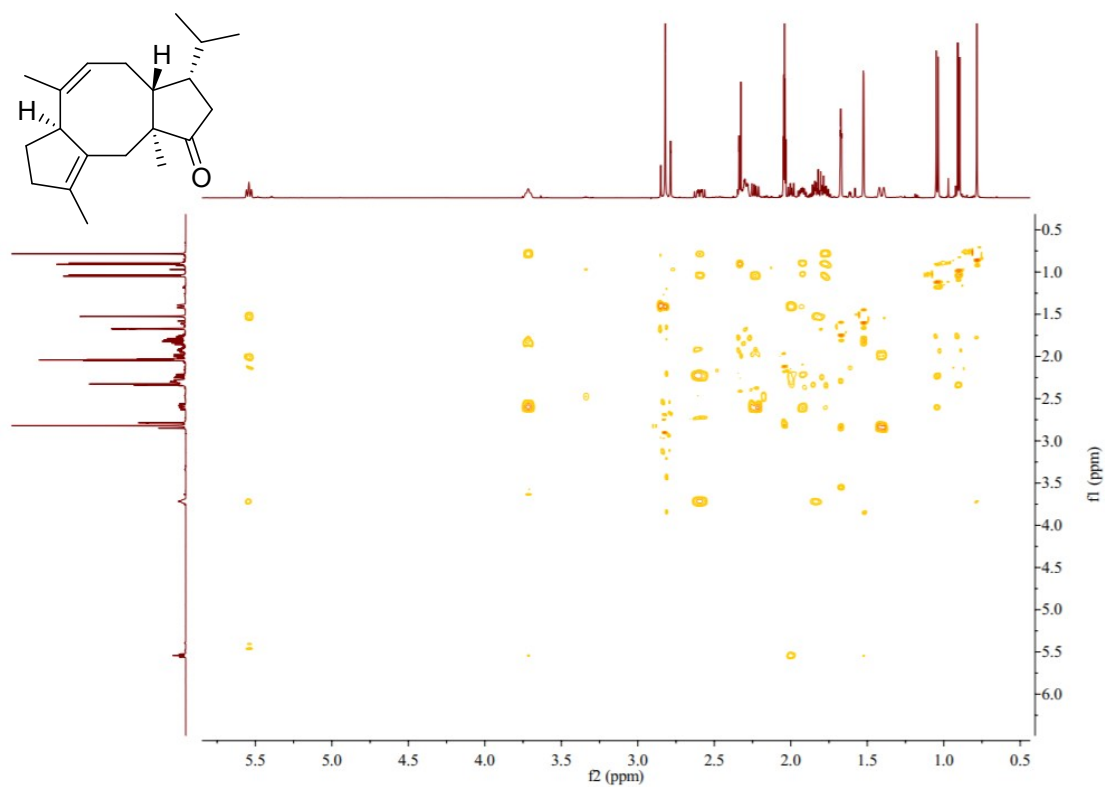

**Figure S75.** ROESY spectrum of hypoestin F (6).

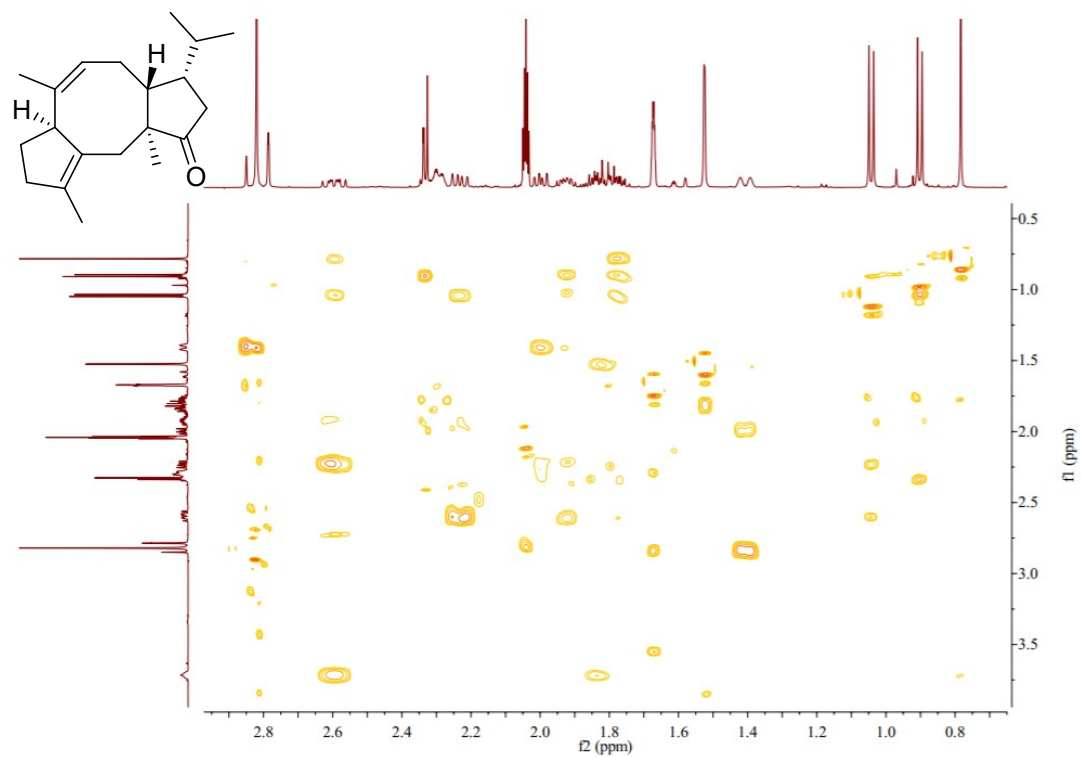

**Figure S76.** Expanded ROESY spectrum of hypoestin F (6).

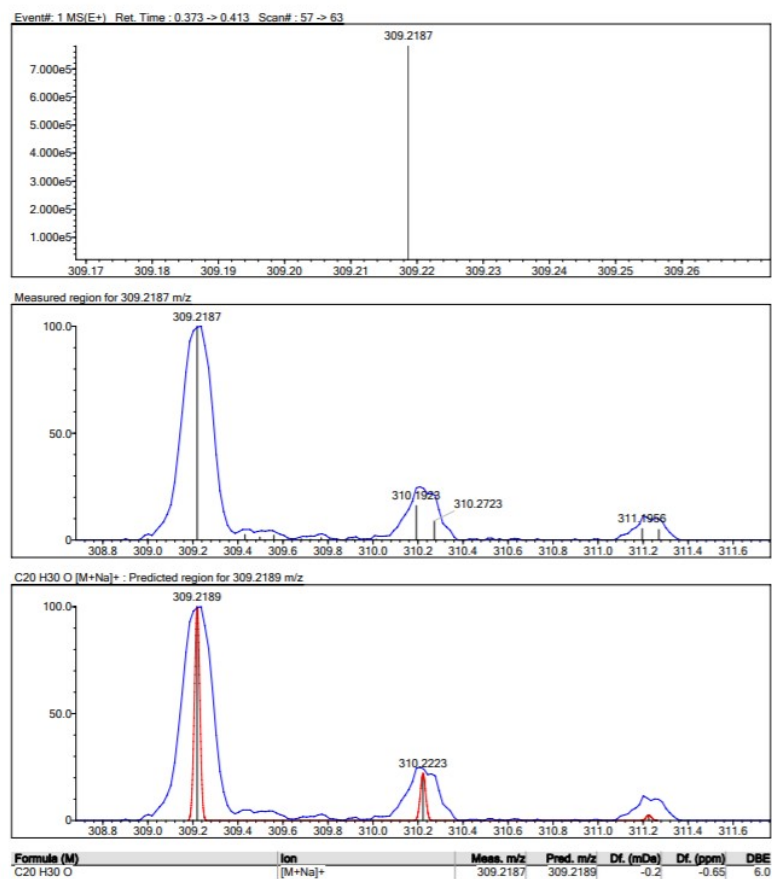

Figure S77. HRESIMS spectrum of hypoestin F (6).

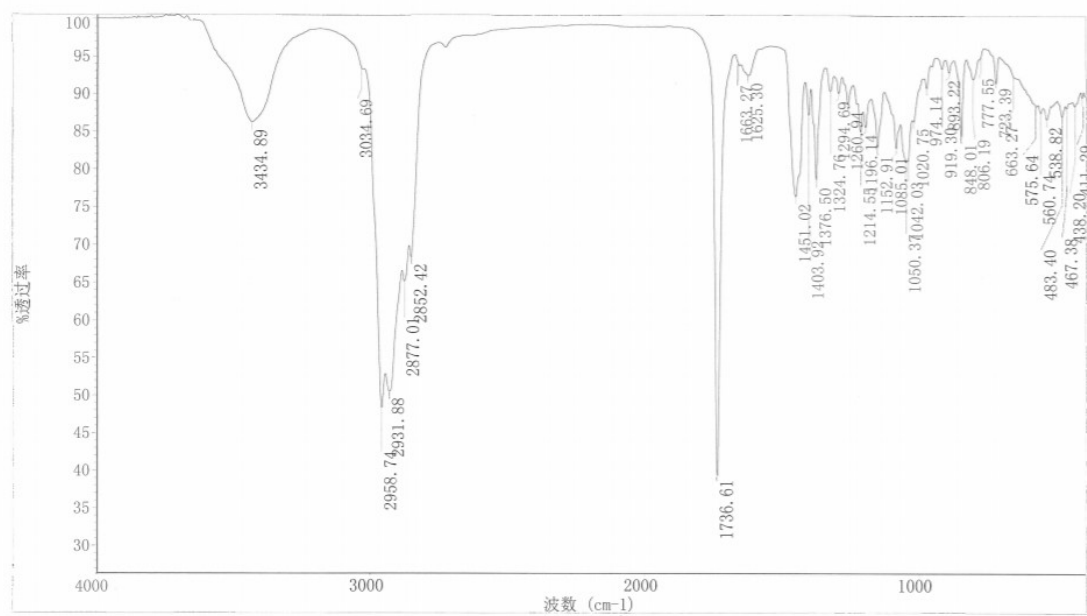

Figure S78. IR spectrum of hypoestin F (6).
